# Supplementary material
Source: PubMed Central journal article supplement (PMC5679103)
Supplement: NIHMS914655-supplement-Supplemental_Information.pdf [file NIHMS914655-supplement-Supplemental_Information.pdf]

## Supporting information for

Antiplasmodial Sesquiterpenoid Lactones from *Trichospira verticillata*: Structure Elucidation by Spectroscopic Methods and Comparison of Experimental and Calculated ECD Data

Yongle Du, Kirk C. Pearce, Yumin Dai, Priscilla Krai, Seema Dalal, Maria B. Cassera, Michael Goetz, Daniel Crawford and David G. I. Kingston

### Contents:

For each of Trichospirolides A-D (compounds **1** – **4**):

$^1\text{H}$ ,  $^{13}\text{C}$ , gHMBC, gHSQC, and NOESY spectra

Relative Free Energies and Room Temperature Boltzmann Population for Conformers of Enantiomerically Unique Stereoisomers

Comparison of Experimental and calculated ECD Spectra for all Possible Stereoisomers

Comparison of Experimental and calculated UV Spectra for all Possible Stereoisomers

Calculated Weighted Average Internuclear Distances for Enantiomerically Unique Stereoisomers

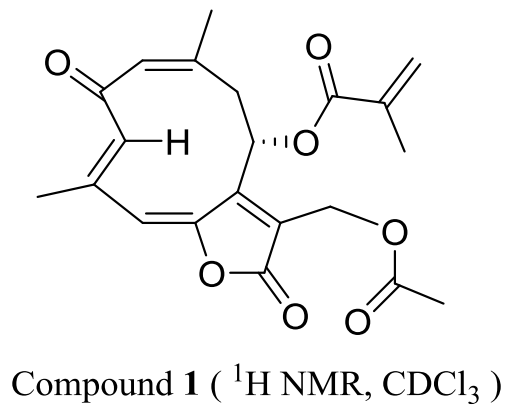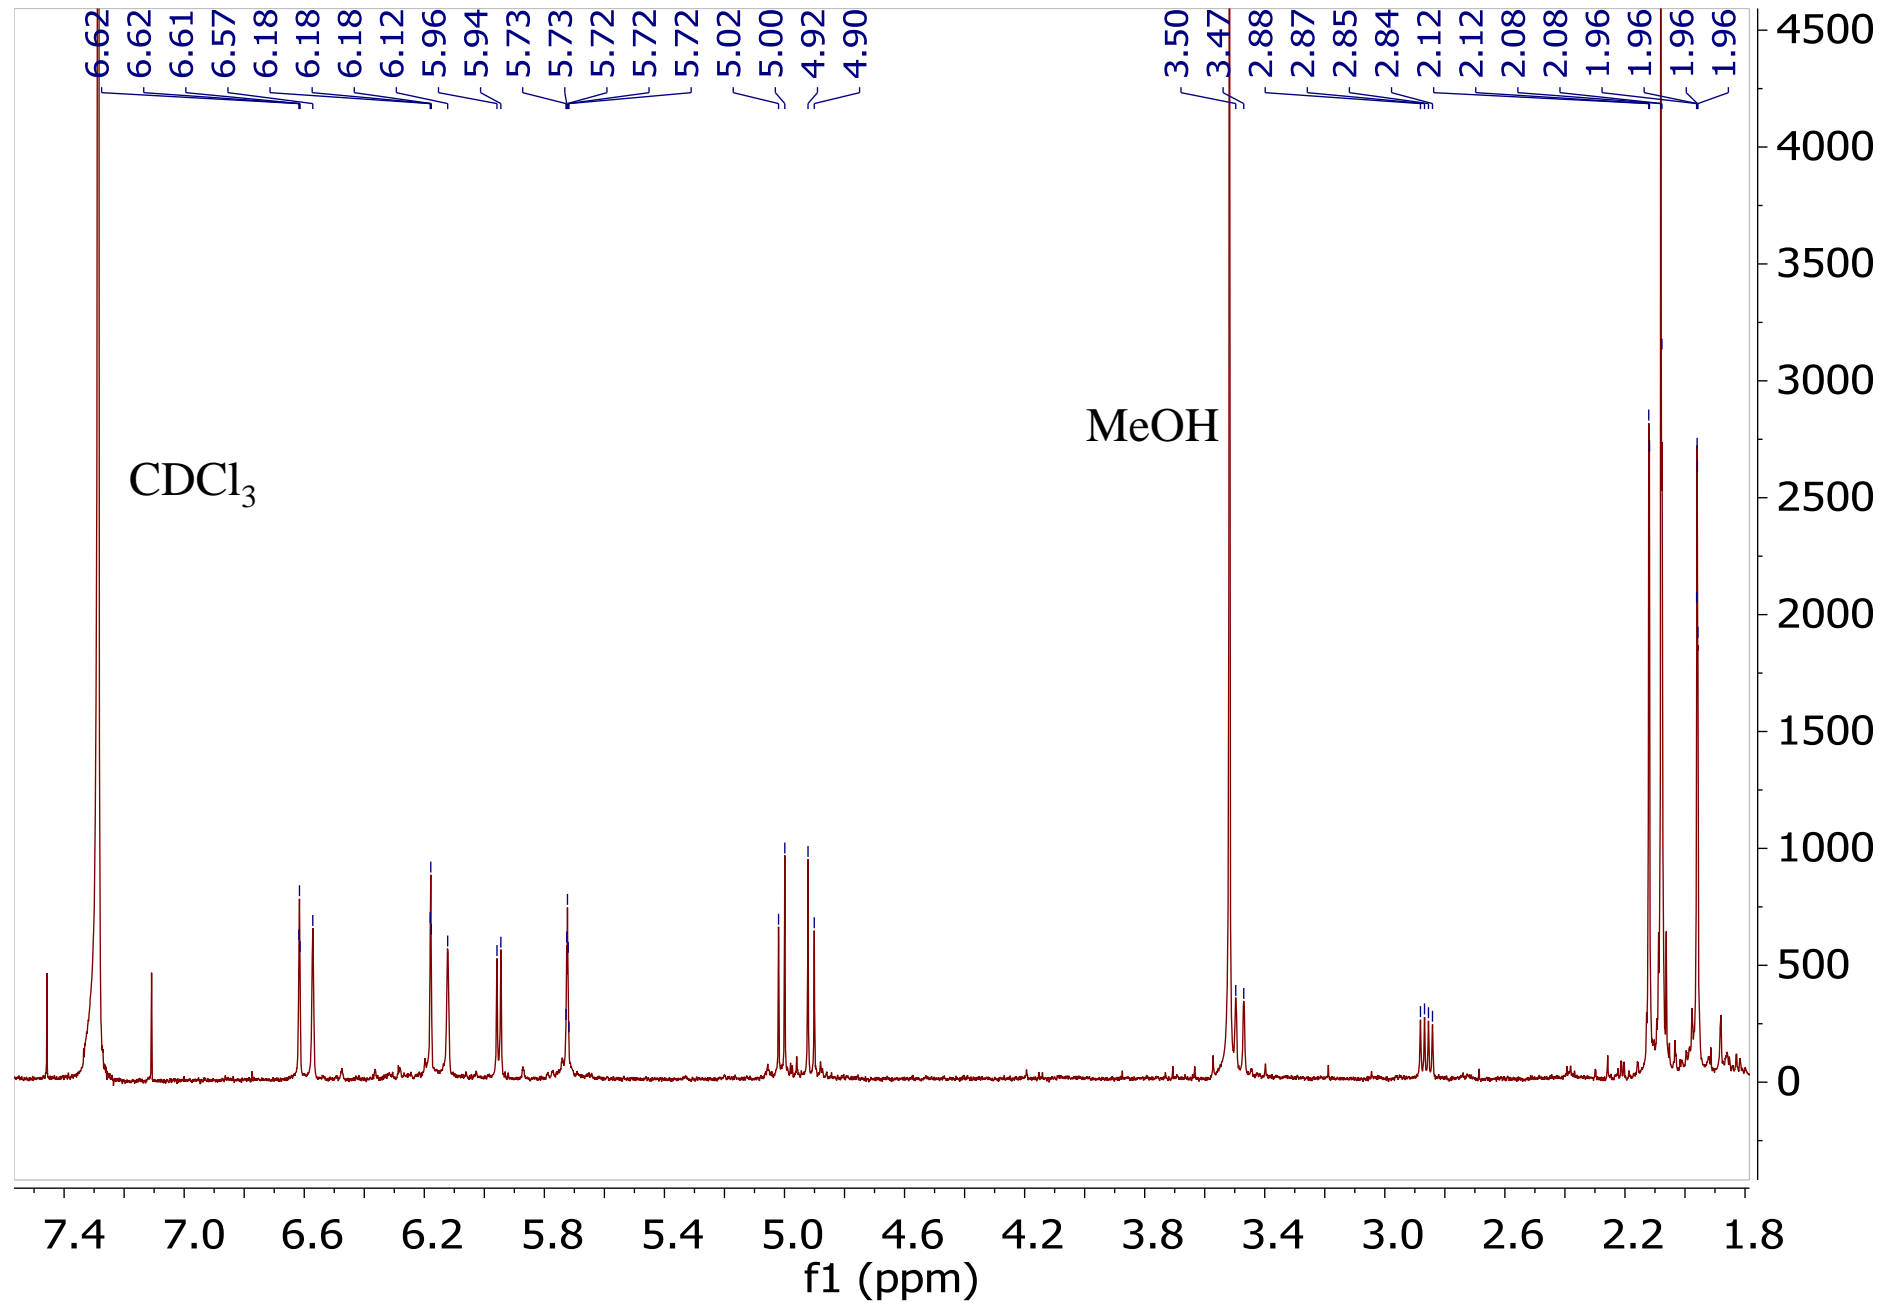

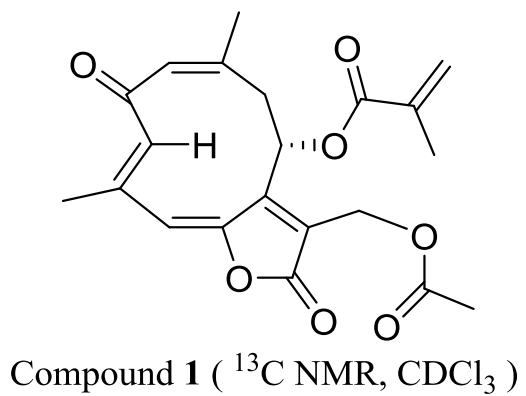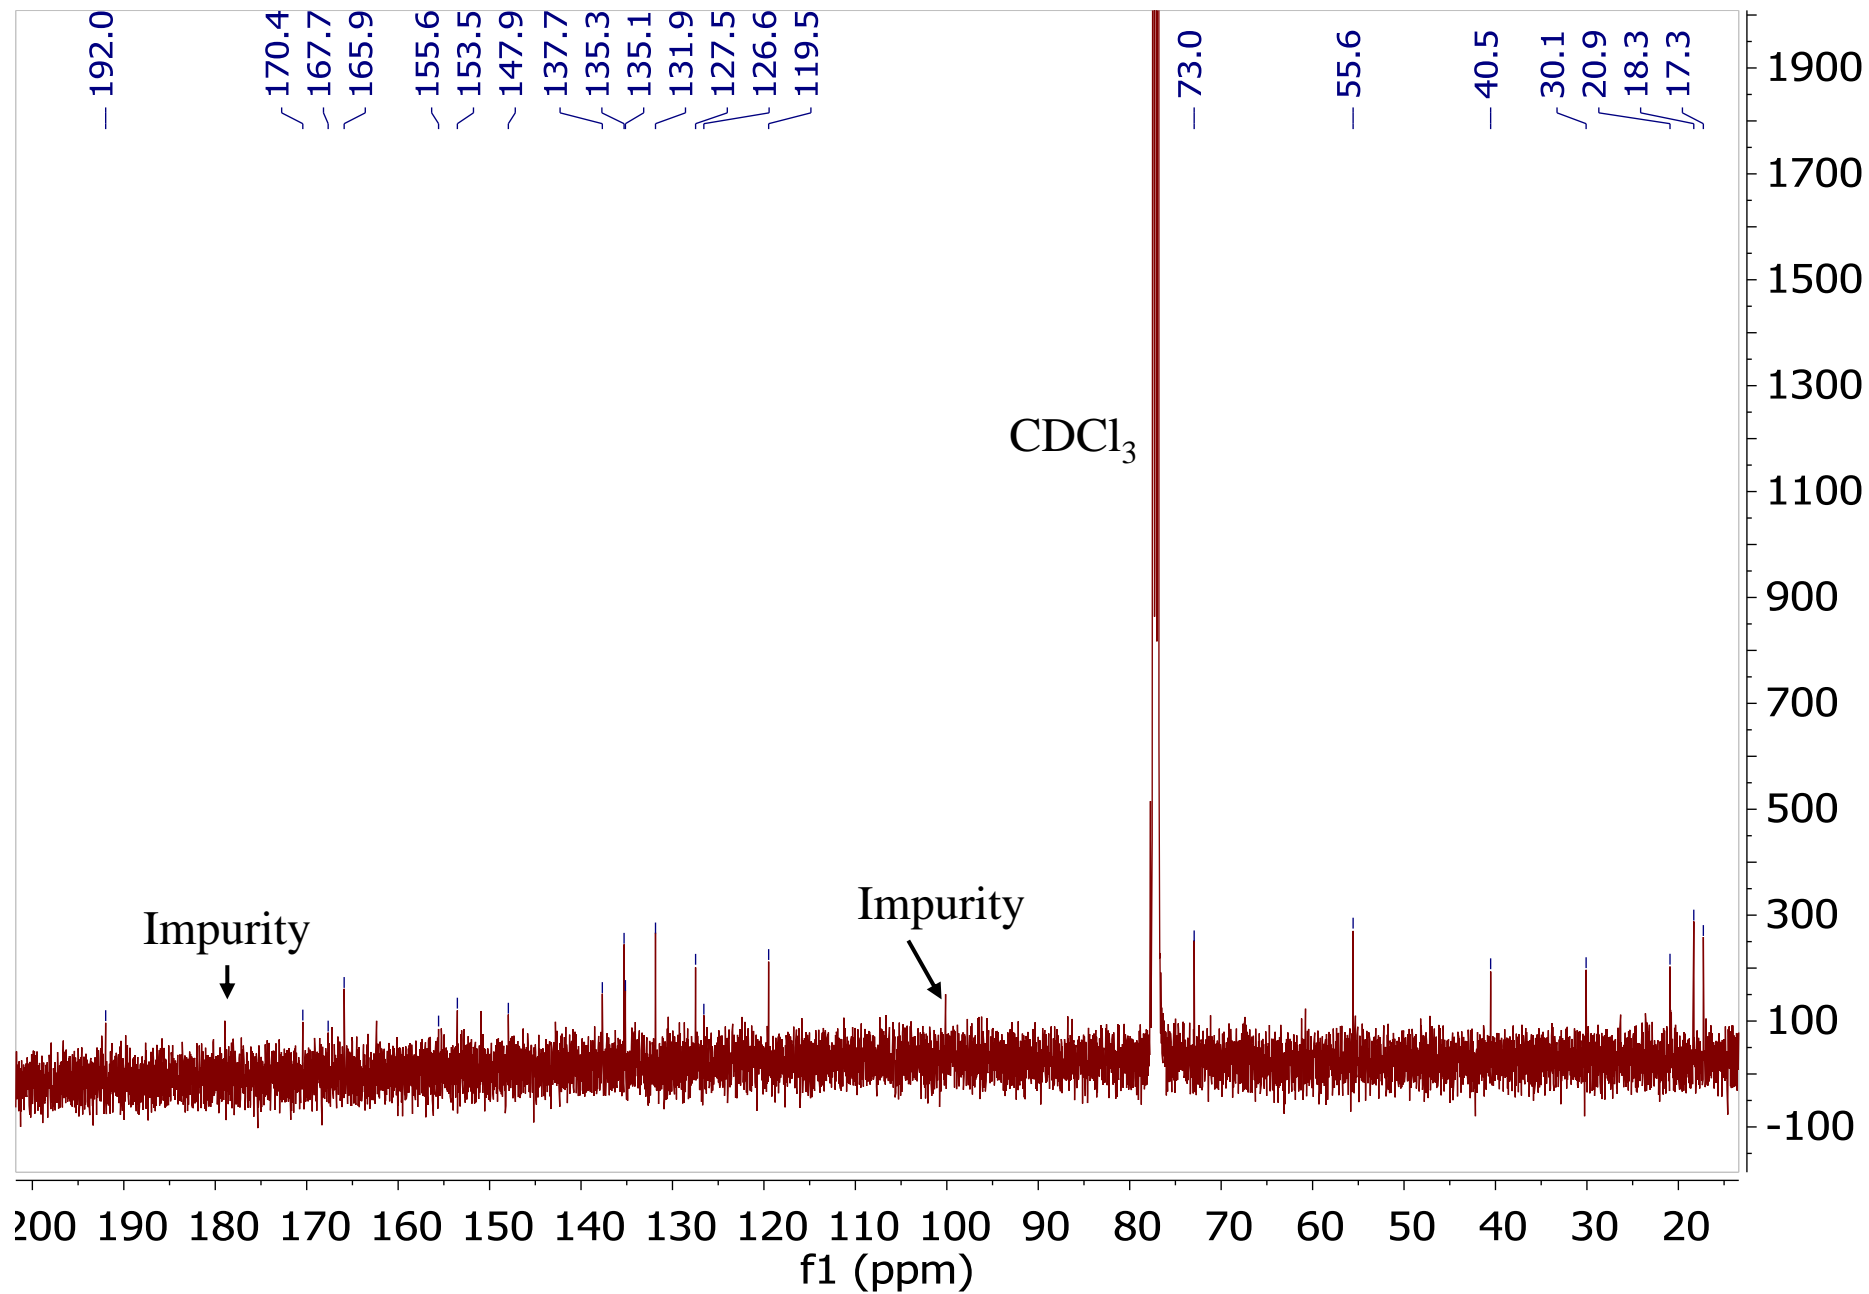

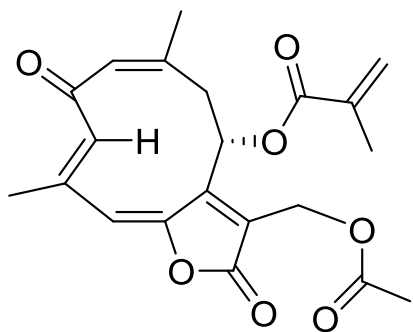

Compound 1 ( gHSQC, CDCl<sub>3</sub> )

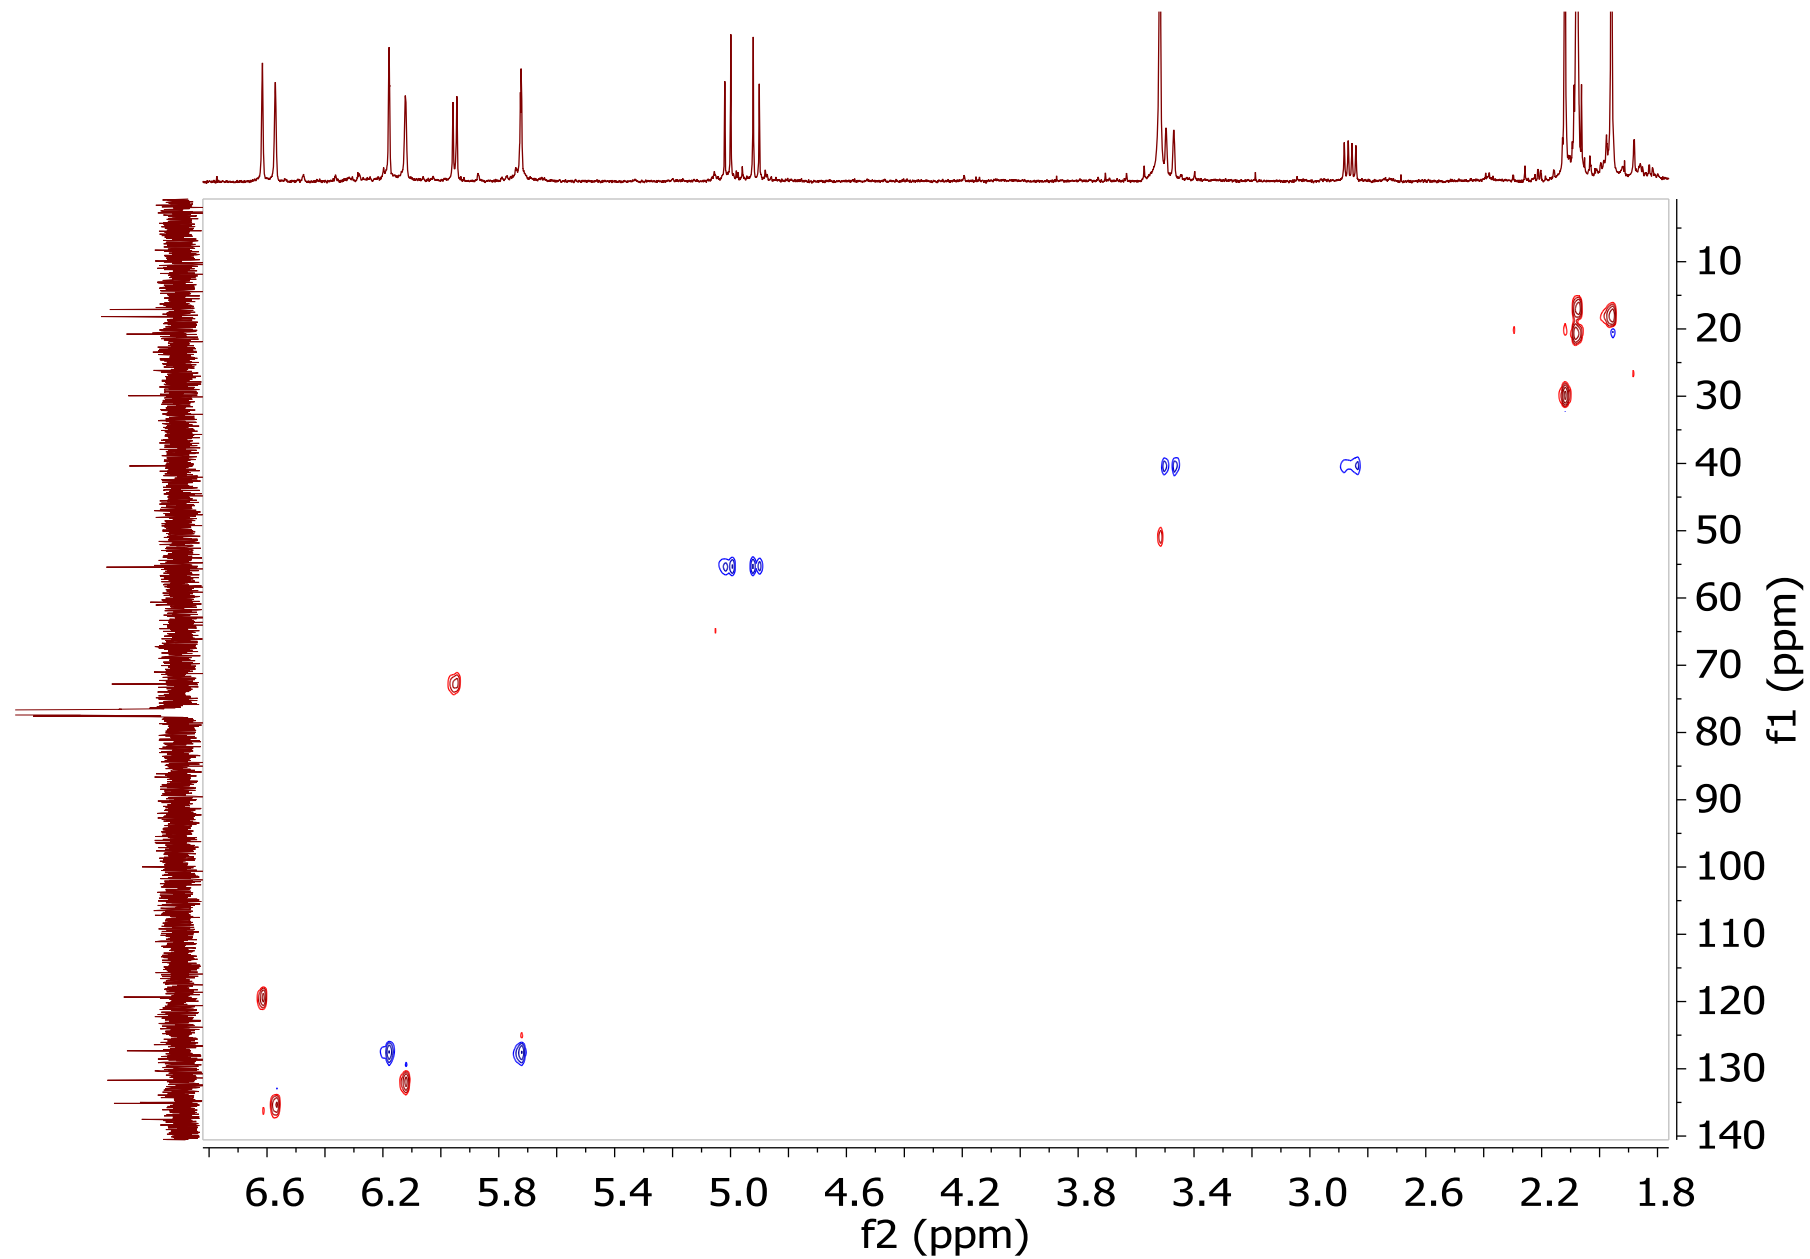

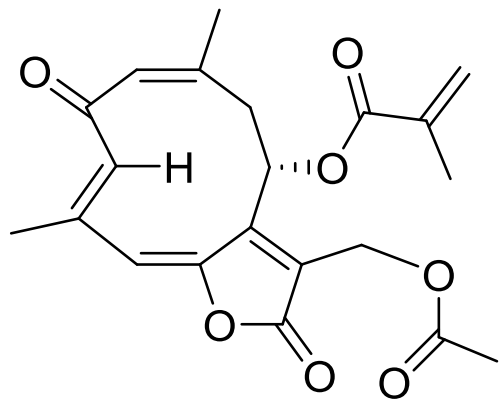

Compound 1 ( gHMBC, CDCl<sub>3</sub> )

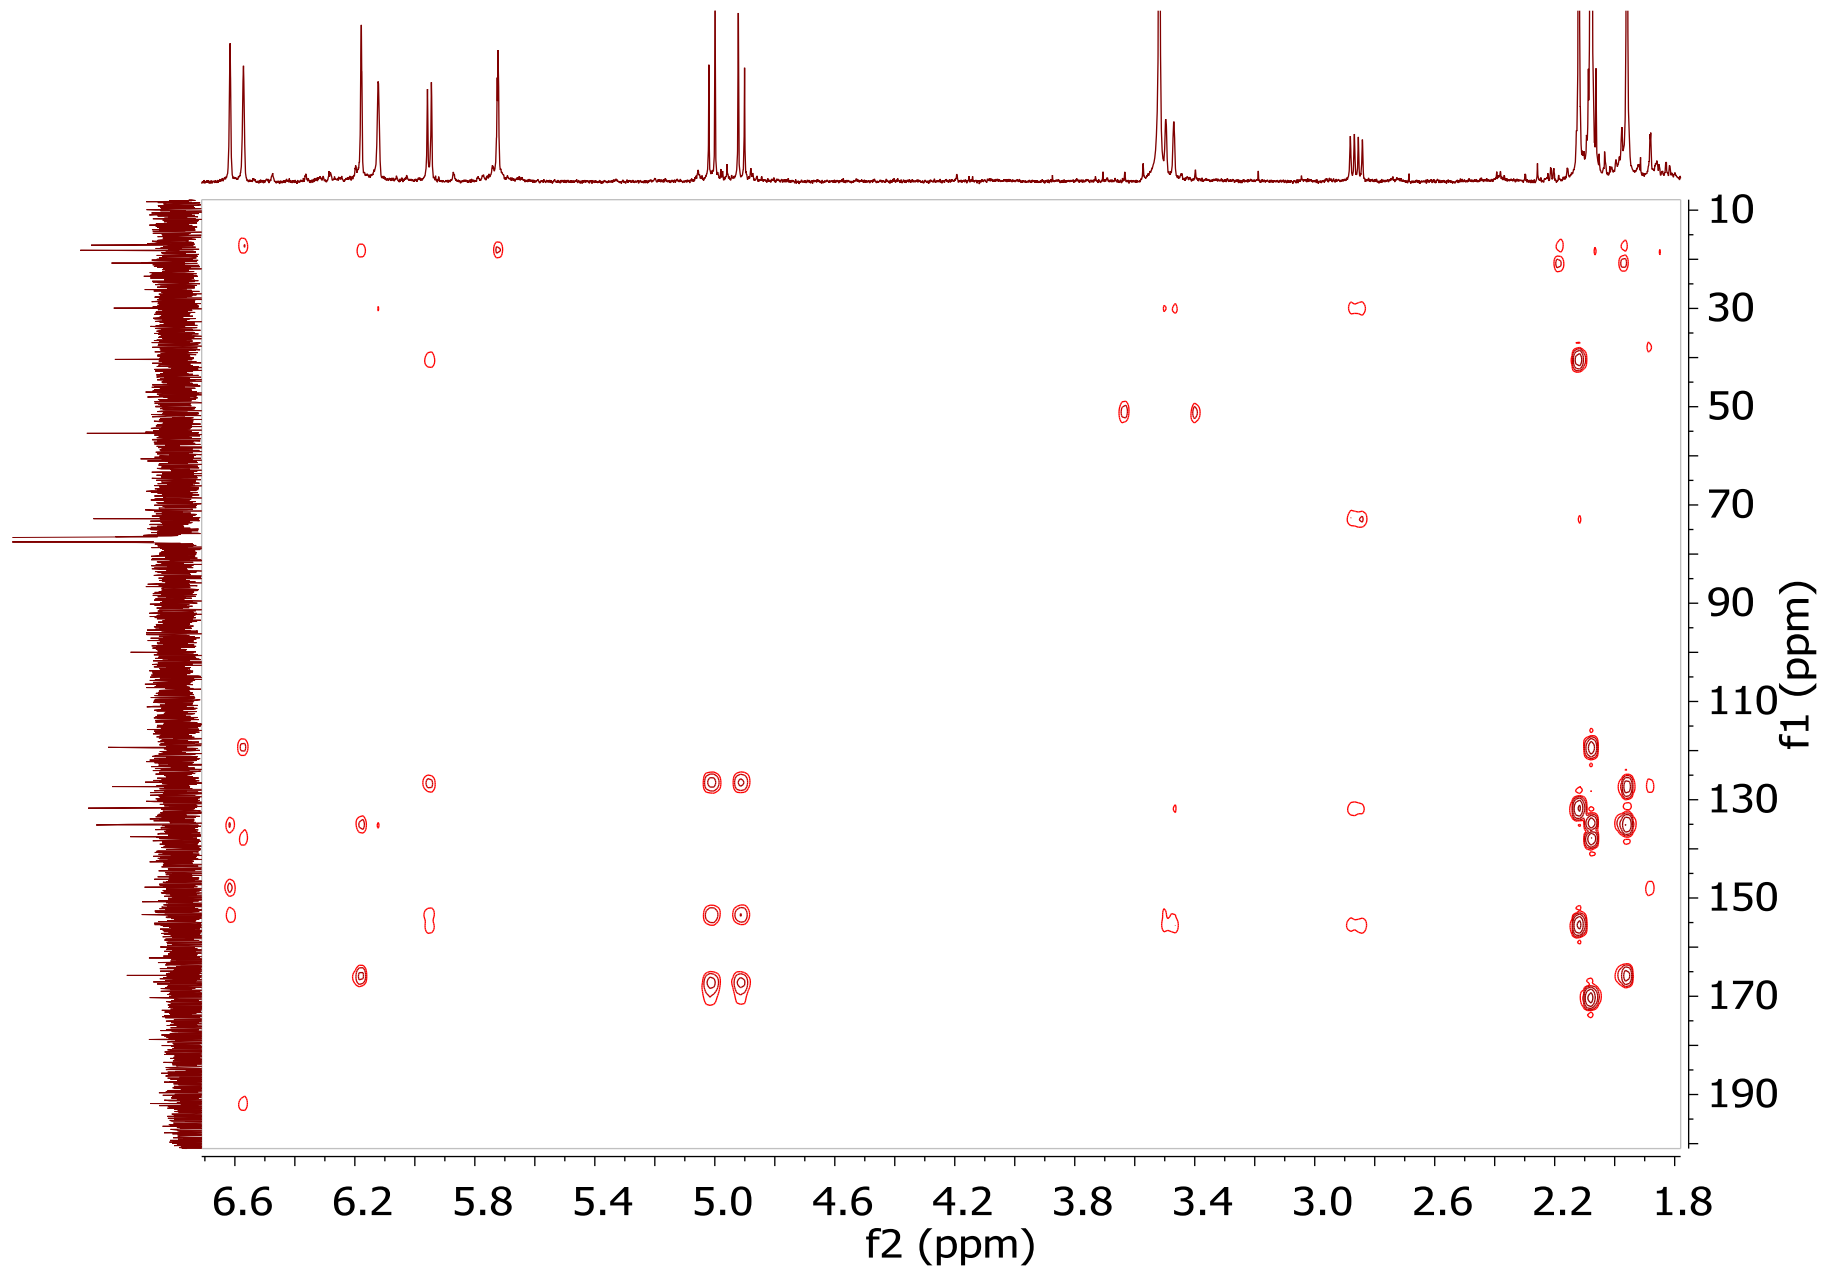

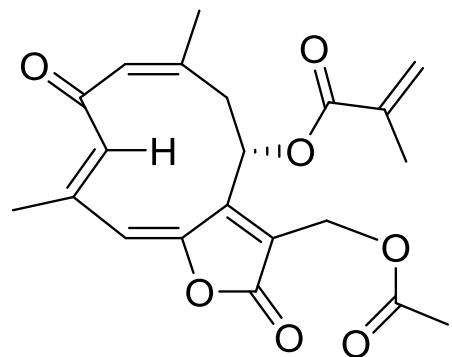

Compound 1 ( NOESY, CDCl<sub>3</sub> )

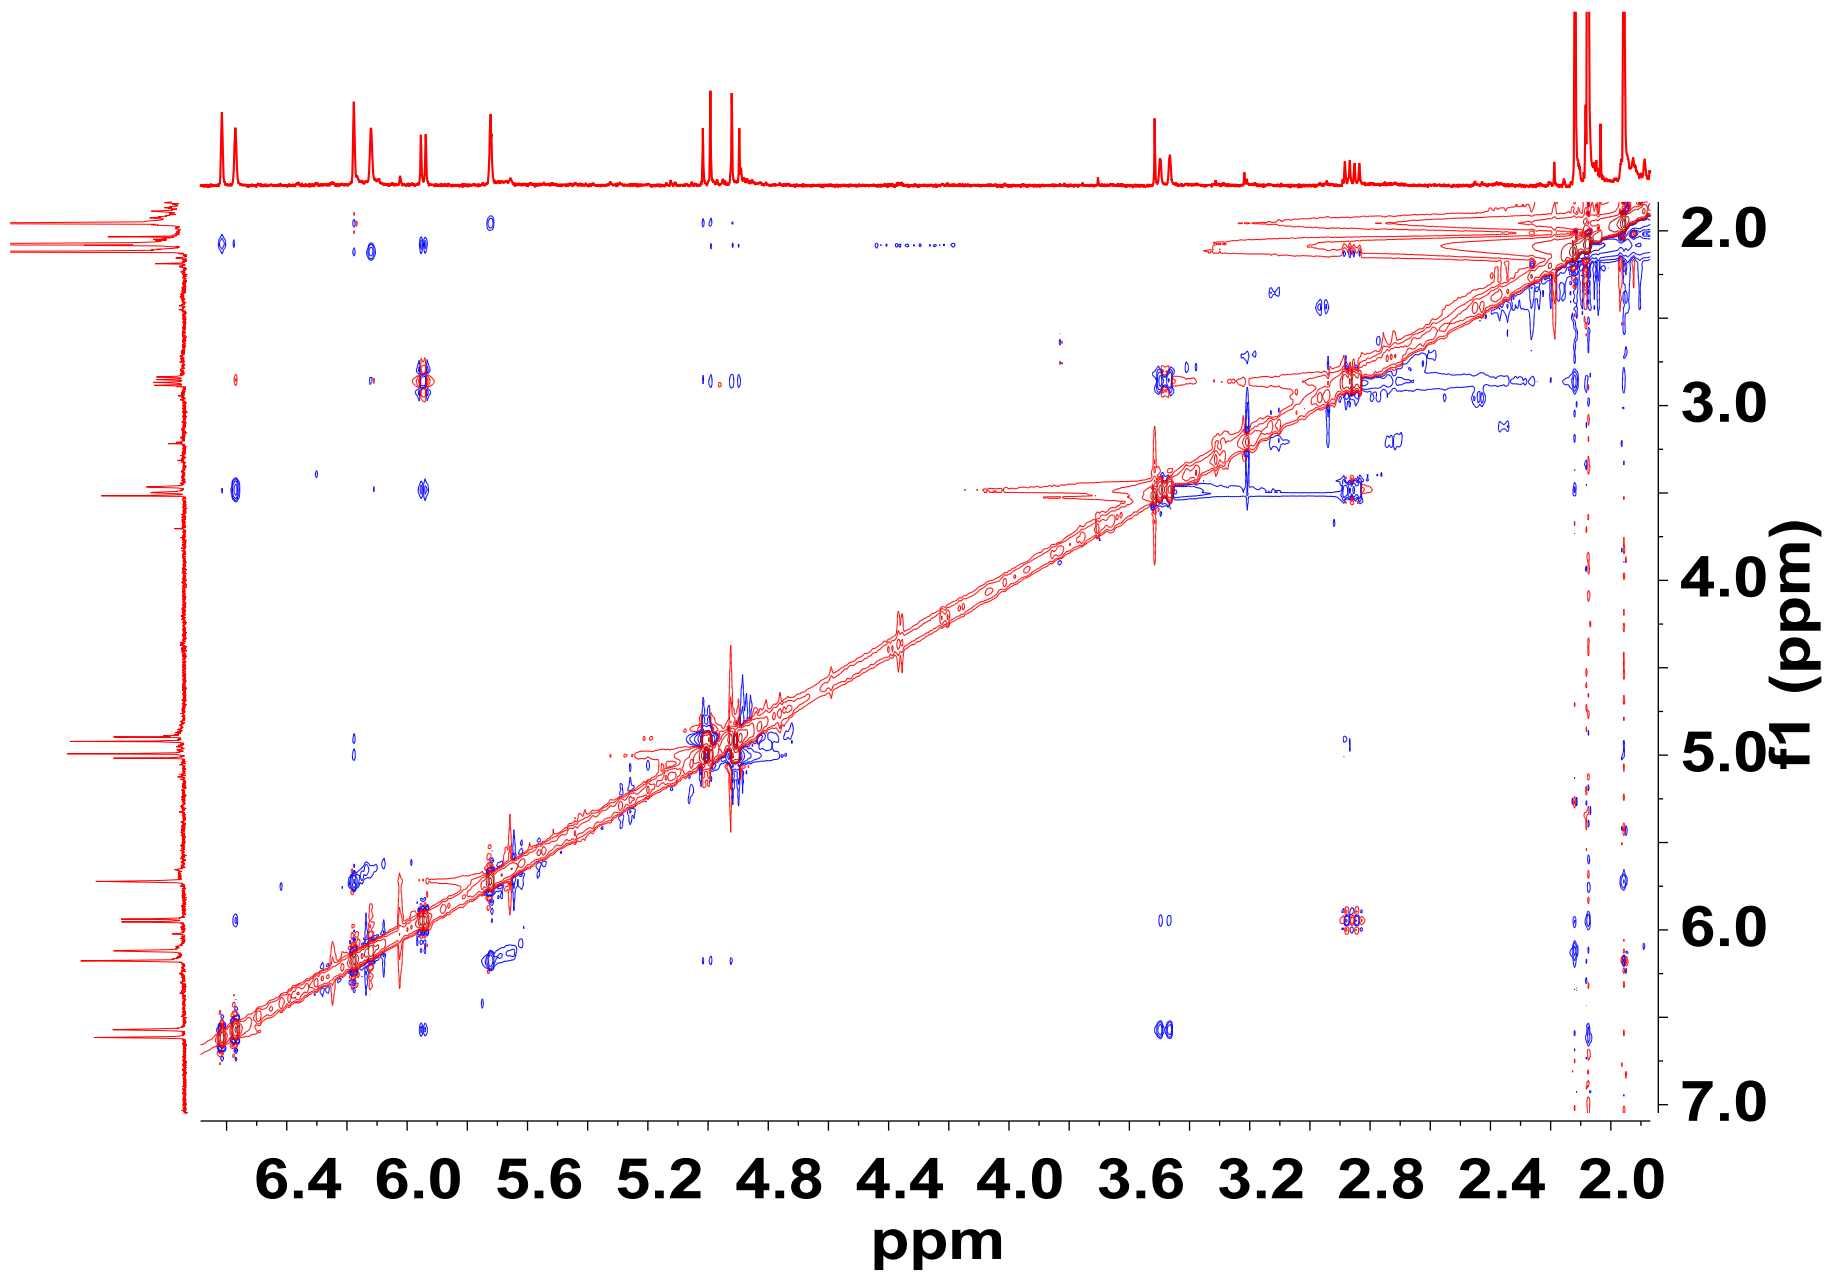

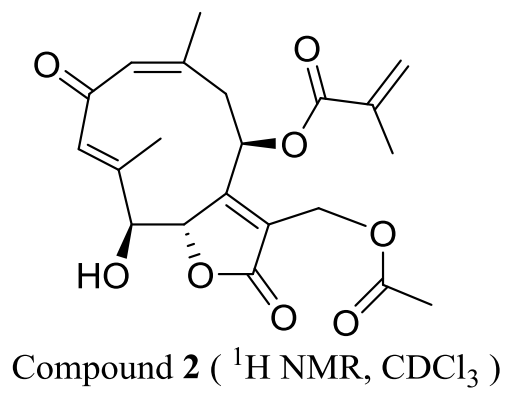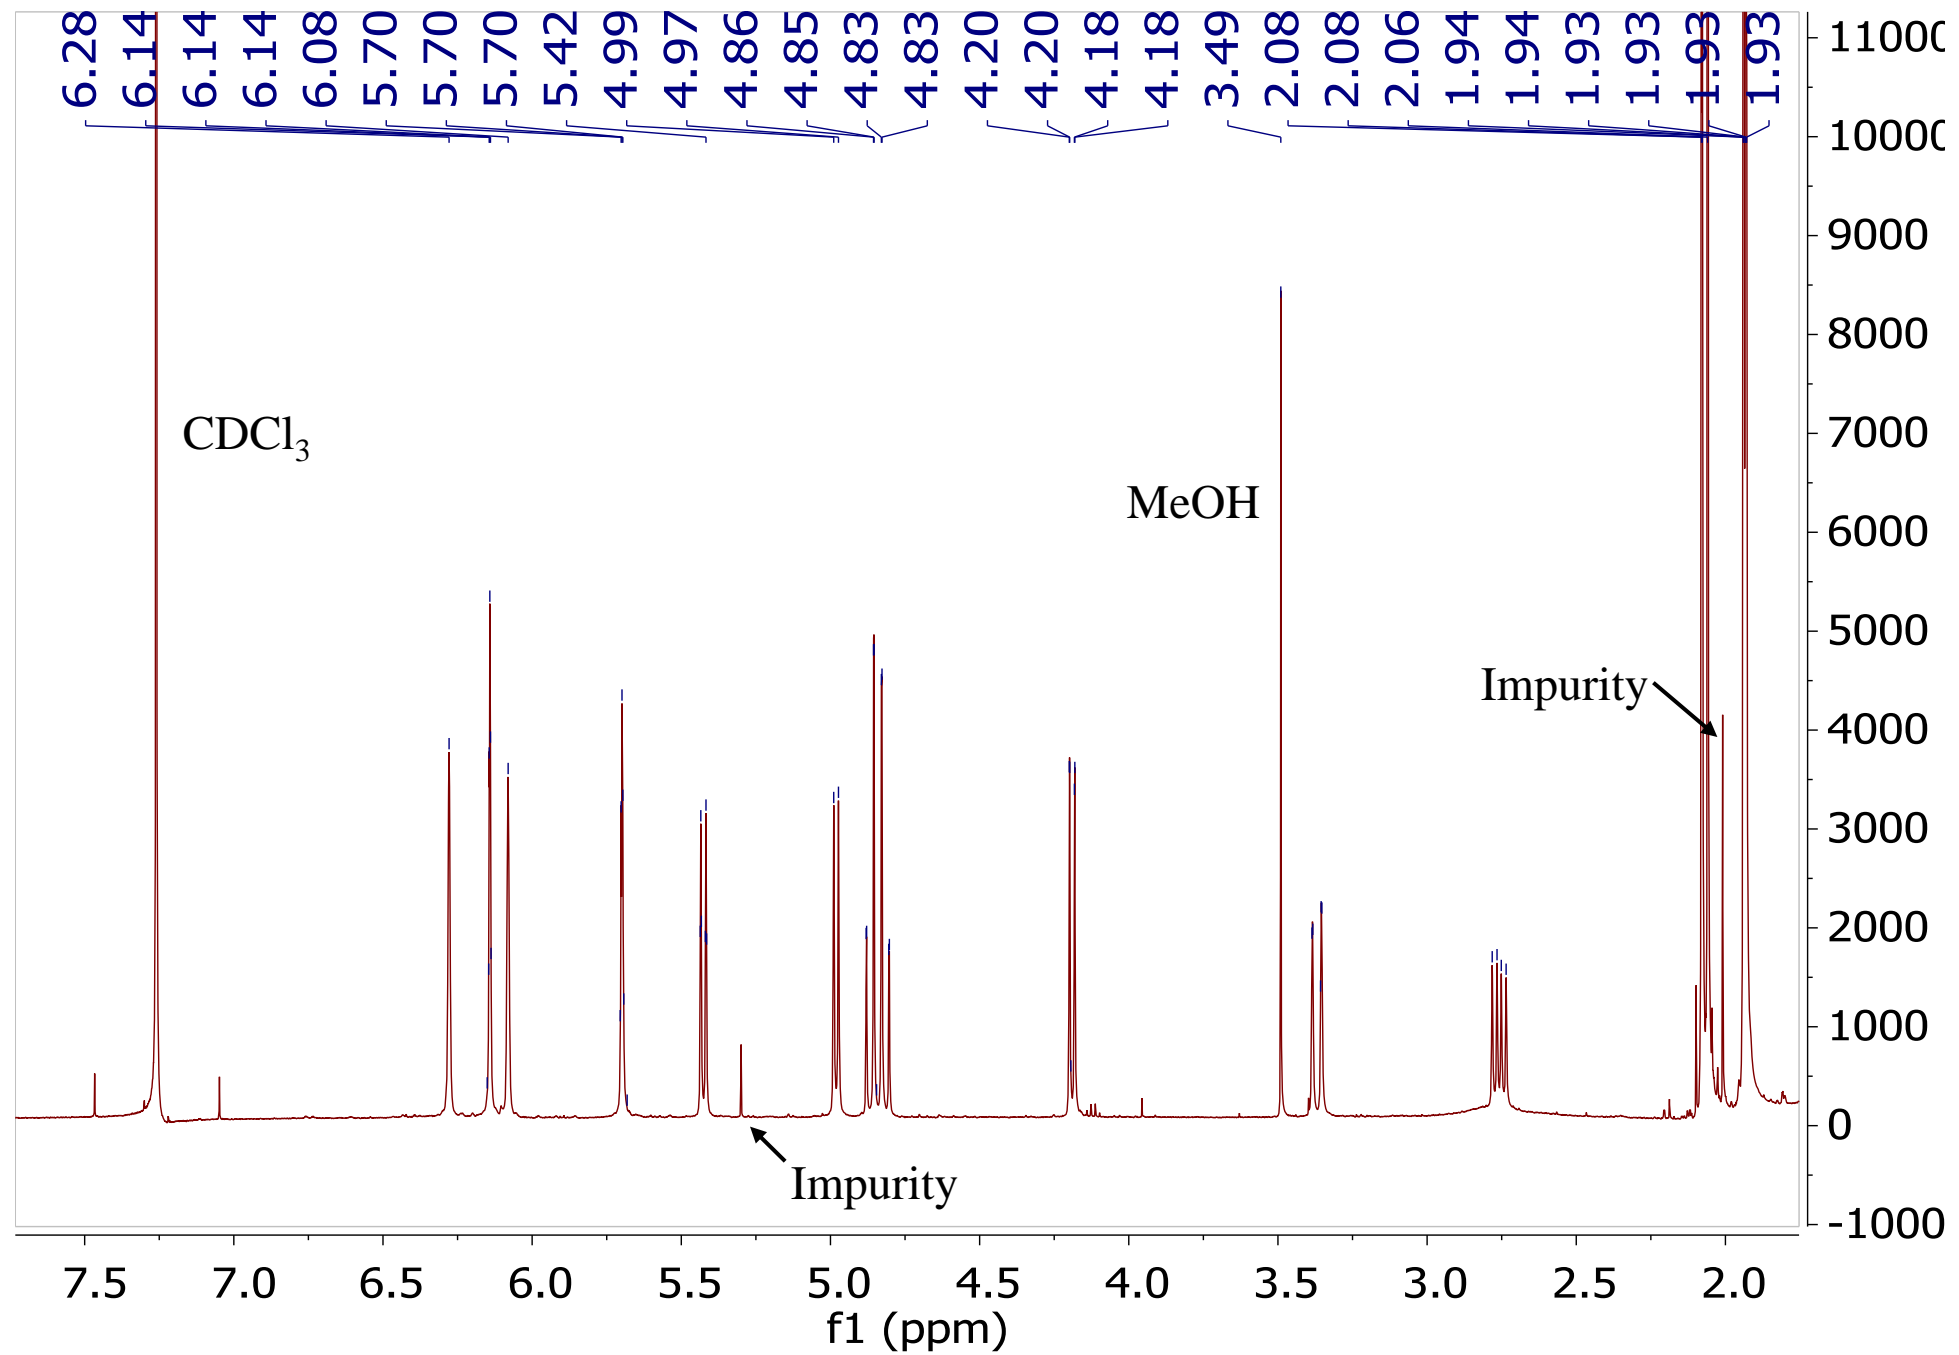

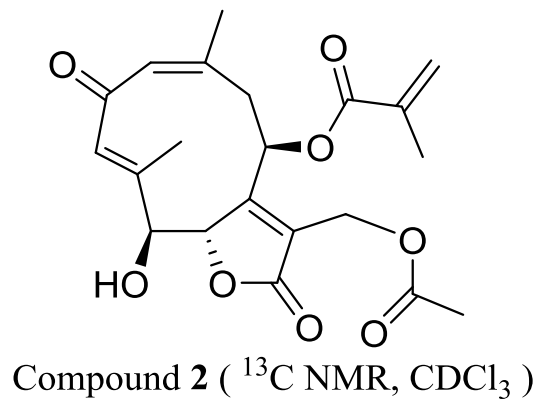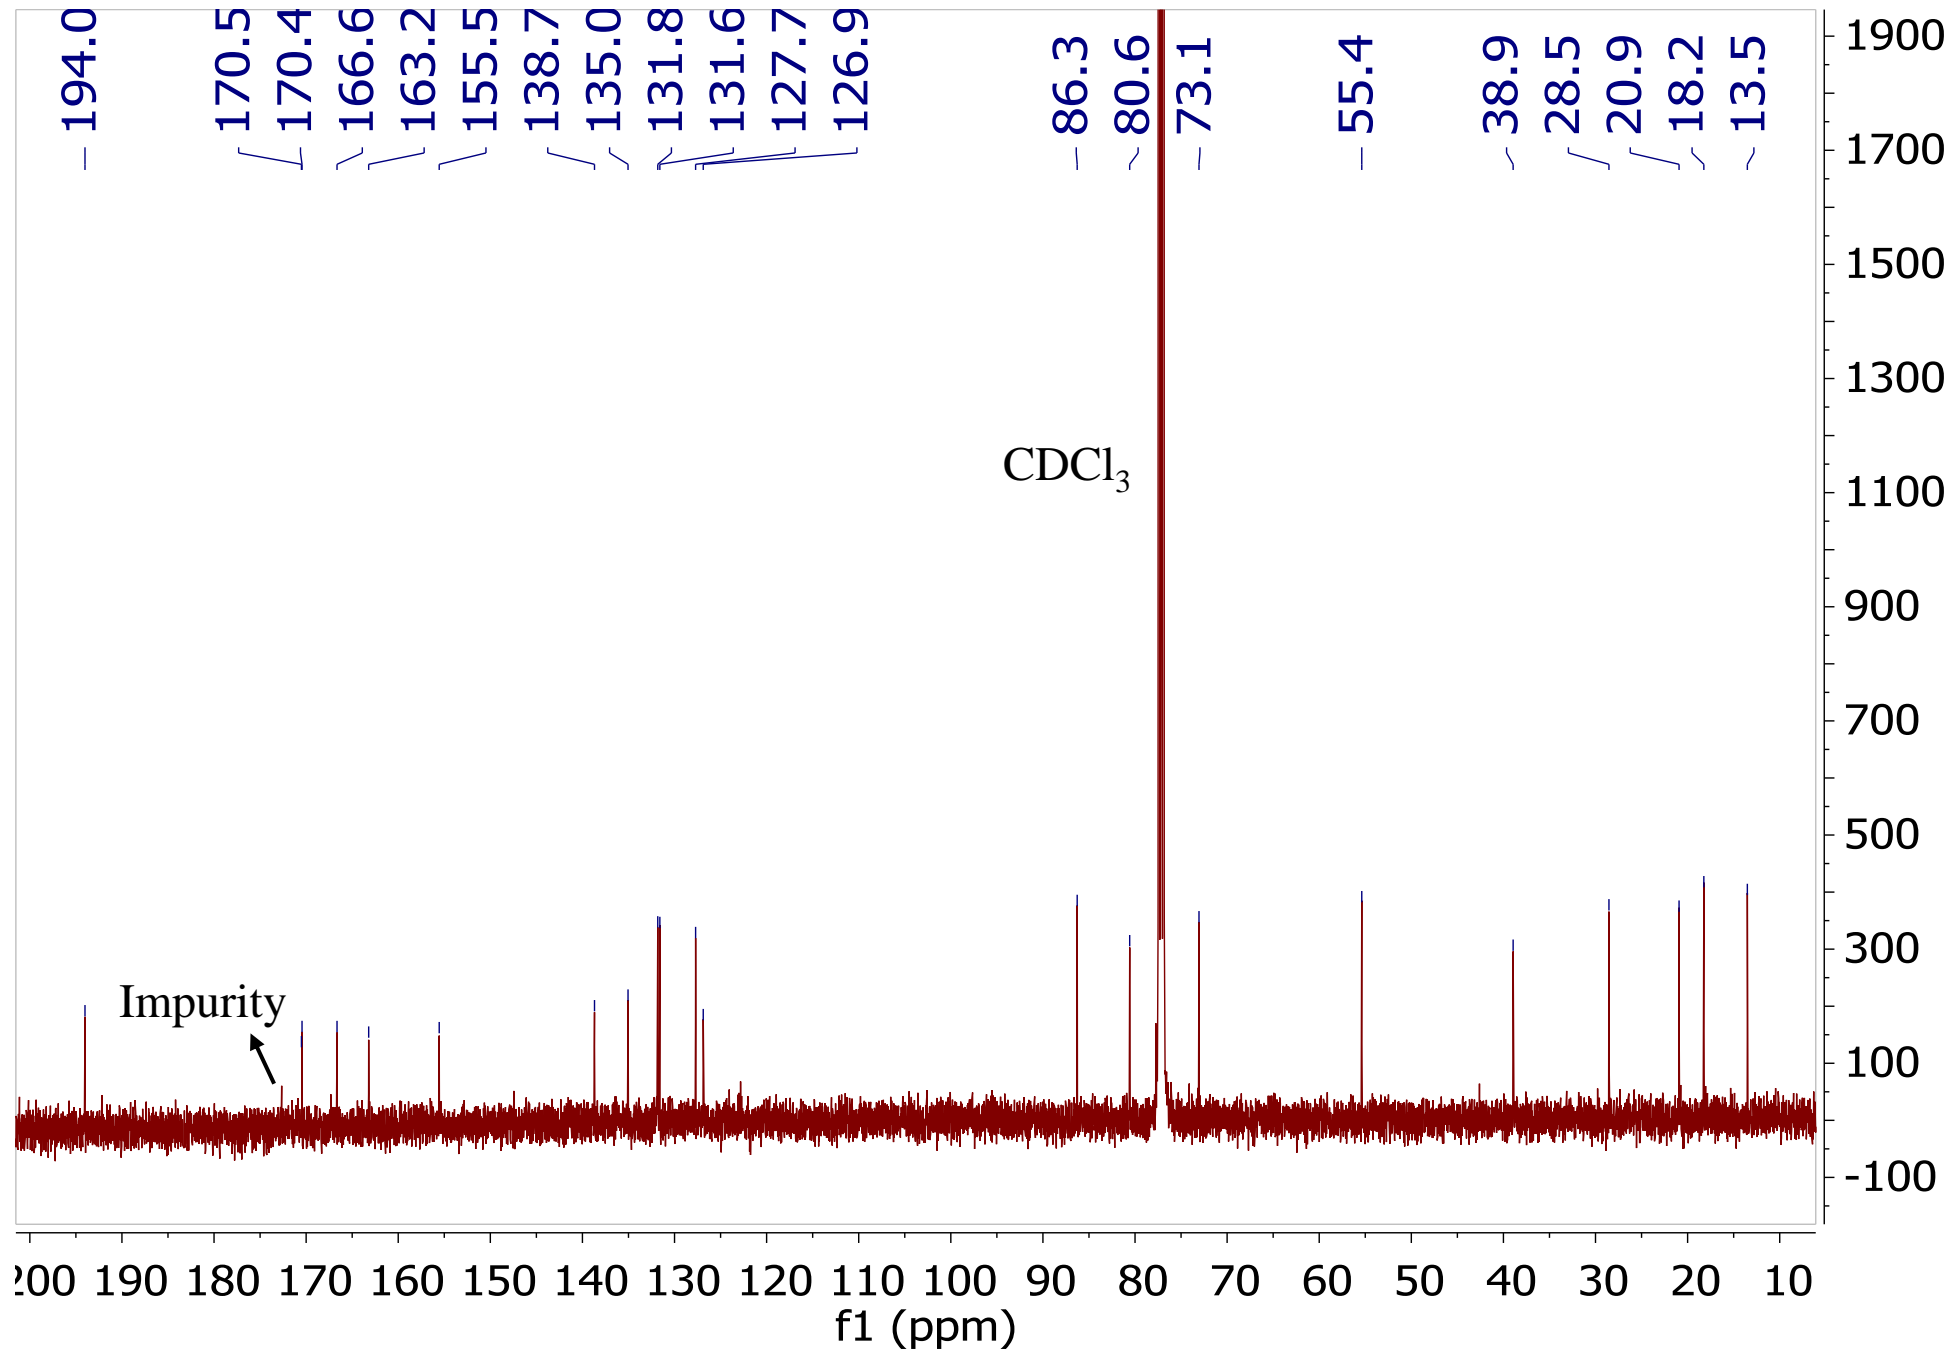



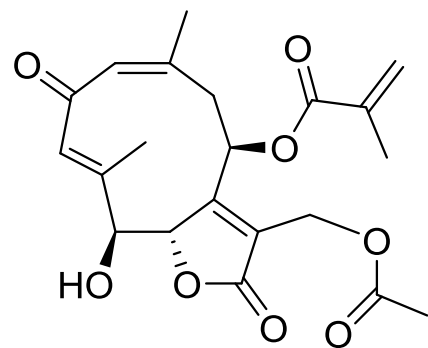

Compound **2** ( gHSQC, CDCl<sub>3</sub> )

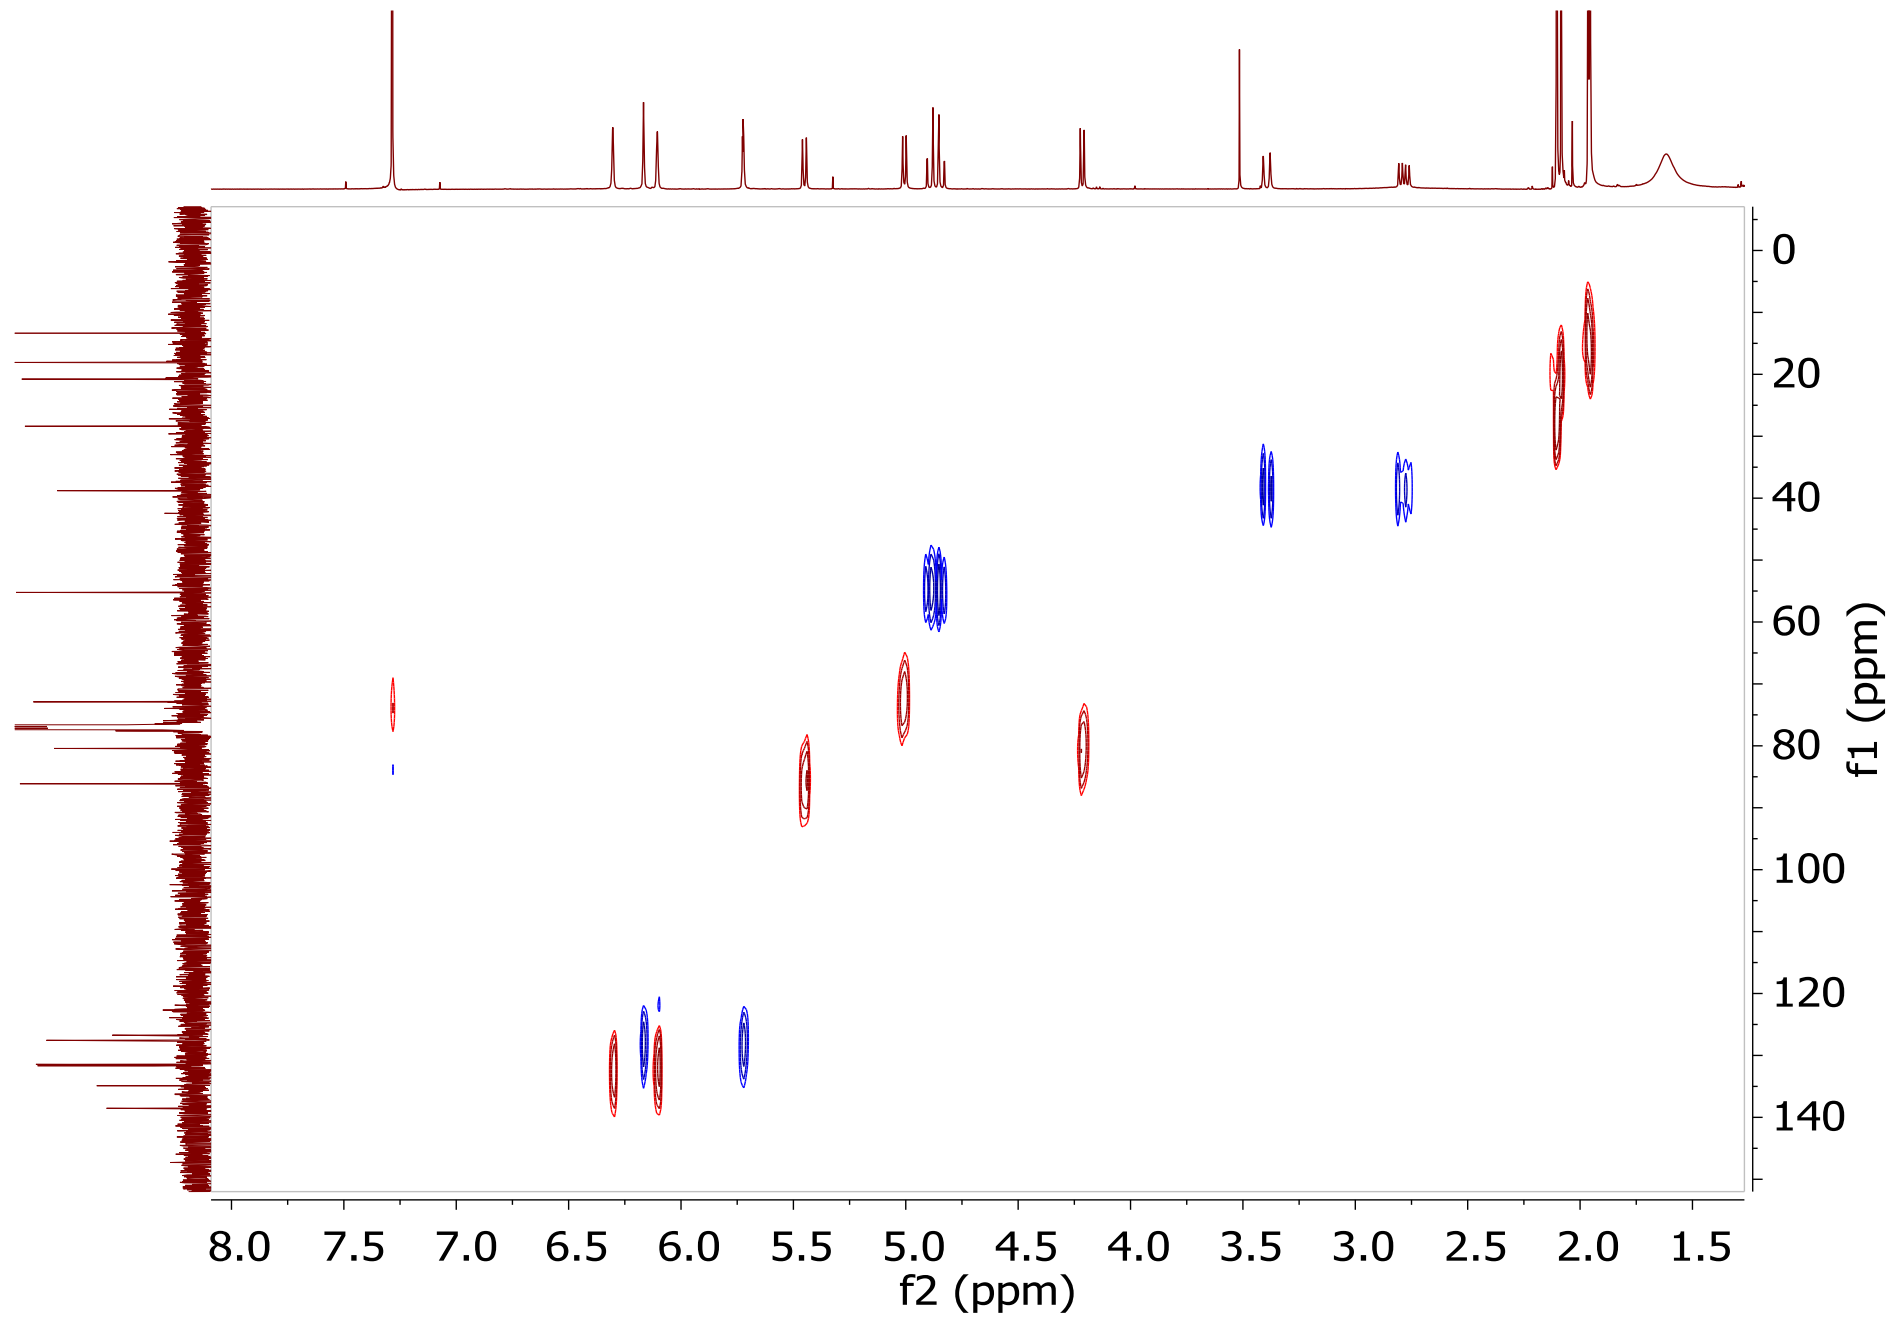

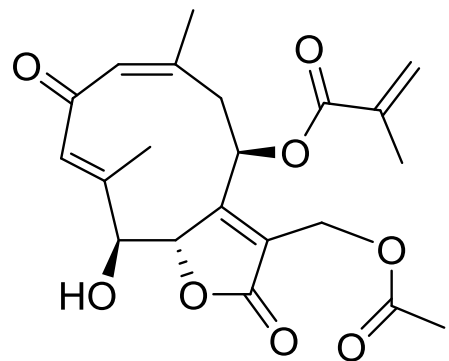

Compound 2 ( gHMBC, CDCl<sub>3</sub> )

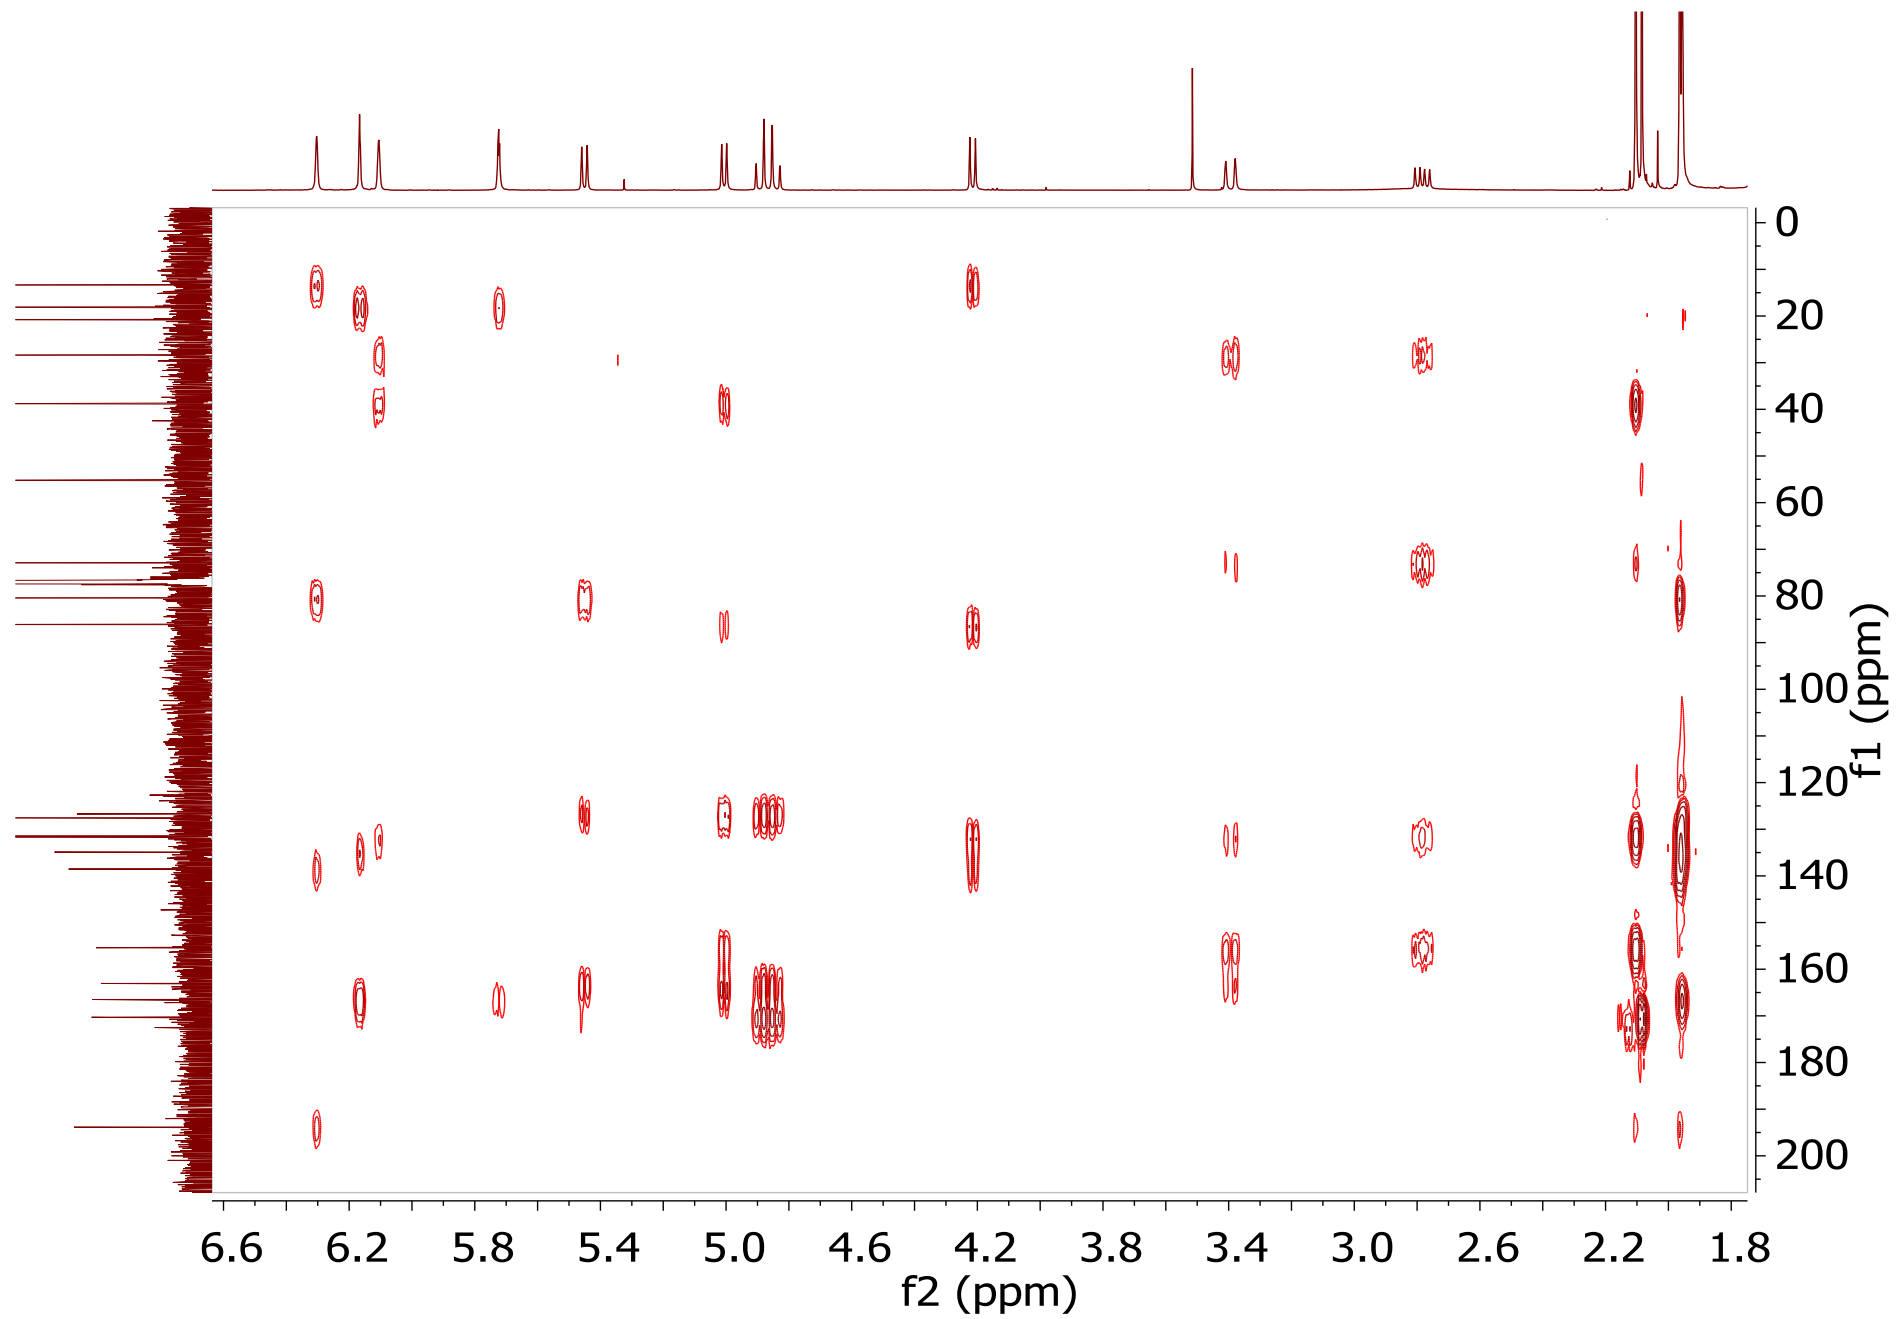

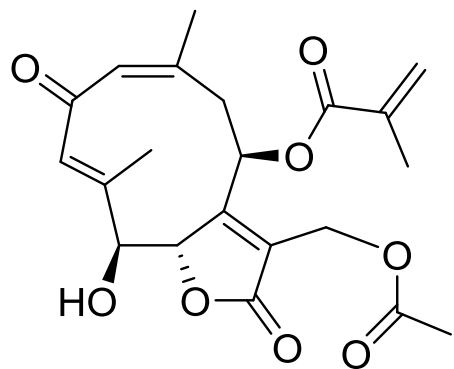

Compound **2** ( NOESY, CDCl<sub>3</sub> )

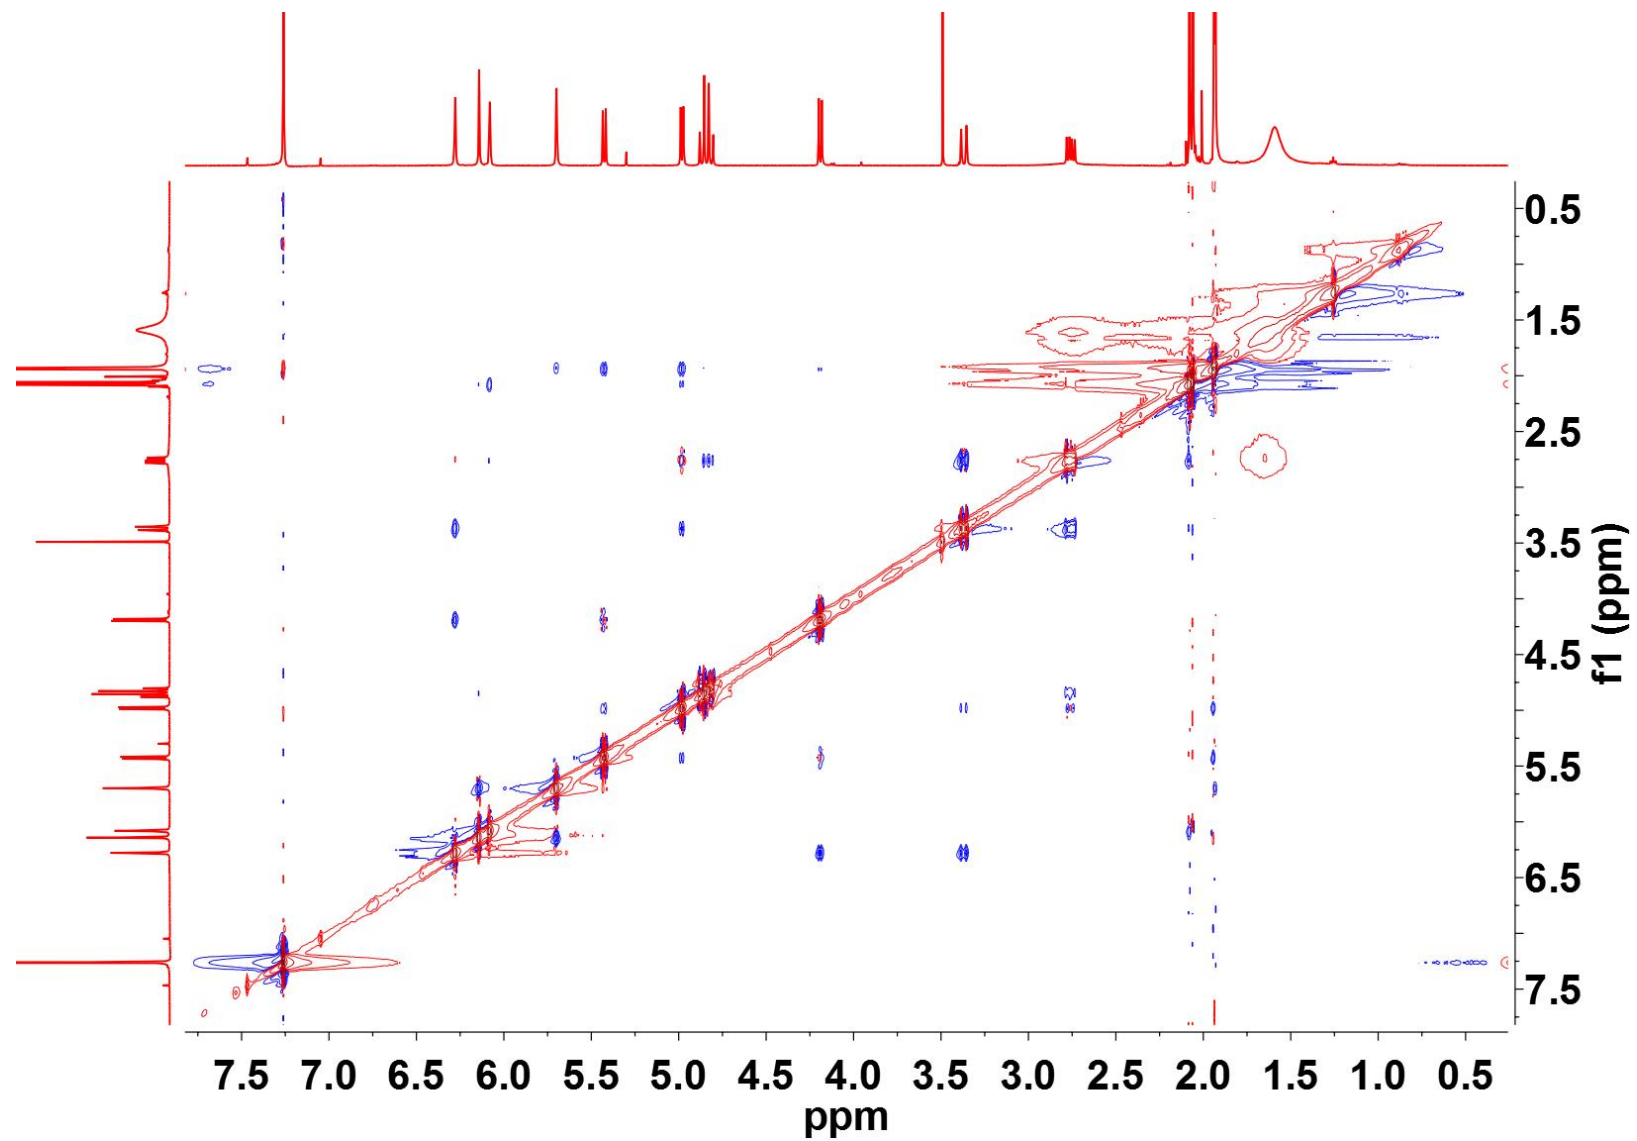

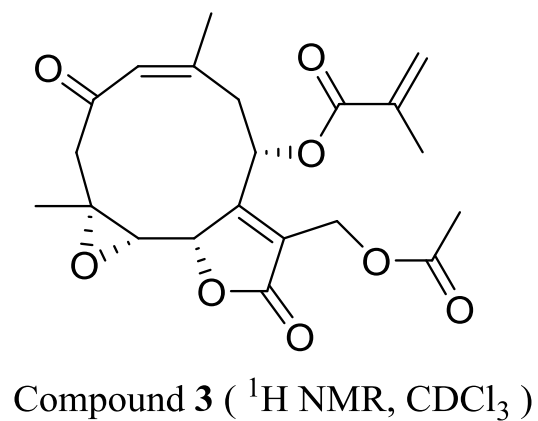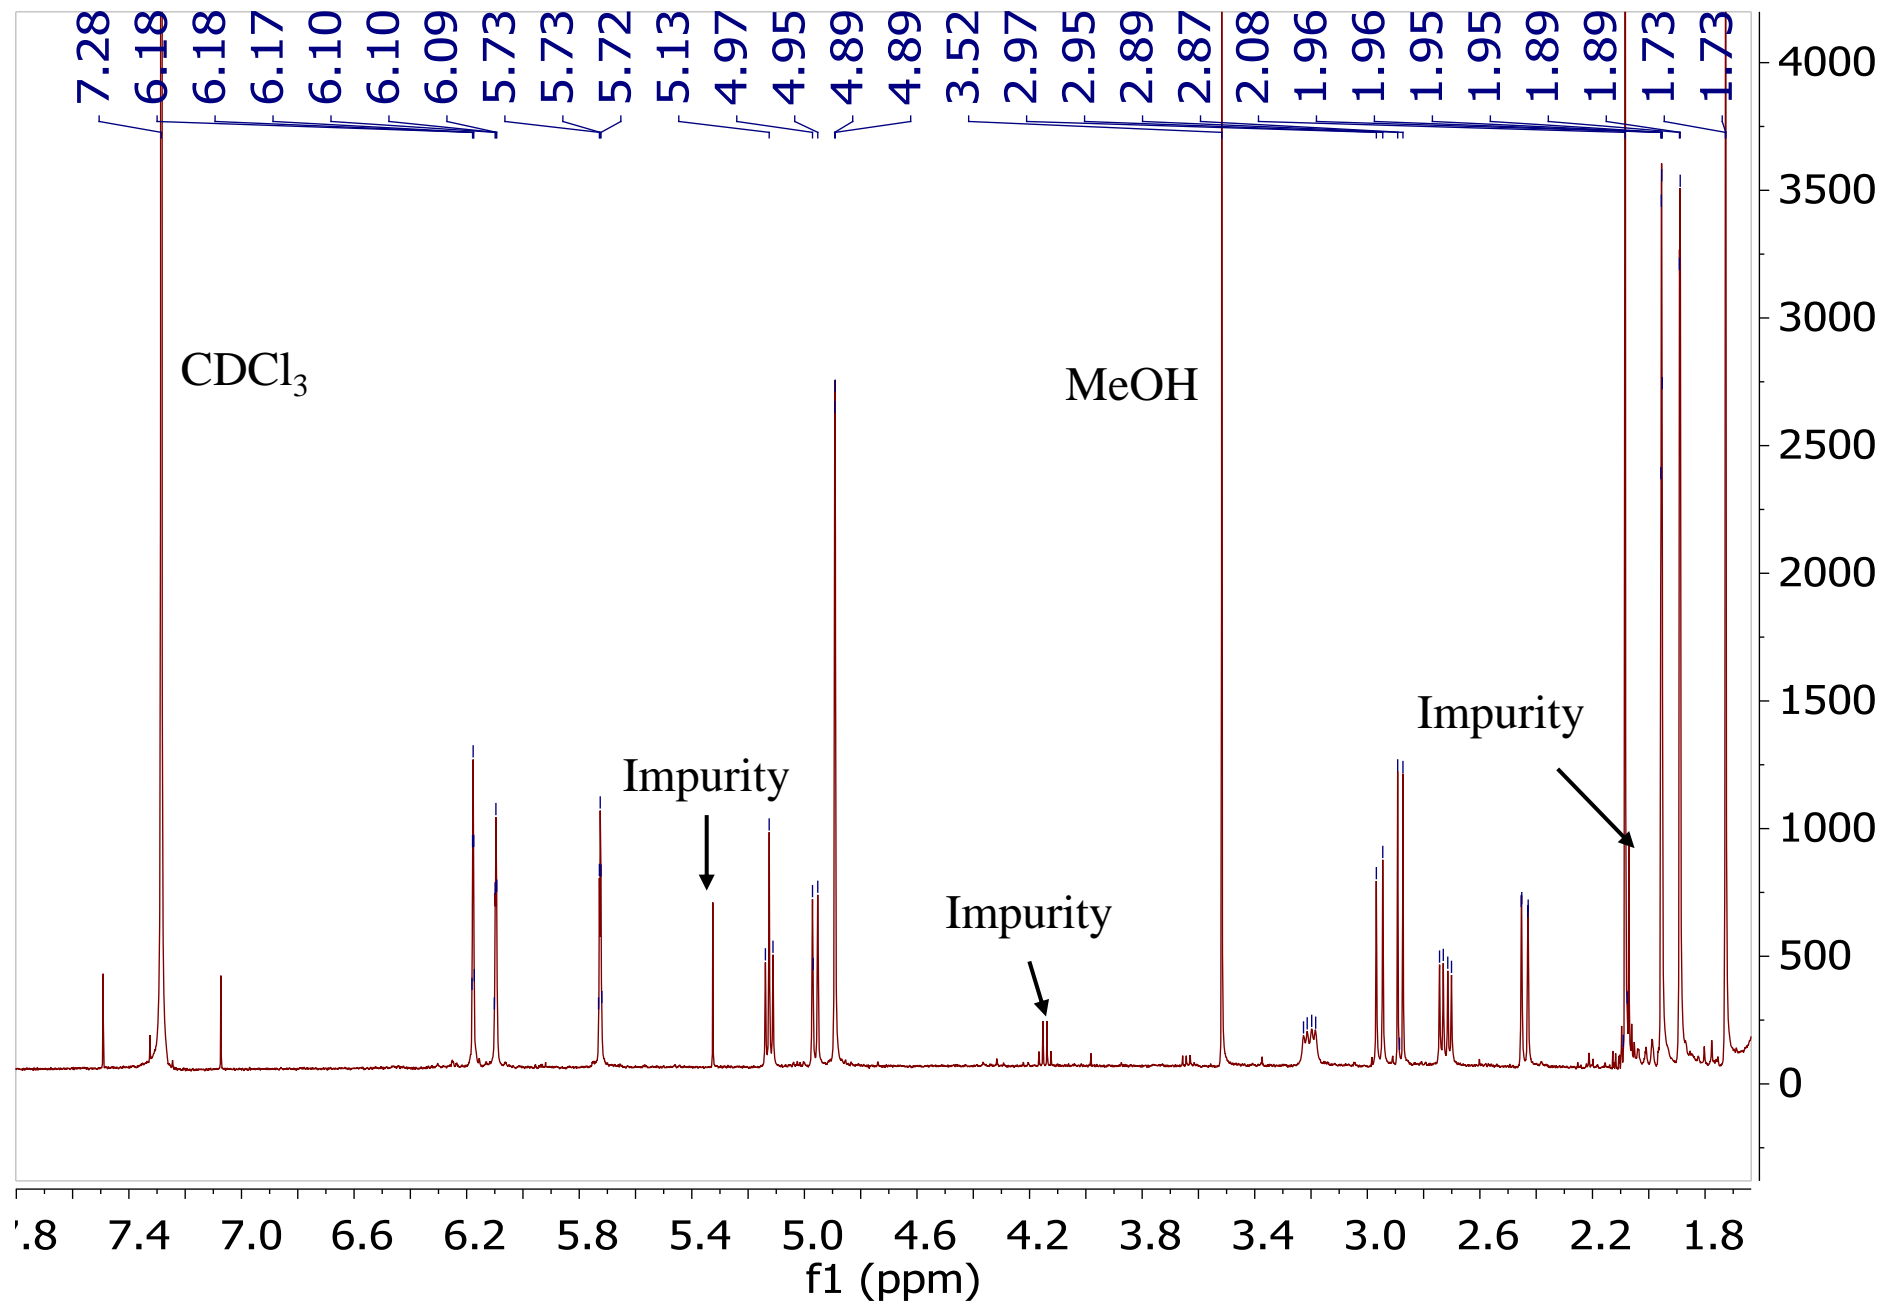

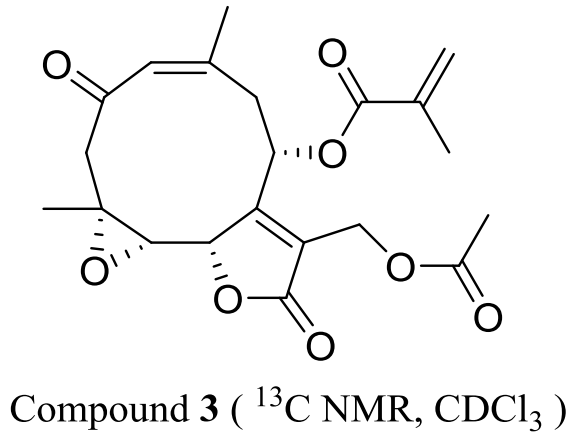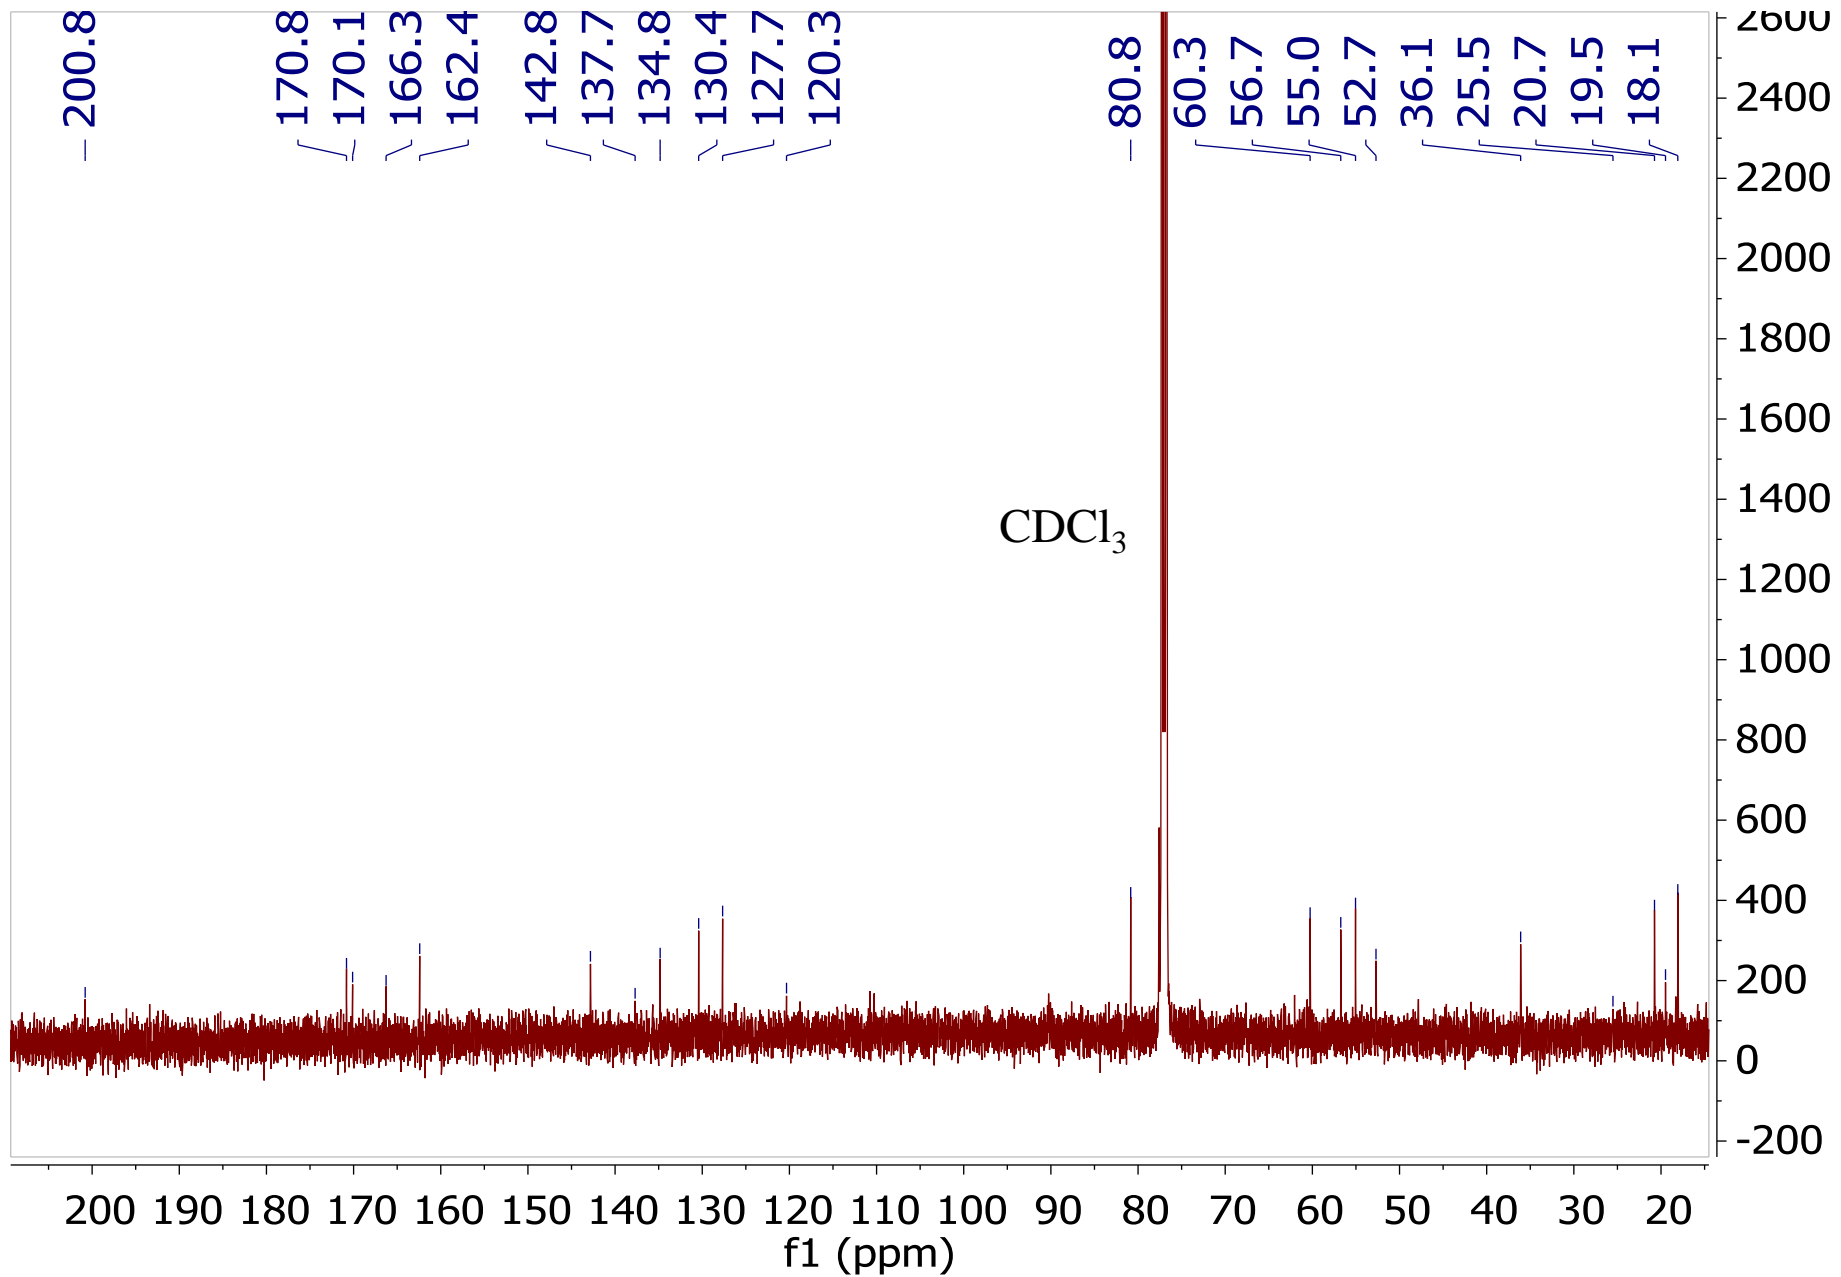

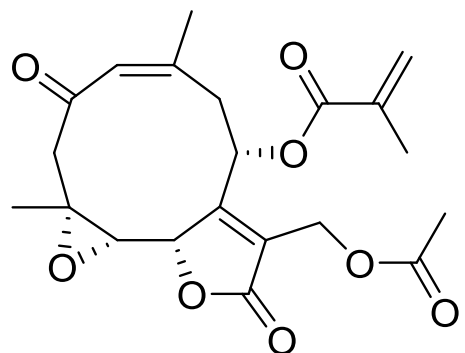

Compound **3** ( gHSQC, CDCl<sub>3</sub> )

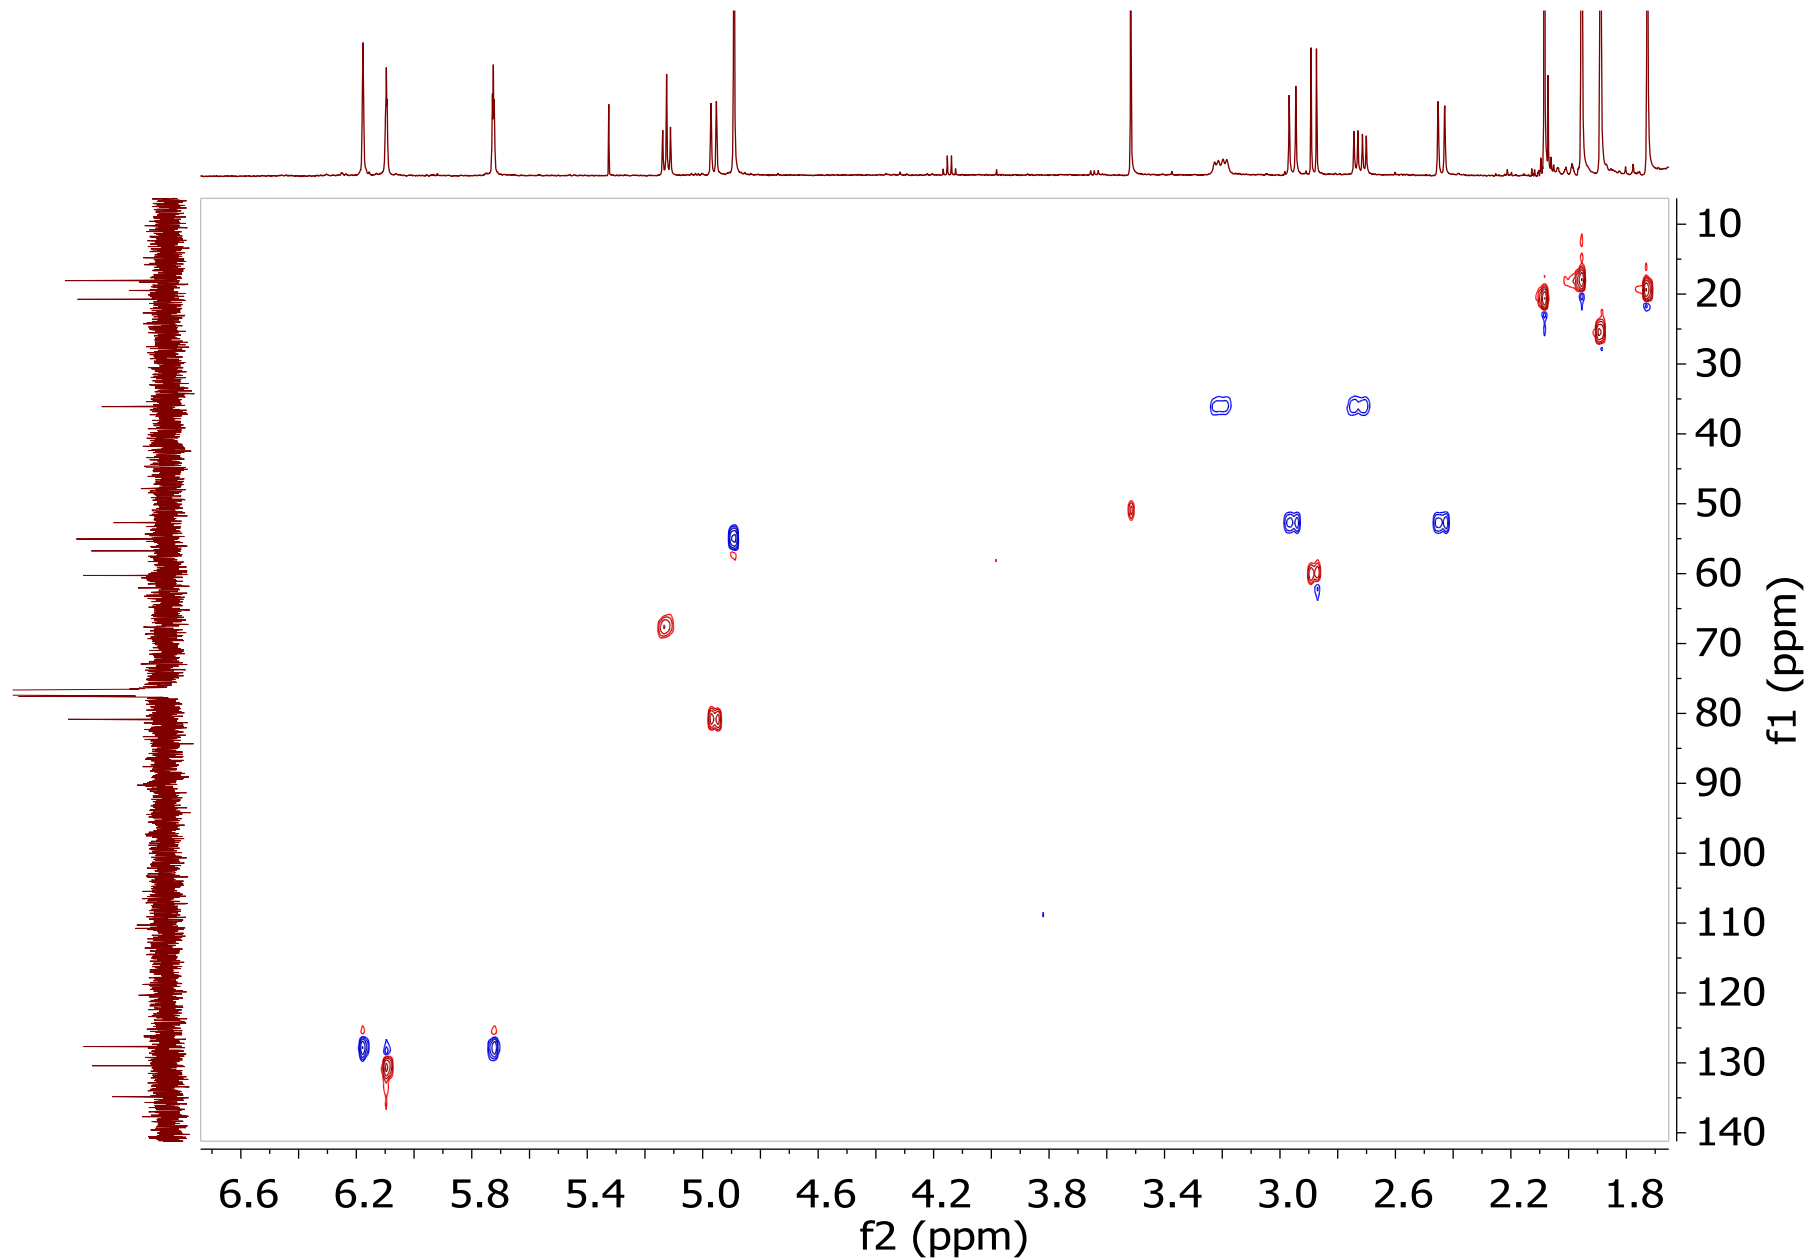

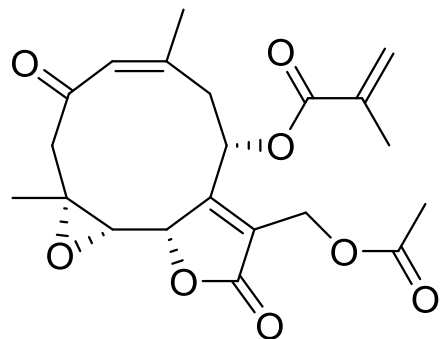

Compound 3 ( gHMBC, CDCl<sub>3</sub> )

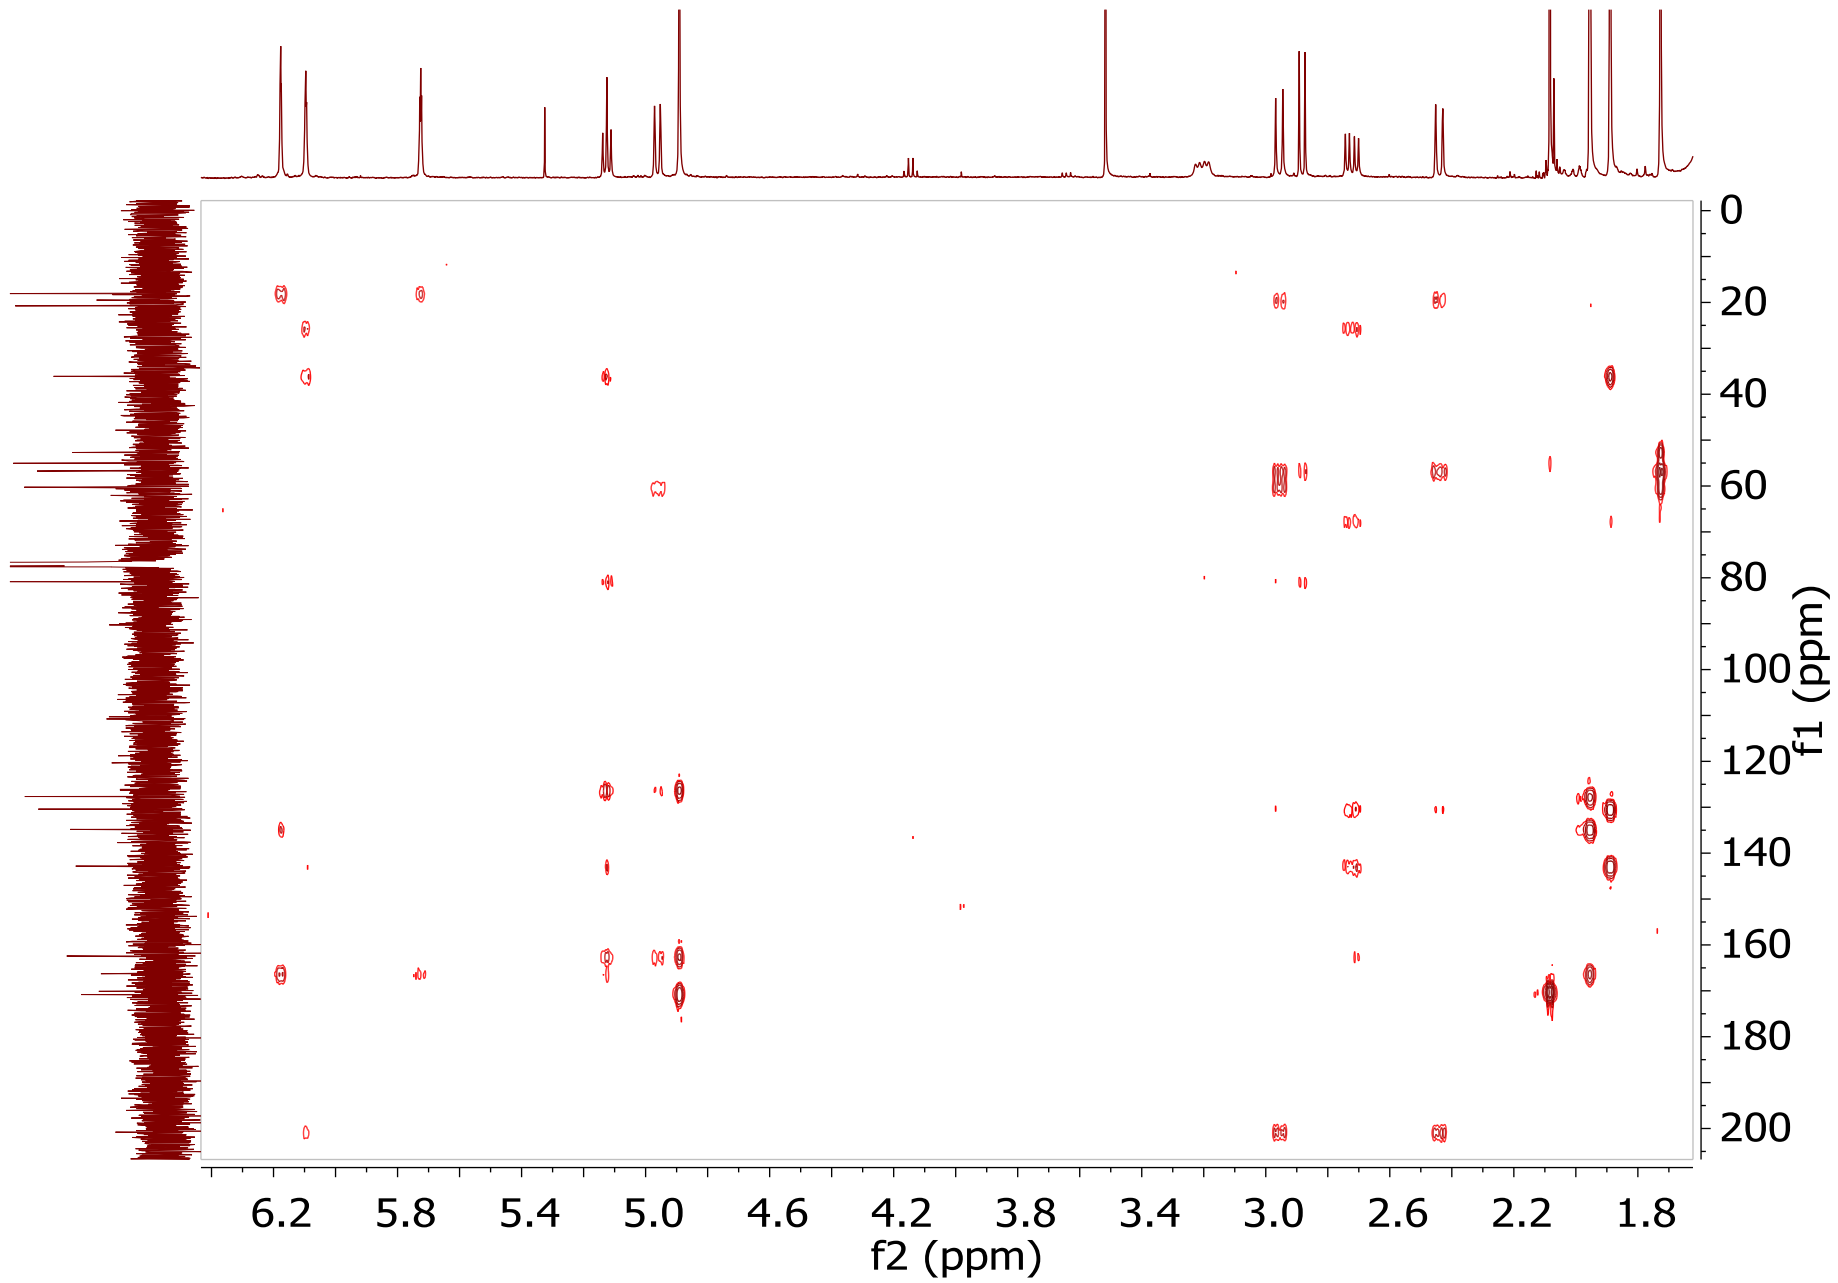

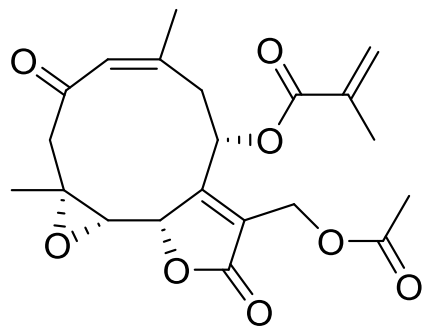

Compound **3** ( NOESY,  $\text{CDCl}_3$  )

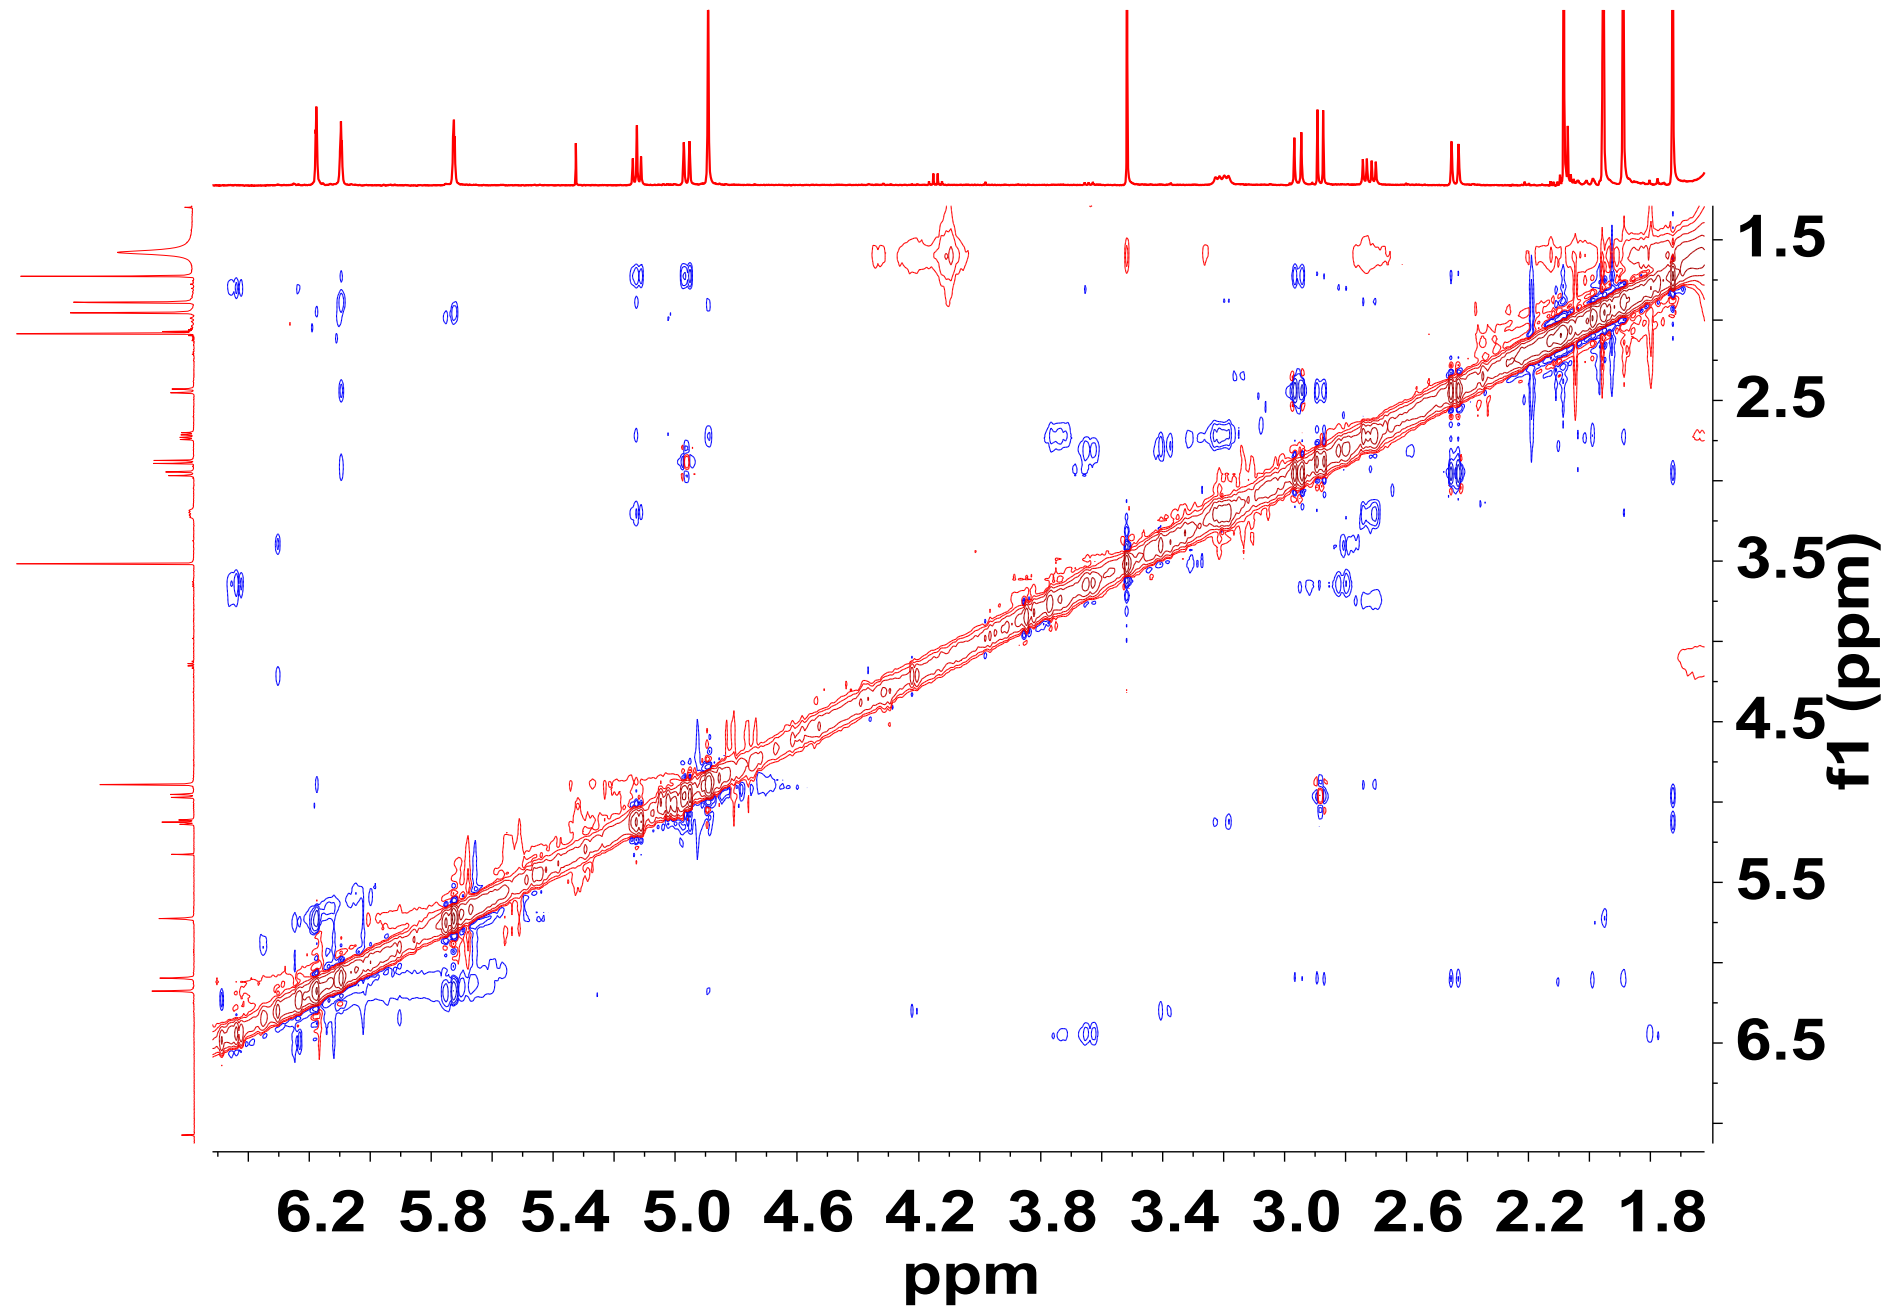



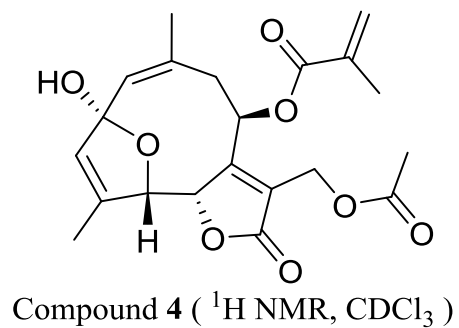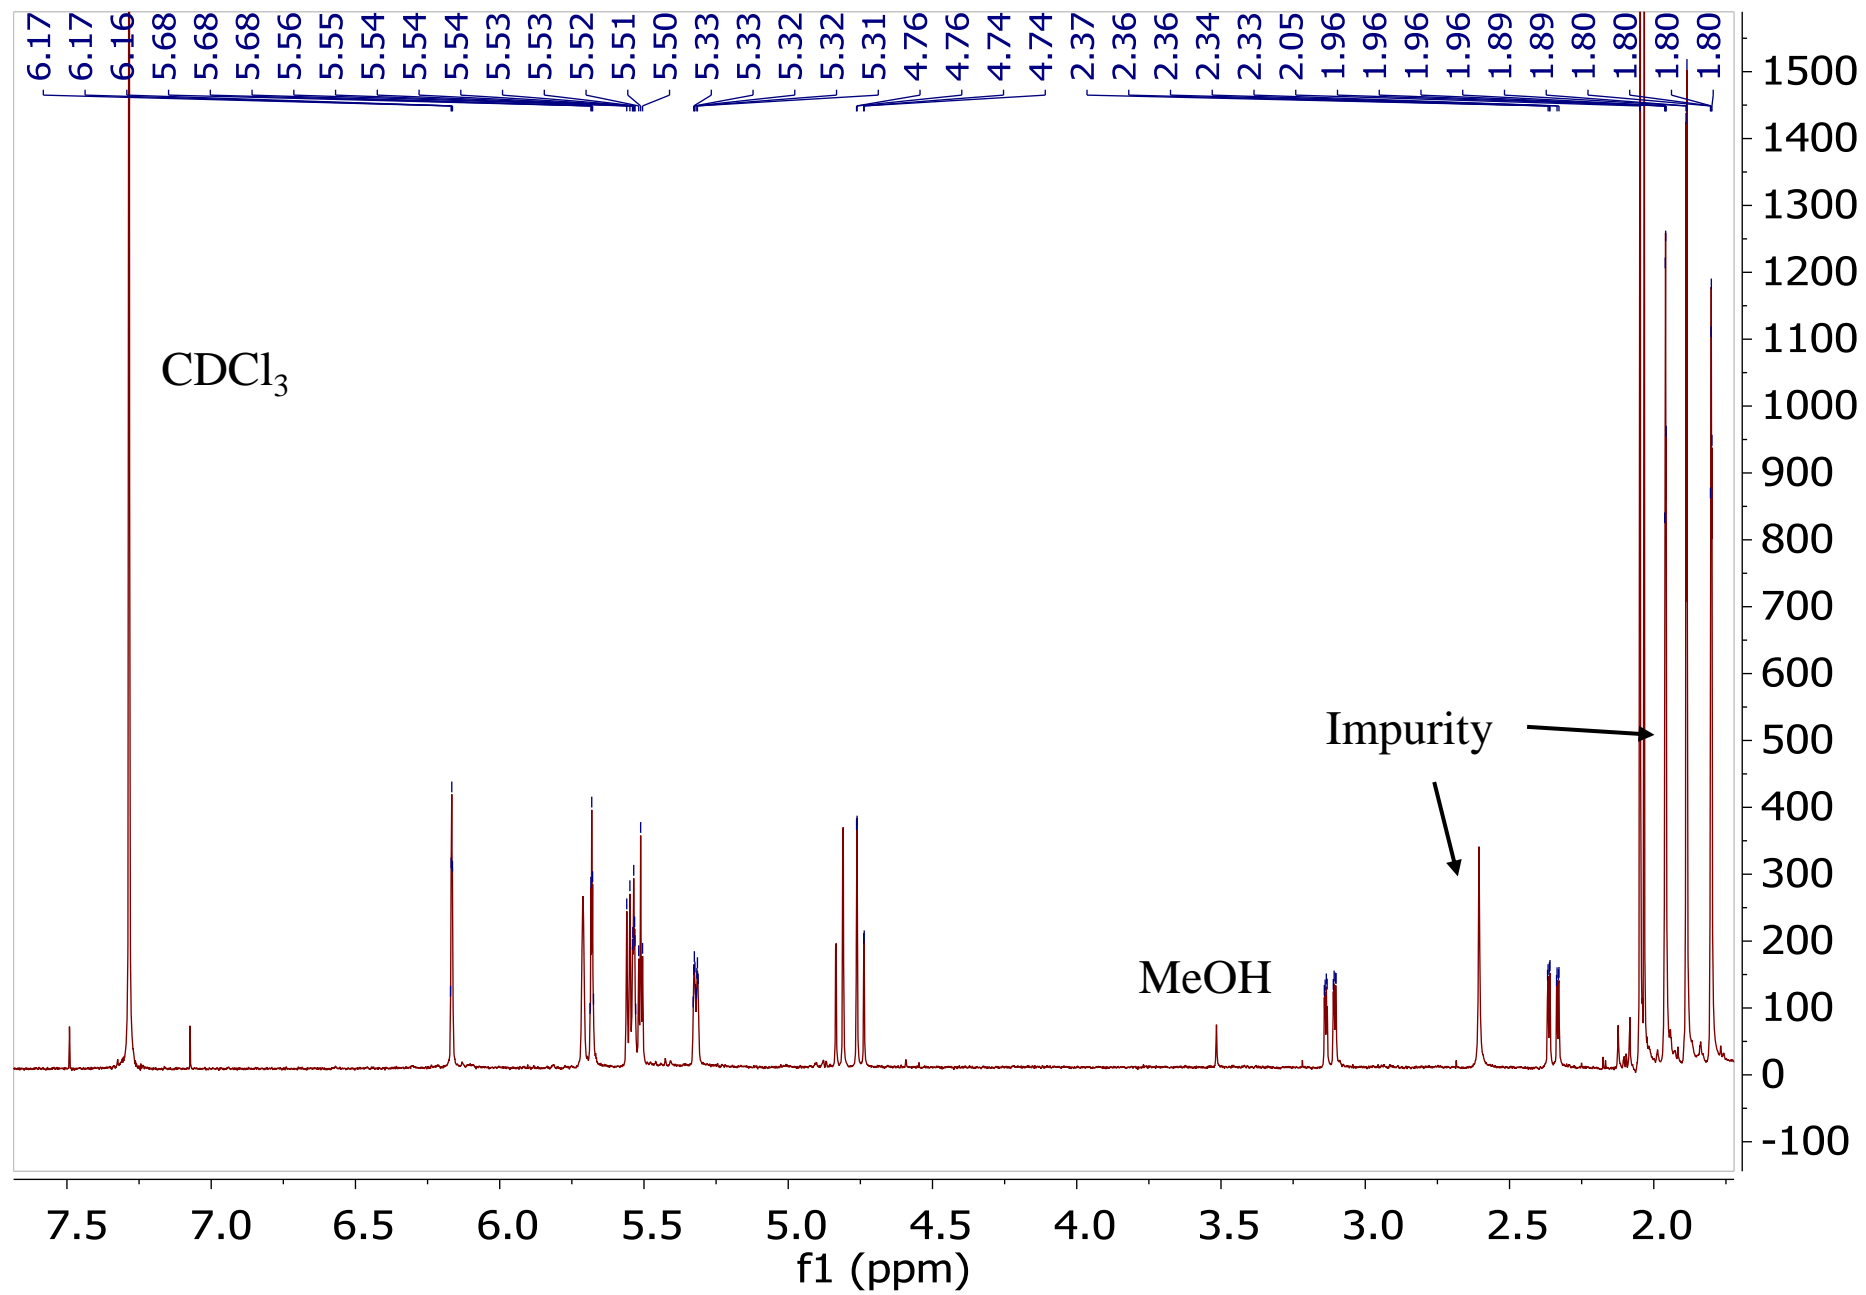

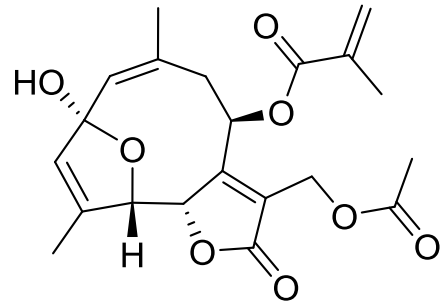

Compound 4 ( $^{13}\text{C}$  NMR,  $\text{CDCl}_3$ )

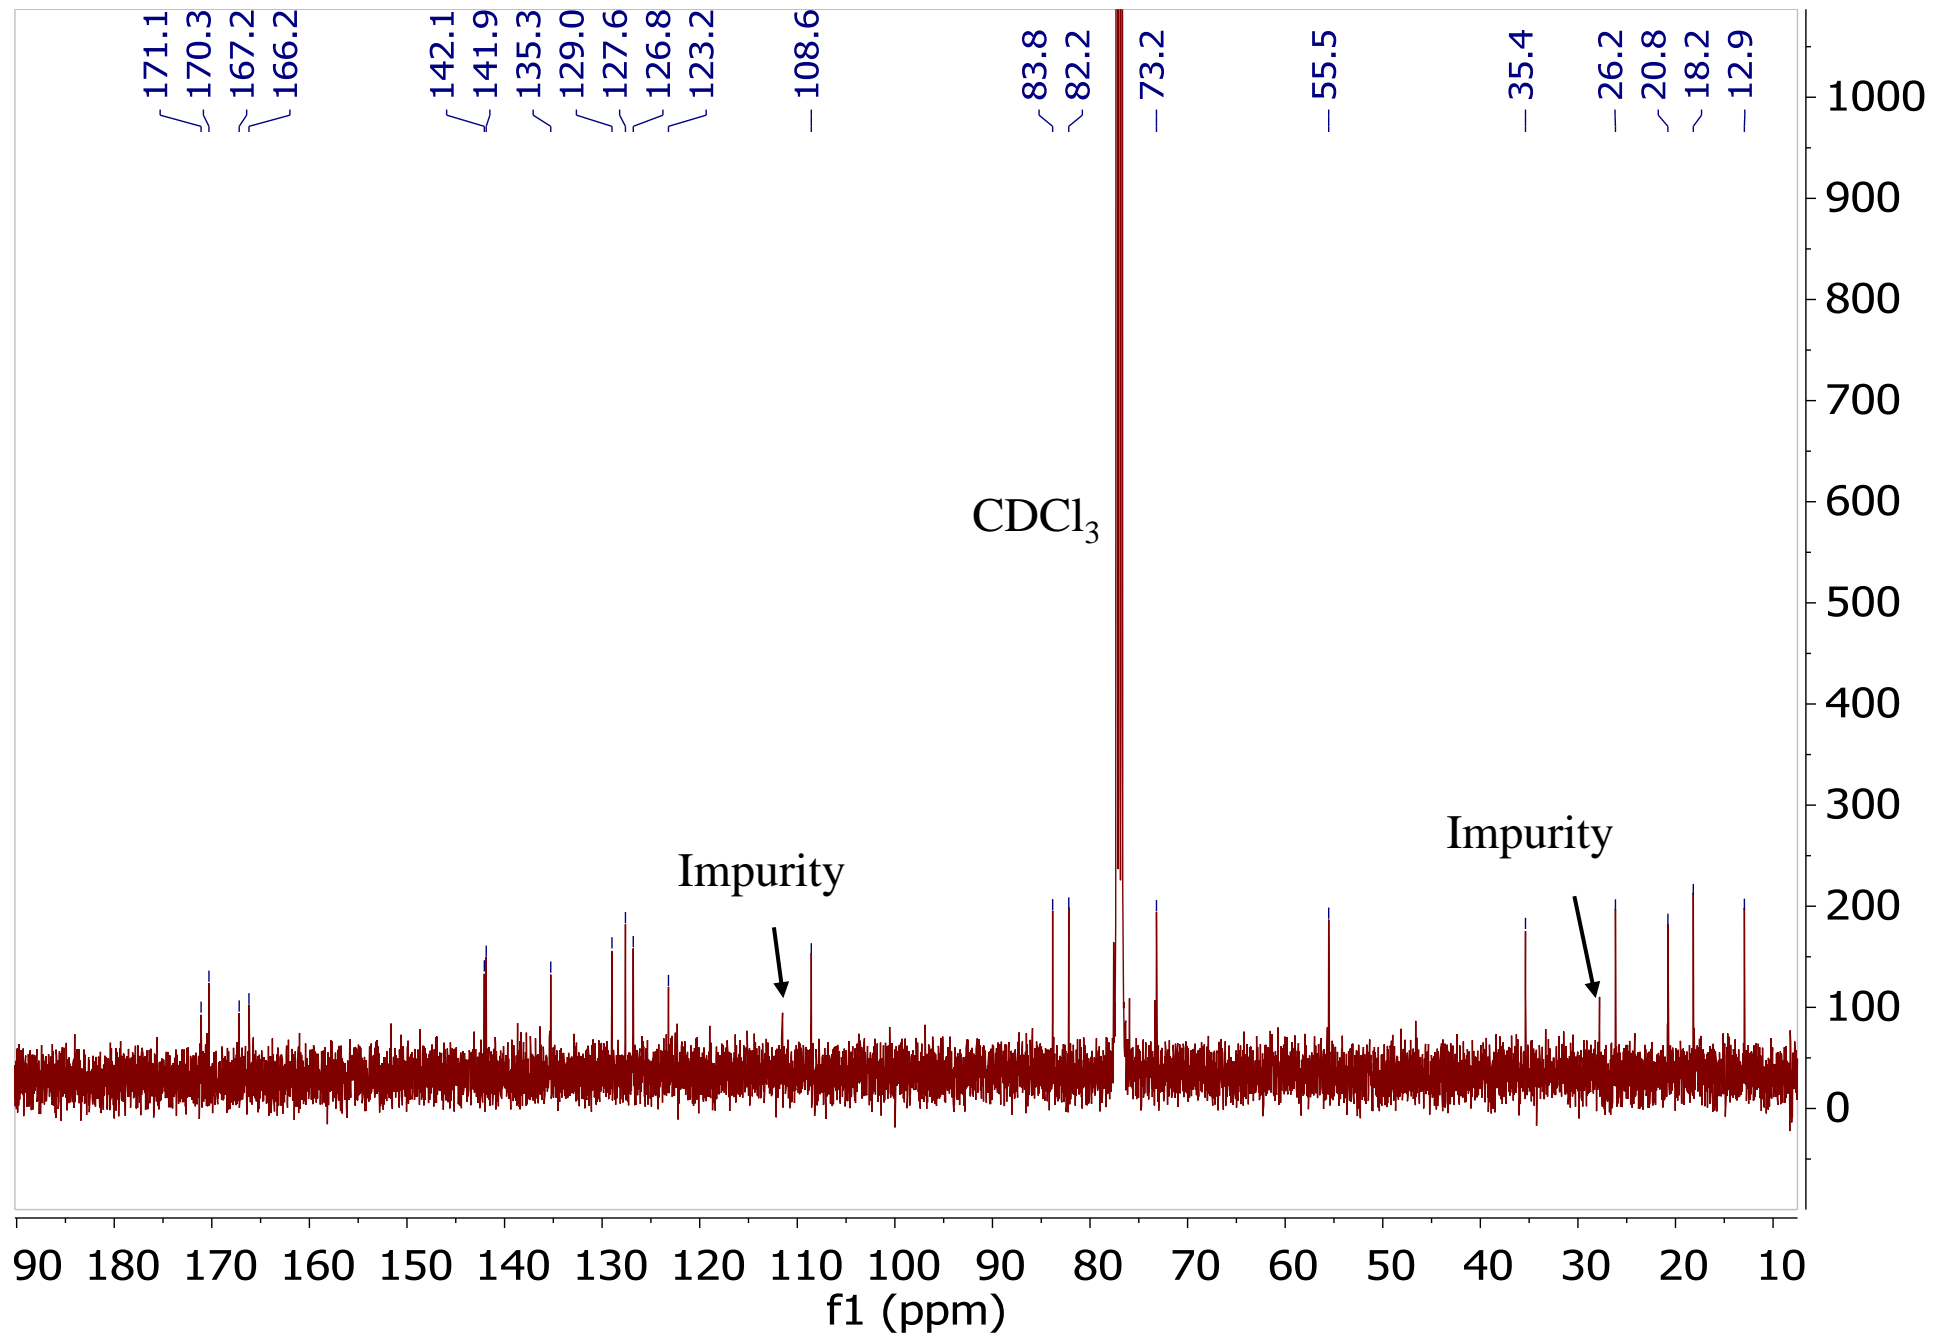

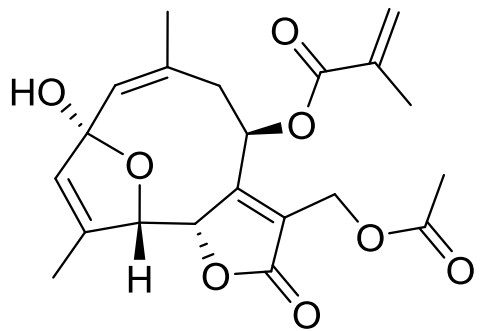

Compound 4 ( gHSQC, CDCl<sub>3</sub> )

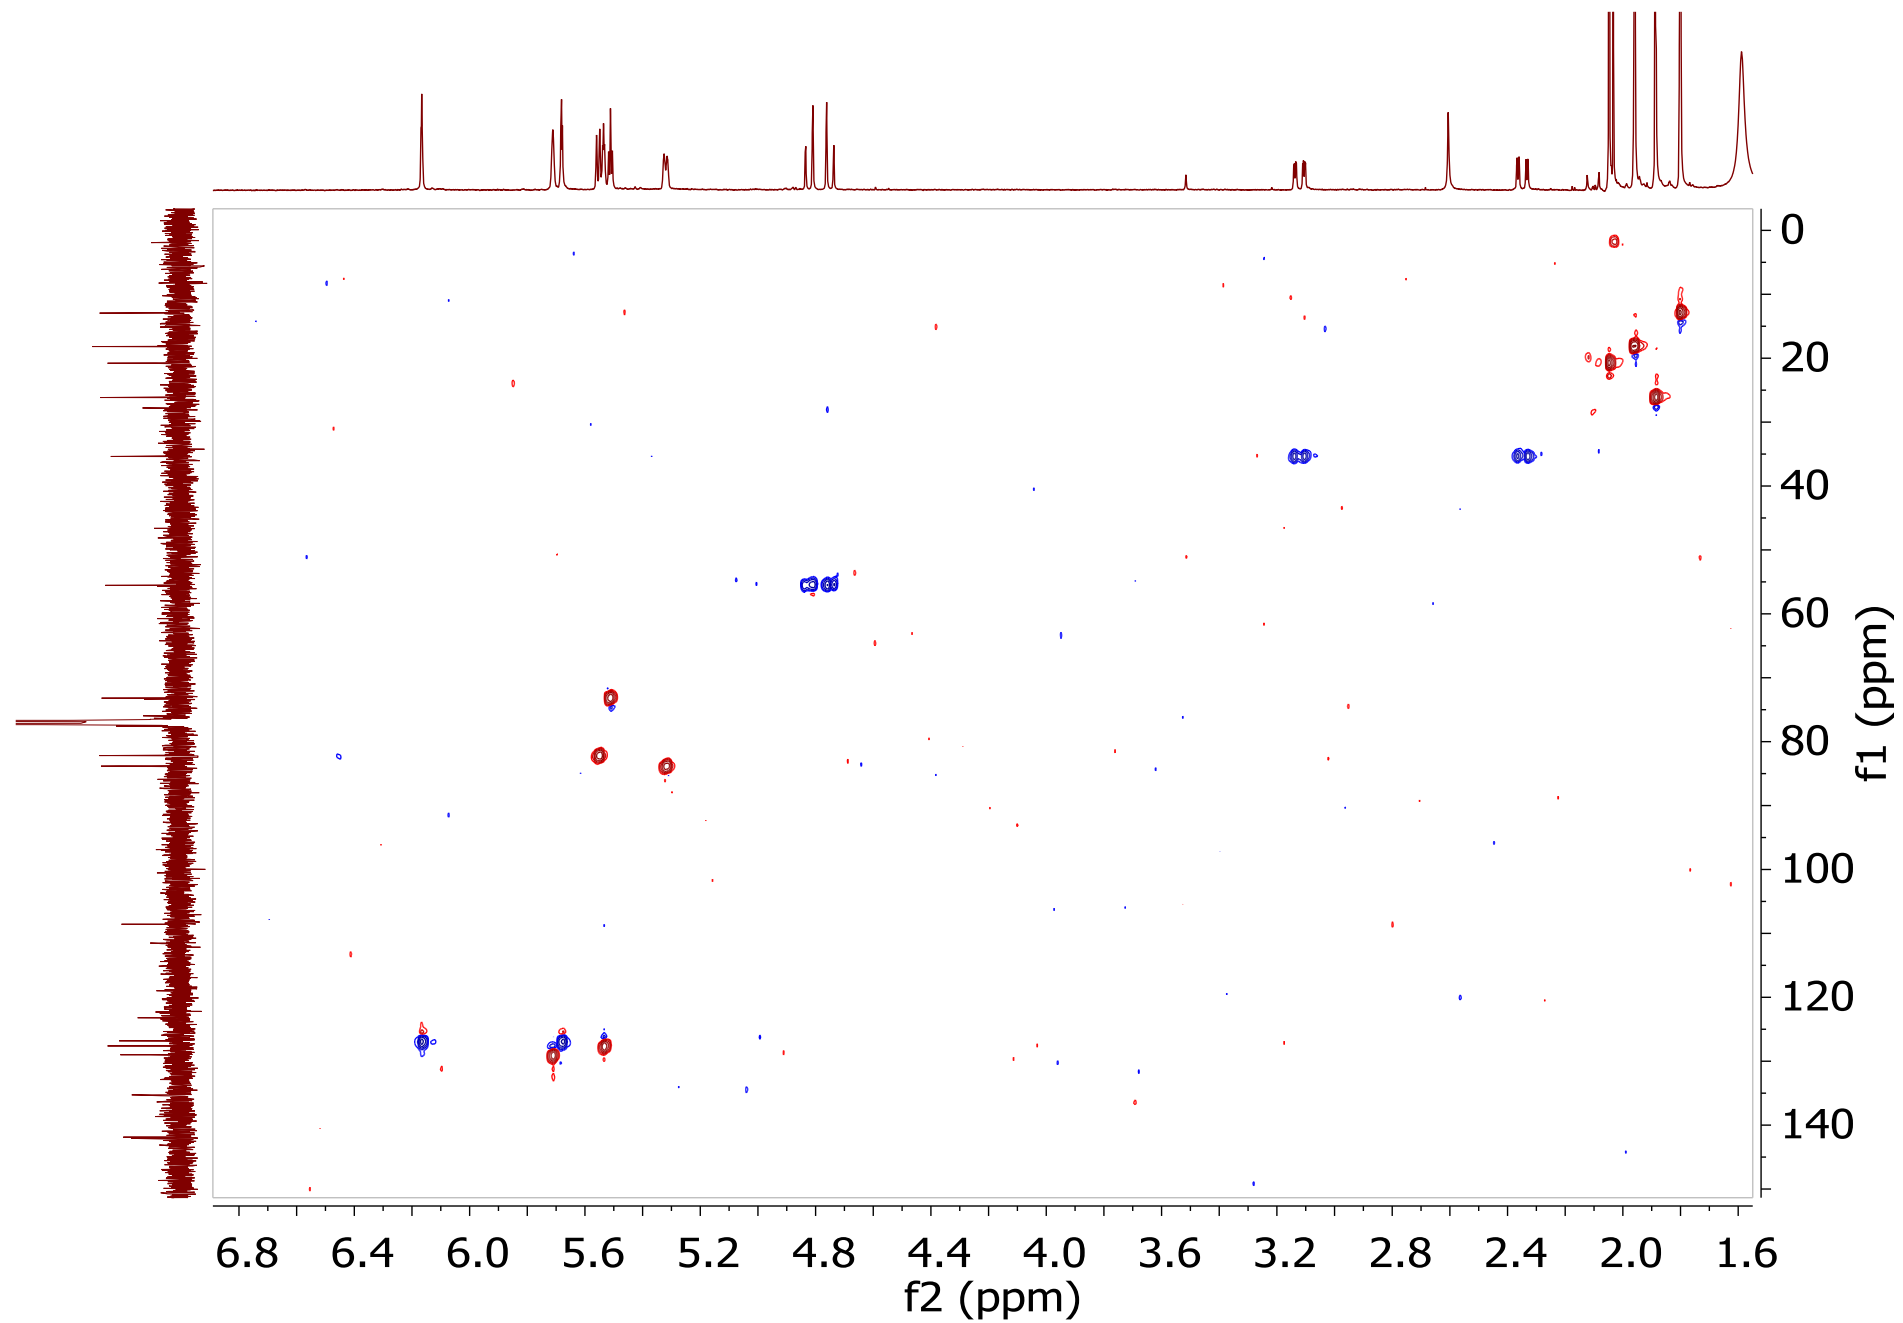

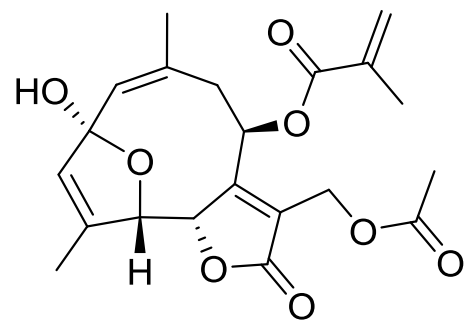

Compound 4 ( gHMBC, CDCl<sub>3</sub> )

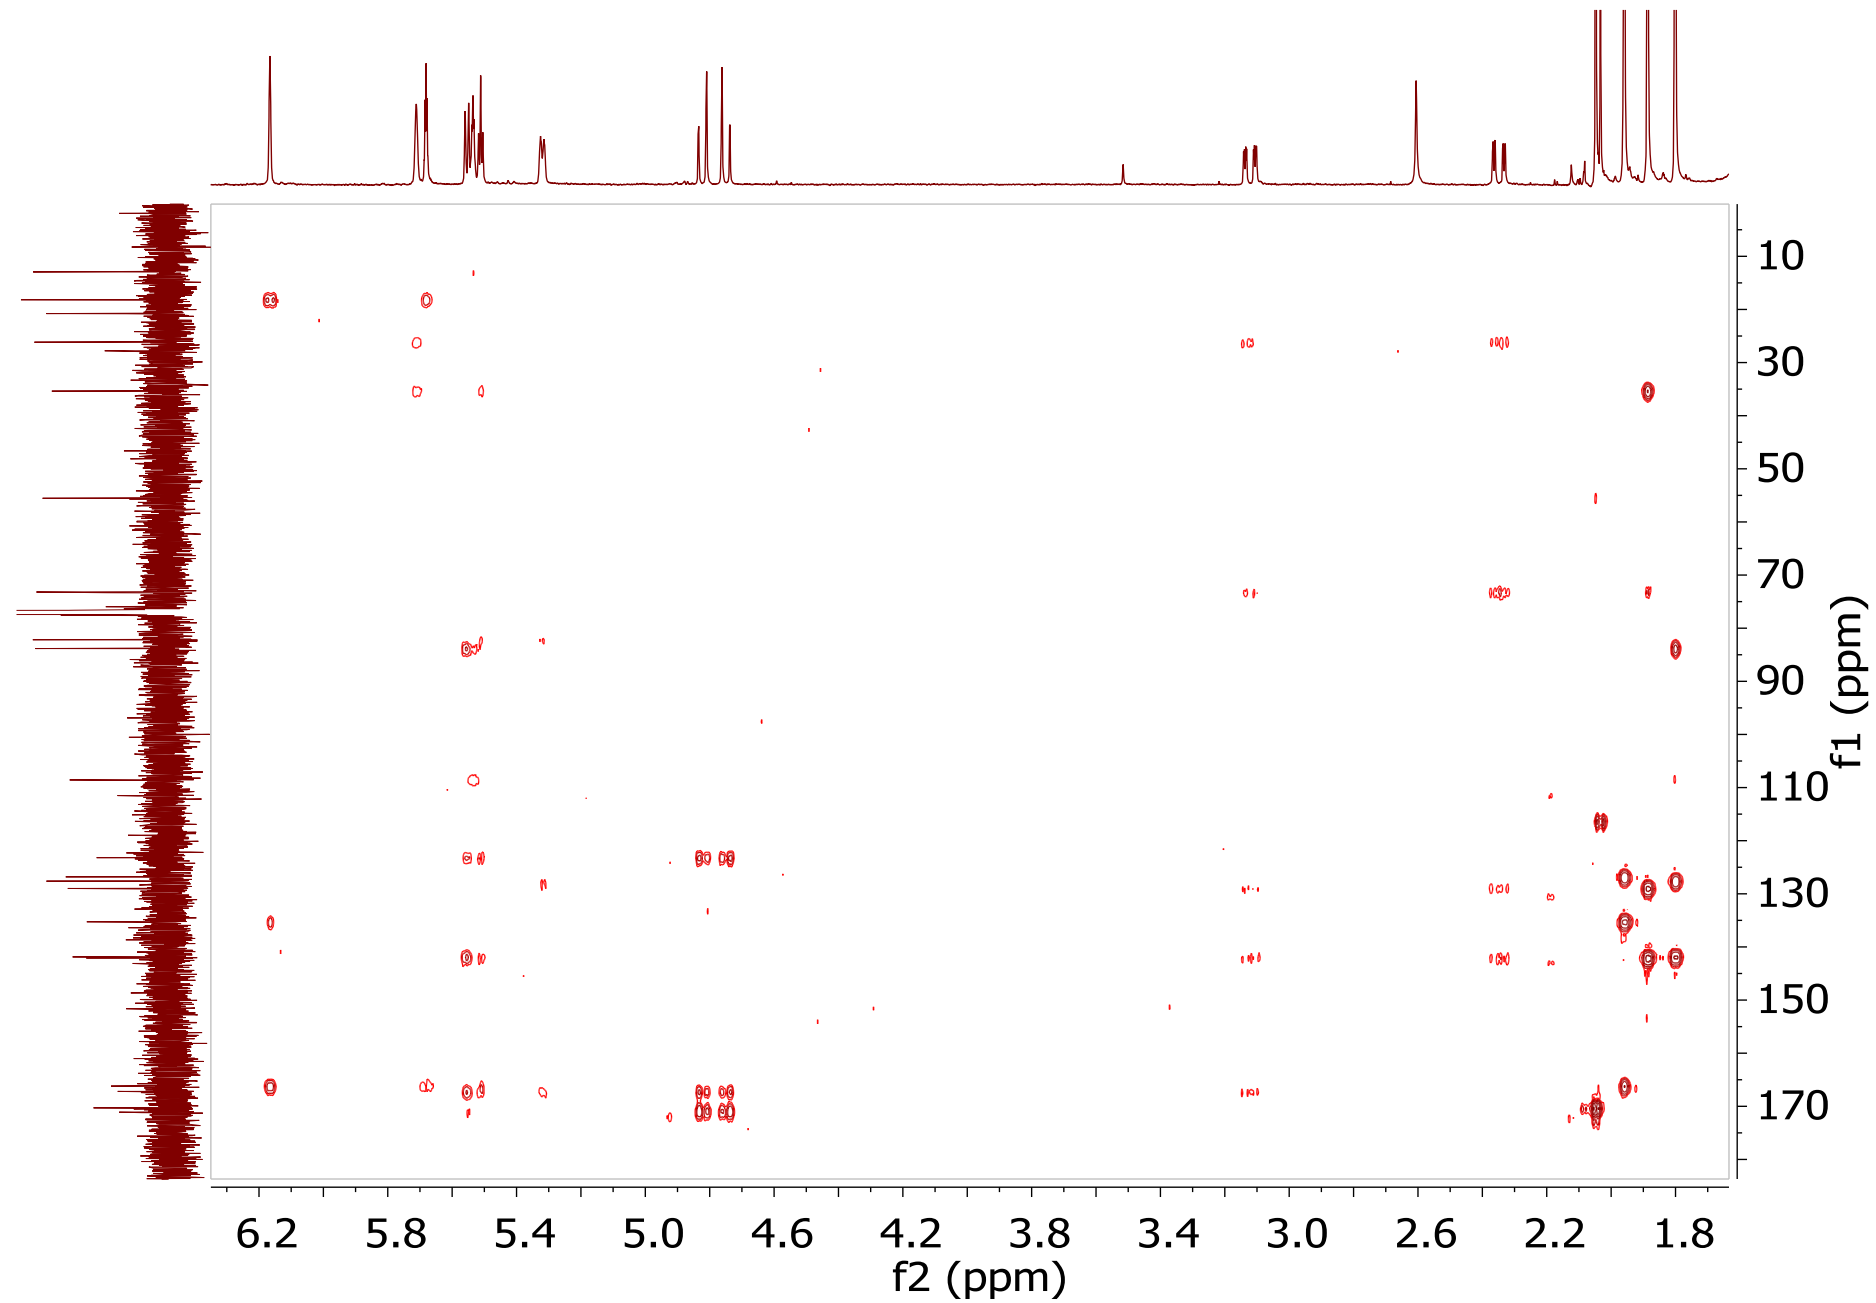

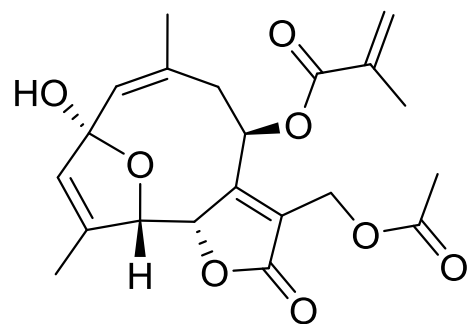

Compound 4 ( NOESY,  $\text{CDCl}_3$  )

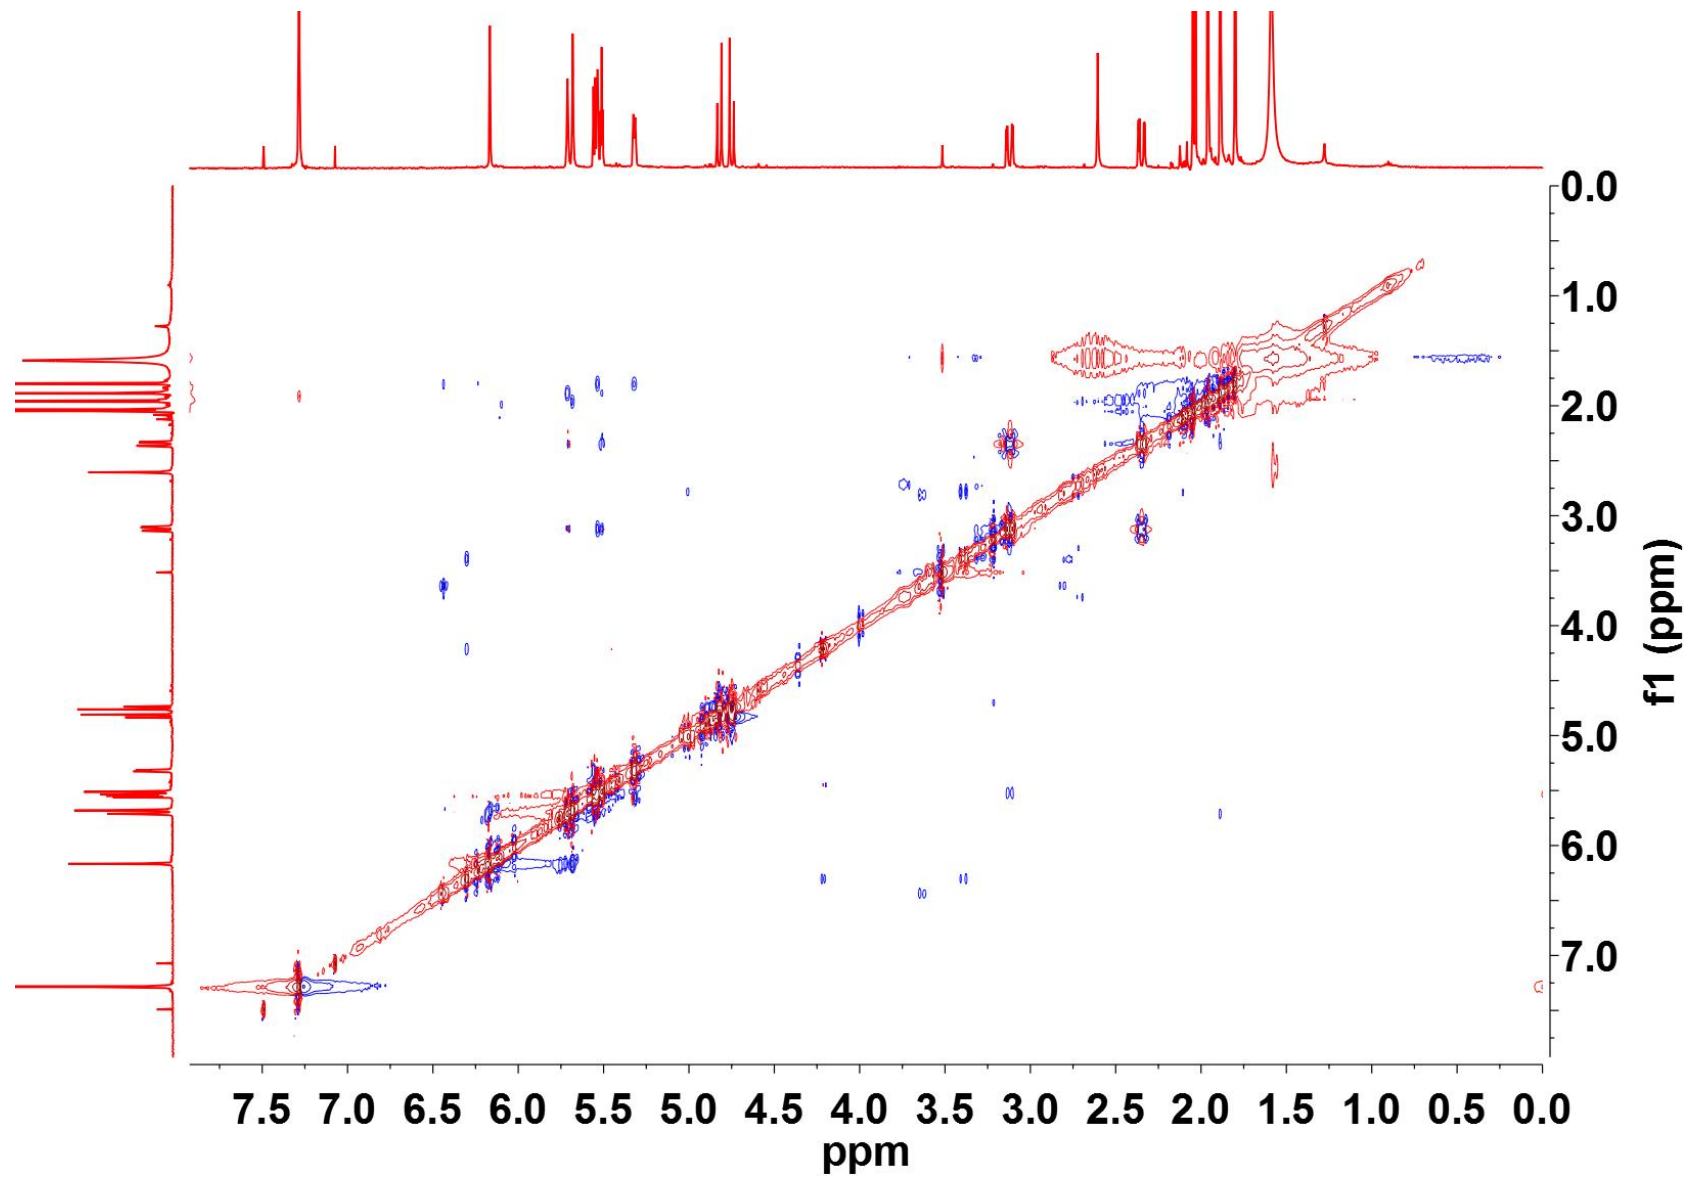

**Table S1** Relative Free Energies and Room Temperature Boltzmann Population for Conformers of Enantiomerically Unique Stereoisomers of Trichospirolide A (**1**)<sup>a</sup>

| Conf. # | R             |                |
|---------|---------------|----------------|
|         | $\Delta G^b$  | % <sup>c</sup> |
| 1       | <b>0.0000</b> | <b>23.36</b>   |
| 2       | <b>0.1268</b> | <b>18.86</b>   |
| 3       | <b>0.1537</b> | <b>18.02</b>   |
| 4       | <b>0.3991</b> | <b>11.91</b>   |
| 5       | <b>0.5359</b> | <b>9.46</b>    |
| 6       | <b>0.6306</b> | <b>8.06</b>    |
| 7       | <b>0.8013</b> | <b>6.04</b>    |
| 8       | <b>1.0059</b> | <b>4.28</b>    |
| 9       | 5.1242        | 0.00           |
| 10      | 5.1380        | 0.00           |
| 11      | 5.5271        | 0.00           |
| 12      | 5.5560        | 0.00           |
| 13      | 5.7241        | 0.00           |
| 14      | 5.9733        | 0.00           |
| 15      | 6.1006        | 0.00           |

<sup>a</sup> Conformers in bold were deemed significant and were selected for the computation of the UV and ECD spectra and optical rotations. <sup>b</sup> Relative Free energy in kcal mol<sup>-1</sup> calculated at the B3LYP/6-31G\* level of theory. <sup>c</sup> Room temperature Boltzmann population in %.

**Figure S1.** Comparison of Experimental (red) and calculated (blue) ECD Spectra for All Possible Stereoisomers of Trichospirolide A (**1**).

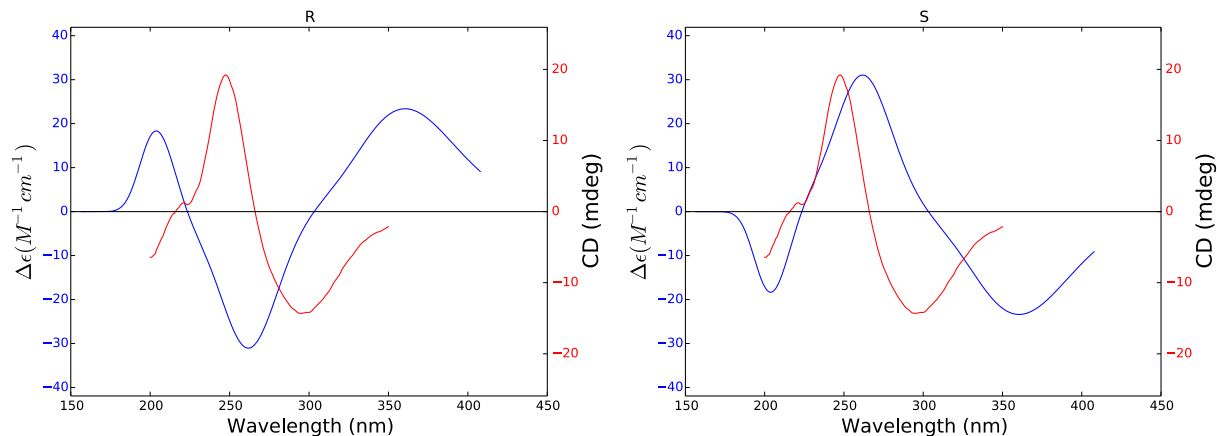

**Figure S2.** Comparison of Experimental (red) and calculated (blue) UV Spectra for Enantiomerically Unique Stereoisomers of Trichospirolide A (**1**)

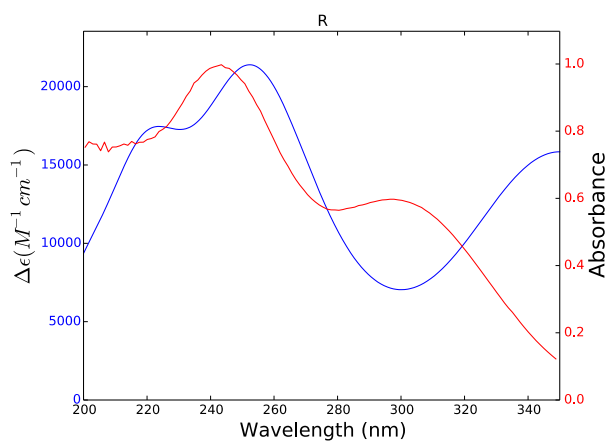

**Table S2.** Calculated Weighted Average Internuclear Distances for Enantiomerically Unique Stereoisomers of Trichospirolide A (**1**)

| Proton Pair | R<br>WA Distance<br>(Å) <sup>a</sup> | NOESY<br>Signal |
|-------------|--------------------------------------|-----------------|
| H5-H15      | 3.19                                 | medium          |
| H3-H9a      | 1.94                                 | strong          |
| H3-H8       | 2.65                                 | strong          |
| H1-H14      | 3.01                                 | medium          |
| H8-H15      | 3.85                                 | medium          |

<sup>a</sup> Weighted average internuclear distances are reported. In the case of methyl hydrogens, a simple average of the three individual weighted average distances is reported.

**Table S3.** Relative Free Energies and Room Temperature Boltzmann Population for Conformers of Enantiomerically Unique Stereoisomers of Trichospirolide B (**2**)<sup>a</sup>

| Conf. # | RRR           |                | RSR           |                | SRR           |                | SSR           |                |
|---------|---------------|----------------|---------------|----------------|---------------|----------------|---------------|----------------|
|         | $\Delta G^b$  | % <sup>c</sup> |
| 1       | <b>0.0000</b> | <b>25.90</b>   | <b>0.0000</b> | <b>23.81</b>   | <b>0.0000</b> | <b>82.94</b>   | <b>0.0000</b> | <b>45.72</b>   |
| 2       | <b>0.1381</b> | <b>20.52</b>   | <b>0.4644</b> | <b>10.87</b>   | <b>1.4232</b> | <b>7.51</b>    | <b>0.8566</b> | <b>10.77</b>   |
| 3       | <b>0.4255</b> | <b>12.63</b>   | <b>0.6783</b> | <b>7.58</b>    | <b>1.9798</b> | <b>2.93</b>    | <b>0.8911</b> | <b>10.16</b>   |
| 4       | <b>0.4656</b> | <b>11.80</b>   | <b>0.6783</b> | <b>7.58</b>    | <b>2.0300</b> | <b>2.70</b>    | <b>0.9024</b> | <b>9.97</b>    |
| 5       | <b>0.4913</b> | <b>11.30</b>   | <b>0.7034</b> | <b>7.26</b>    | 2.2427        | 1.88           | <b>1.0360</b> | <b>7.96</b>    |
| 6       | <b>0.8358</b> | <b>6.32</b>    | <b>0.7034</b> | <b>7.26</b>    | 2.6864        | 0.89           | <b>1.3015</b> | <b>5.08</b>    |
| 7       | <b>1.0197</b> | <b>4.63</b>    | <b>0.9814</b> | <b>4.54</b>    | 3.2273        | 0.36           | <b>1.7206</b> | <b>2.51</b>    |
| 8       | <b>1.3316</b> | <b>2.74</b>    | <b>0.9814</b> | <b>4.54</b>    | 3.3283        | 0.30           | 2.1825        | 1.15           |
| 9       | <b>1.3510</b> | <b>2.65</b>    | <b>1.2287</b> | <b>2.99</b>    | 3.5831        | 0.20           | 2.1862        | 1.14           |
| 10      | 1.9152        | 1.02           | <b>1.2293</b> | <b>2.99</b>    | 3.5981        | 0.19           | 2.2942        | 0.95           |
| 11      | 2.8200        | 0.22           | 1.5104        | 1.86           | 4.3744        | 0.05           | 2.2942        | 0.95           |
| 12      | 2.8326        | 0.22           | 1.5267        | 1.81           | 4.5074        | 0.04           | 2.3299        | 0.90           |
| 13      | 4.3656        | 0.02           | 1.5274        | 1.81           | 5.3138        | 0.01           | 2.4730        | 0.70           |
| 14      | 4.5250        | 0.01           | 1.5487        | 1.74           | 8.2743        | 0.00           | 2.7523        | 0.44           |
| 15      | 4.7251        | 0.01           | 1.5499        | 1.74           | 8.4883        | 0.00           | 2.9430        | 0.32           |
| 16      | 4.8638        | 0.01           | 1.6485        | 1.47           | 8.9169        | 0.00           | 3.3616        | 0.16           |
| 17      | 5.1437        | 0.00           | 1.6623        | 1.44           | 8.9527        | 0.00           | 3.4664        | 0.13           |
| 18      | 5.6758        | 0.00           | 1.7075        | 1.33           | 9.3041        | 0.00           | 3.4664        | 0.13           |
| 19      | 5.7649        | 0.00           | 1.7269        | 1.29           | 9.6800        | 0.00           | 3.5072        | 0.12           |
| 20      | 6.3146        | 0.00           | 1.7326        | 1.28           | 9.7760        | 0.00           | 3.7826        | 0.08           |
| 21      | 6.3328        | 0.00           | 1.9447        | 0.89           | 9.8287        | 0.00           | 3.7833        | 0.08           |
| 22      | 6.3799        | 0.00           | 1.9472        | 0.89           | 9.9711        | 0.00           | 3.8008        | 0.07           |
| 23      | 6.6083        | 0.00           | 2.1950        | 0.59           | 10.1663       | 0.00           | 3.8008        | 0.07           |
| 24      | 6.7545        | 0.00           | 2.2157        | 0.57           | 10.4989       | 0.00           | 3.8473        | 0.07           |
| 25      | 6.7551        | 0.00           | 2.4529        | 0.38           | 10.5089       | 0.00           | 3.9031        | 0.06           |
| 26      | 6.8097        | 0.00           | 2.6104        | 0.29           | 10.7285       | 0.00           | 3.9709        | 0.06           |
| 27      | 6.8505        | 0.00           | 2.6939        | 0.25           | 10.9551       | 0.00           | 4.0600        | 0.05           |
| 28      | 6.9453        | 0.00           | 2.6939        | 0.25           | 11.1879       | 0.00           | 4.0600        | 0.05           |
| 29      | 7.6054        | 0.00           | 2.8100        | 0.21           | 11.7878       | 0.00           | 4.1171        | 0.04           |
| 30      | 7.7422        | 0.00           | 3.0447        | 0.14           | 11.8304       | 0.00           | 4.1328        | 0.04           |
| 31      | 7.9656        | 0.00           | 3.0553        | 0.14           | 11.8712       | 0.00           | 4.2275        | 0.04           |
| 32      | 9.1761        | 0.00           | 3.2467        | 0.10           | 12.0061       | 0.00           | 4.9329        | 0.01           |
| 33      | 9.2520        | 0.00           | 3.3929        | 0.08           | 12.0752       | 0.00           | 5.1556        | 0.01           |
| 34      | 9.5306        | 0.00           | 4.1918        | 0.02           | 12.2879       | 0.00           | 14.2288       | 0.00           |
| 35      | 9.5883        | 0.00           | 12.8445       | 0.00           | 12.3161       | 0.00           | 14.5463       | 0.00           |
| 36      | 9.9448        | 0.00           | 13.5209       | 0.00           | 12.3168       | 0.00           | 19.5720       | 0.00           |
| 37      | 10.0558       | 0.00           | 13.7525       | 0.00           | 12.3563       | 0.00           | 19.9084       | 0.00           |
| 38      | 10.1267       | 0.00           | 14.0637       | 0.00           | 12.4586       | 0.00           |               |                |
| 39      | 10.3727       | 0.00           | 14.7741       | 0.00           | 12.4774       | 0.00           |               |                |
| 40      | 10.4681       | 0.00           | 16.9591       | 0.00           | 12.6437       | 0.00           |               |                |
| 41      | 10.6262       | 0.00           |               |                | 12.6556       | 0.00           |               |                |
| 42      | 10.8766       | 0.00           |               |                | 12.6644       | 0.00           |               |                |
| 43      | 11.8537       | 0.00           |               |                | 12.8777       | 0.00           |               |                |
| 44      | 11.9716       | 0.00           |               |                | 13.0196       | 0.00           |               |                |
| 45      | 12.2829       | 0.00           |               |                | 13.1162       | 0.00           |               |                |
| 46      | 12.4498       | 0.00           |               |                | 13.1840       | 0.00           |               |                |



| Conf. # | RRR          |                | RSR          |                | SRR          |                | SSR          |                |
|---------|--------------|----------------|--------------|----------------|--------------|----------------|--------------|----------------|
|         | $\Delta G^b$ | % <sup>c</sup> |
| 47      | 12.8137      | 0.00           |              |                | 13.2448      | 0.00           |              |                |
| 48      | 12.8539      | 0.00           |              |                | 13.3816      | 0.00           |              |                |
| 49      | 12.8916      | 0.00           |              |                | 13.5184      | 0.00           |              |                |
| 50      | 13.2041      | 0.00           |              |                | 13.6766      | 0.00           |              |                |
| 51      | 13.4312      | 0.00           |              |                | 14.7364      | 0.00           |              |                |
| 52      | 13.4620      | 0.00           |              |                | 14.7973      | 0.00           |              |                |
| 53      | 13.4726      | 0.00           |              |                | 14.8563      | 0.00           |              |                |
| 54      | 13.5498      | 0.00           |              |                | 15.0100      | 0.00           |              |                |
| 55      | 13.7801      | 0.00           |              |                | 15.2221      | 0.00           |              |                |
| 56      | 13.9489      | 0.00           |              |                | 15.3859      | 0.00           |              |                |
| 57      | 14.2212      | 0.00           |              |                | 15.6162      | 0.00           |              |                |
| 58      | 14.7898      | 0.00           |              |                | 15.7191      | 0.00           |              |                |
| 59      |              |                |              |                | 16.2192      | 0.00           |              |                |
| 60      |              |                |              |                | 16.3592      | 0.00           |              |                |

<sup>a</sup> Conformers in bold were deemed significant and were selected for the computation of the UV and ECD spectra and optical rotations. <sup>b</sup> Relative Free energy in kcal mol<sup>-1</sup> calculated at the B3LYP/6-31G\* level of theory. <sup>c</sup> Room temperature Boltzmann population in %.

**Figure S3.** Comparison of Experimental (red) and calculated (blue) ECD Spectra for All Possible Stereoisomers of Trichospirolide B (2)

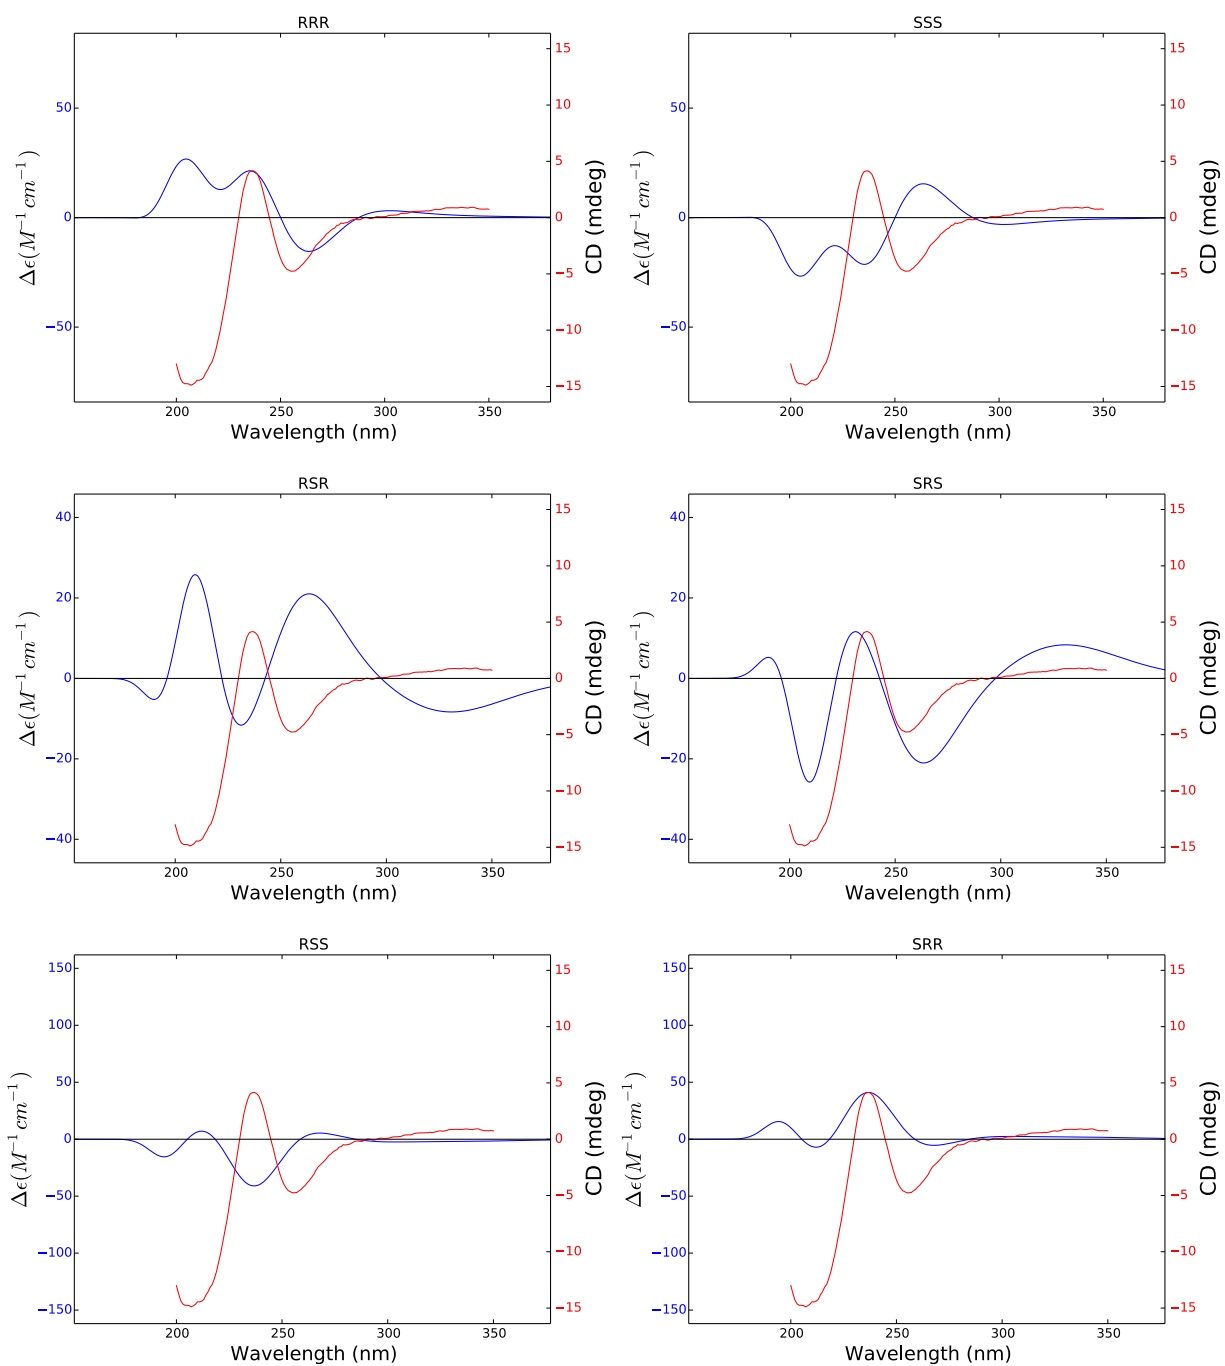

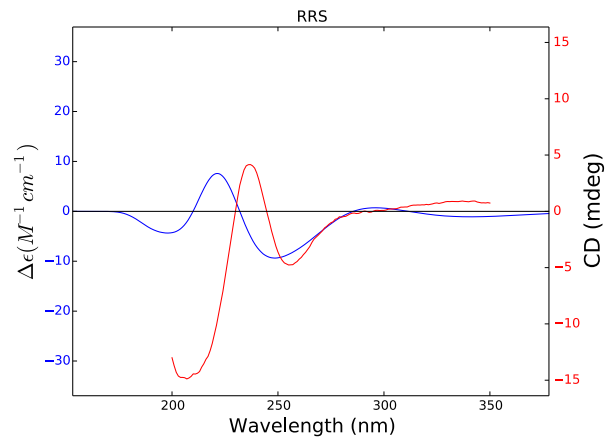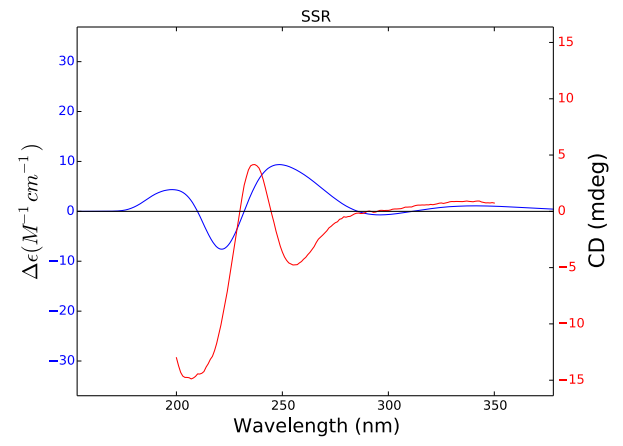

**Figure S4.** Comparison of Experimental (red) and calculated (blue) UV Spectra for Enantiomerically Unique Stereoisomers of Trichospirolide B (**2**)

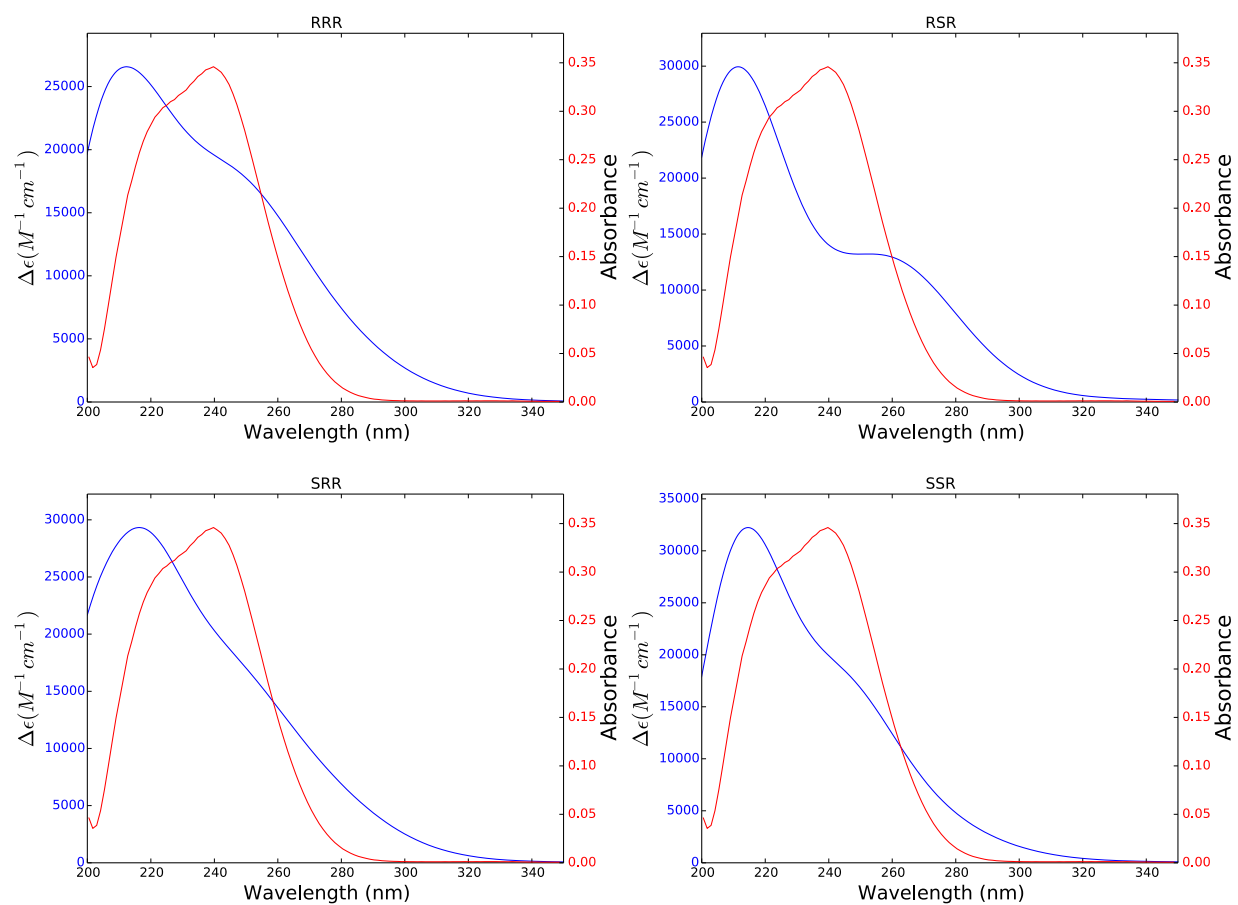

**Table S4.** Calculated Weighted Average Internuclear Distances for Enantiomerically Unique Stereoisomers of Trichospirolide B (**2**)

| Proton Pair | RRR<br>WA Distance<br>(Å) <sup>a</sup> | RSR<br>WA Distance<br>(Å) <sup>a</sup> | SRR<br>WA Distance<br>(Å) <sup>a</sup> | SSR<br>WA Distance<br>(Å) <sup>a</sup> | NOESY<br>Signal |
|-------------|----------------------------------------|----------------------------------------|----------------------------------------|----------------------------------------|-----------------|
| H3-H9a      | 1.99                                   | 3.00                                   | 1.98                                   | 2.16                                   | strong          |
| H3-H9b      | 3.68                                   | 4.18                                   | 3.67                                   | 3.86                                   | medium          |
| H3-H5       | 2.22                                   | 3.50                                   | 3.52                                   | 3.71                                   | strong          |
| H3-H8       | 3.21                                   | 2.09                                   | 3.17                                   | 3.26                                   | v. weak         |
| H1-H14      | 3.02                                   | 3.03                                   | 3.02                                   | 3.02                                   | medium          |
| H3'b-H4'    | 3.16                                   | 3.15                                   | 3.16                                   | 3.15                                   | medium          |
| H6-H15      | 3.23                                   | 3.35                                   | 3.13                                   | 4.72                                   | medium          |
| H6-H8       | 2.71                                   | 3.47                                   | 2.69                                   | 3.35                                   | medium          |
| H8-H15      | 3.44                                   | 4.69                                   | 3.35                                   | 3.01                                   | strong          |
| H5-H15      | 3.98                                   | 3.12                                   | 3.11                                   | 2.93                                   | weak            |

<sup>a</sup> Weighted average internuclear distances are reported. In the case of methyl hydrogens, a simple average of the three individual weighted average distances is reported.

**Table S5.** Relative Free Energies and Room Temperature Boltzmann Population for Conformers of Enantiomerically Unique Stereoisomers of Trichospirolide C (**3**)<sup>a</sup>

| Conf. # | RRRR          |                | RRSR          |                | RSRR          |                | RSSR          |                |
|---------|---------------|----------------|---------------|----------------|---------------|----------------|---------------|----------------|
|         | $\Delta G^b$  | % <sup>c</sup> |
| 1       | <b>0.0000</b> | <b>26.76</b>   | <b>0.0000</b> | <b>67.66</b>   | <b>0.0000</b> | <b>19.88</b>   | <b>0.0000</b> | <b>34.82</b>   |
| 2       | <b>0.5936</b> | <b>9.83</b>    | <b>0.6890</b> | <b>21.15</b>   | <b>0.1889</b> | <b>14.45</b>   | <b>0.1311</b> | <b>27.91</b>   |
| 3       | <b>0.5936</b> | <b>9.83</b>    | <b>1.5067</b> | <b>5.32</b>    | <b>0.3382</b> | <b>11.23</b>   | <b>0.7919</b> | <b>9.15</b>    |
| 4       | <b>0.8515</b> | <b>6.36</b>    | <b>1.9792</b> | <b>2.40</b>    | <b>0.4091</b> | <b>9.96</b>    | <b>0.8534</b> | <b>8.25</b>    |
| 5       | <b>0.8515</b> | <b>6.36</b>    | <b>1.9917</b> | <b>2.35</b>    | <b>0.4738</b> | <b>8.93</b>    | <b>1.1433</b> | <b>5.06</b>    |
| 6       | <b>0.8628</b> | <b>6.24</b>    | 2.9330        | 0.48           | <b>0.6783</b> | <b>6.33</b>    | <b>1.3002</b> | <b>3.88</b>    |
| 7       | <b>0.9664</b> | <b>5.24</b>    | 3.5831        | 0.16           | <b>0.8013</b> | <b>5.14</b>    | <b>1.5248</b> | <b>2.66</b>    |
| 8       | <b>1.0542</b> | <b>4.52</b>    | 3.8931        | 0.09           | <b>0.8026</b> | <b>5.13</b>    | 1.7081        | 1.95           |
| 9       | <b>1.0548</b> | <b>4.51</b>    | 4.0186        | 0.08           | <b>0.9105</b> | <b>4.27</b>    | 1.7338        | 1.87           |
| 10      | <b>1.0699</b> | <b>4.40</b>    | 4.1685        | 0.06           | <b>1.0272</b> | <b>3.51</b>    | 1.7489        | 1.82           |
| 11      | <b>1.2914</b> | <b>3.03</b>    | 4.3122        | 0.05           | <b>1.1860</b> | <b>2.69</b>    | 1.9265        | 1.35           |
| 12      | <b>1.3598</b> | <b>2.70</b>    | 4.3612        | 0.04           | 1.5481        | 1.46           | 2.4448        | 0.56           |
| 13      | <b>1.3598</b> | <b>2.70</b>    | 4.4547        | 0.04           | 1.6949        | 1.14           | 2.5753        | 0.45           |
| 14      | 1.6209        | 1.74           | 4.5074        | 0.03           | 1.7351        | 1.06           | 4.2376        | 0.03           |
| 15      | 2.0501        | 0.84           | 4.5294        | 0.03           | 1.7671        | 1.01           | 4.2545        | 0.03           |
| 16      | 2.0651        | 0.82           | 4.7063        | 0.02           | 2.1593        | 0.52           | 4.4277        | 0.02           |
| 17      | 2.0852        | 0.79           | 5.3702        | 0.01           | 2.1906        | 0.49           | 4.4428        | 0.02           |
| 18      | 2.1674        | 0.69           | 5.5164        | 0.01           | 2.2408        | 0.45           | 4.4716        | 0.02           |
| 19      | 2.2459        | 0.60           | 5.5735        | 0.01           | 2.2804        | 0.42           | 4.5683        | 0.02           |
| 20      | 2.6054        | 0.33           | 5.6746        | 0.00           | 2.4071        | 0.34           | 4.5996        | 0.01           |
| 21      | 2.6475        | 0.31           | 5.7756        | 0.00           | 2.5213        | 0.28           | 4.7565        | 0.01           |
| 22      | 2.6475        | 0.31           | 5.7825        | 0.00           | 2.5220        | 0.28           | 4.7841        | 0.01           |
| 23      | 2.7887        | 0.24           | 6.2927        | 0.00           | 2.6738        | 0.22           | 4.7848        | 0.01           |
| 24      | 2.8872        | 0.20           | 6.4759        | 0.00           | 2.8320        | 0.17           | 4.8801        | 0.01           |
| 25      | 2.8878        | 0.20           | 6.7489        | 0.00           | 3.0422        | 0.12           | 4.8971        | 0.01           |
| 26      | 2.9066        | 0.20           | 9.2175        | 0.00           | 3.1426        | 0.10           | 4.9391        | 0.01           |
| 27      | 2.9066        | 0.20           | 9.6850        | 0.00           | 3.1645        | 0.10           | 4.9642        | 0.01           |
| 28      | 3.6402        | 0.06           | 10.9369       | 0.00           | 3.3440        | 0.07           | 4.9674        | 0.01           |
| 29      | 4.4710        | 0.01           | 11.6284       | 0.00           | 3.3747        | 0.07           | 5.0182        | 0.01           |
| 30      | 4.8362        | 0.01           | 11.6365       | 0.00           | 3.4990        | 0.05           | 5.1048        | 0.01           |
| 31      | 5.2692        | 0.00           | 11.9729       | 0.00           | 3.5674        | 0.05           | 5.1155        | 0.01           |
| 32      | 5.5108        | 0.00           | 12.0545       | 0.00           | 3.7368        | 0.04           | 5.1744        | 0.01           |
| 33      | 6.6905        | 0.00           | 12.4002       | 0.00           | 3.7638        | 0.03           | 5.1882        | 0.01           |
| 34      | 7.2666        | 0.00           | 12.6167       | 0.00           | 4.9768        | 0.00           | 5.2253        | 0.01           |
| 35      | 7.4328        | 0.00           | 13.6446       | 0.00           | 5.1167        | 0.00           | 5.3520        | 0.00           |
| 36      | 7.4617        | 0.00           | 13.9577       | 0.00           | 5.1374        | 0.00           | 5.4349        | 0.00           |
| 37      | 7.4674        | 0.00           | 15.7599       | 0.00           | 5.8471        | 0.00           | 5.4424        | 0.00           |
| 38      | 7.5985        | 0.00           | 15.8791       | 0.00           | 5.9149        | 0.00           | 5.5742        | 0.00           |
| 39      | 7.6933        | 0.00           | 16.4100       | 0.00           | 5.9174        | 0.00           | 5.5905        | 0.00           |
| 40      | 7.7002        | 0.00           | 16.4351       | 0.00           | 6.5041        | 0.00           | 5.6112        | 0.00           |
| 41      | 7.7974        | 0.00           | 16.4853       | 0.00           | 6.8637        | 0.00           | 5.6382        | 0.00           |
| 42      | 8.0409        | 0.00           | 16.6936       | 0.00           | 6.9133        | 0.00           | 5.7135        | 0.00           |
| 43      | 8.0792        | 0.00           | 16.7125       | 0.00           | 6.9359        | 0.00           | 5.7957        | 0.00           |
| 44      | 8.7575        | 0.00           | 16.9139       | 0.00           | 7.1028        | 0.00           | 5.8164        | 0.00           |
| 45      | 8.9621        | 0.00           | 16.9290       | 0.00           | 7.1467        | 0.00           | 5.8421        | 0.00           |

| Conf. # | RRRR         |                | RRSR         |                | RSRR         |                | RSSR         |                |
|---------|--------------|----------------|--------------|----------------|--------------|----------------|--------------|----------------|
|         | $\Delta G^b$ | % <sup>c</sup> |
| 46      | 9.3336       | 0.00           | 16.9773      | 0.00           | 7.1837       | 0.00           | 5.8528       | 0.00           |
| 47      | 9.4773       | 0.00           | 17.0344      | 0.00           | 7.2000       | 0.00           | 5.8747       | 0.00           |
| 48      | 9.5344       | 0.00           | 17.0670      | 0.00           | 7.2170       | 0.00           | 5.9933       | 0.00           |
| 49      | 9.8544       | 0.00           | 18.2241      | 0.00           | 7.3676       | 0.00           | 6.0511       | 0.00           |
| 50      | 10.3294      | 0.00           | 18.2273      | 0.00           | 7.3858       | 0.00           | 6.1251       | 0.00           |
| 51      | 10.6865      | 0.00           | 18.5404      | 0.00           | 7.4203       | 0.00           | 6.1766       | 0.00           |
| 52      | 10.7285      | 0.00           | 18.5969      | 0.00           | 7.4398       | 0.00           | 6.3115       | 0.00           |
| 53      | 10.8760      | 0.00           | 18.6144      | 0.00           | 8.0949       | 0.00           | 6.5650       | 0.00           |
| 54      | 11.1358      | 0.00           | 18.8416      | 0.00           | 8.1997       | 0.00           | 6.6139       | 0.00           |
| 55      | 11.2324      | 0.00           | 18.8579      | 0.00           | 8.2499       | 0.00           | 6.7194       | 0.00           |
| 56      | 11.7859      | 0.00           | 18.9790      | 0.00           | 8.5605       | 0.00           | 6.7206       | 0.00           |
| 57      | 17.7817      | 0.00           | 19.1177      | 0.00           | 9.9128       | 0.00           | 6.7922       | 0.00           |
| 58      | 18.2988      | 0.00           | 19.1805      | 0.00           | 13.1714      | 0.00           | 6.8919       | 0.00           |
| 59      | 18.5197      | 0.00           | 19.3737      | 0.00           |              |                | 6.9020       | 0.00           |
| 60      | 19.0022      | 0.00           | 19.4691      | 0.00           |              |                | 6.9051       | 0.00           |
| 61      | 19.6185      | 0.00           | 19.5877      | 0.00           |              |                | 7.2132       | 0.00           |
| 62      | 20.0213      | 0.00           | 20.0878      | 0.00           |              |                | 7.3638       | 0.00           |
| 63      | 20.1255      | 0.00           | 20.4524      | 0.00           |              |                | 7.7021       | 0.00           |
| 64      | 20.8019      | 0.00           | 20.5516      | 0.00           |              |                | 7.8037       | 0.00           |
| 65      |              |                | 23.1375      | 0.00           |              |                | 7.8357       | 0.00           |
| 66      |              |                | 23.2850      | 0.00           |              |                | 7.9236       | 0.00           |
| 67      |              |                | 23.5002      | 0.00           |              |                | 7.9280       | 0.00           |
| 68      |              |                | 23.9941      | 0.00           |              |                | 7.9744       | 0.00           |
| 69      |              |                | 24.1033      | 0.00           |              |                | 8.1520       | 0.00           |
| 70      |              |                | 24.1227      | 0.00           |              |                | 8.3848       | 0.00           |
| 71      |              |                | 24.1648      | 0.00           |              |                | 8.7688       | 0.00           |
| 72      |              |                | 24.1654      | 0.00           |              |                | 8.8504       | 0.00           |
| 73      |              |                | 24.2288      | 0.00           |              |                | 11.4326      | 0.00           |
| 74      |              |                | 24.2683      | 0.00           |              |                | 14.1918      | 0.00           |
| 75      |              |                | 24.3060      | 0.00           |              |                |              |                |
| 76      |              |                | 24.8770      | 0.00           |              |                |              |                |
| 77      |              |                | 24.8895      | 0.00           |              |                |              |                |
| 78      |              |                | 25.0621      | 0.00           |              |                |              |                |
| 79      |              |                | 25.0803      | 0.00           |              |                |              |                |
| 80      |              |                | 25.0822      | 0.00           |              |                |              |                |
| 81      |              |                | 25.4832      | 0.00           |              |                |              |                |
| 82      |              |                | 25.6168      | 0.00           |              |                |              |                |

<sup>a</sup> Conformers in bold were deemed significant and were selected for the computation of the UV and ECD spectra and optical rotations. <sup>b</sup> Relative Free energy in kcal mol<sup>-1</sup> calculated at the B3LYP/6-31G\* level of theory. <sup>c</sup> Room temperature Boltzmann population in %.

**Table S6.** Relative Free Energies and Room Temperature Boltzmann Population for Conformers of Enantiomerically Unique Stereoisomers of Trichospirolide C (**3**)<sup>a</sup>

| Conf. # | SRRR          |                | SRSR          |                | SSRR          |                | SSSR          |                |
|---------|---------------|----------------|---------------|----------------|---------------|----------------|---------------|----------------|
|         | $\Delta G^b$  | % <sup>c</sup> |
| 1       | <b>0.0000</b> | <b>14.35</b>   | <b>0.0000</b> | <b>32.32</b>   | <b>0.0000</b> | <b>26.70</b>   | <b>0.0000</b> | <b>27.45</b>   |
| 2       | <b>0.0195</b> | <b>13.89</b>   | <b>0.0289</b> | <b>30.78</b>   | <b>0.2039</b> | <b>18.93</b>   | <b>0.2698</b> | <b>17.41</b>   |
| 3       | <b>0.5522</b> | <b>5.65</b>    | <b>0.5453</b> | <b>12.87</b>   | <b>0.3257</b> | <b>15.41</b>   | <b>0.3533</b> | <b>15.12</b>   |
| 4       | <b>0.6049</b> | <b>5.17</b>    | <b>0.7932</b> | <b>8.47</b>    | <b>0.6551</b> | <b>8.84</b>    | <b>0.7919</b> | <b>7.21</b>    |
| 5       | <b>0.7016</b> | <b>4.39</b>    | <b>1.1176</b> | <b>4.90</b>    | <b>0.7700</b> | <b>7.28</b>    | <b>1.0624</b> | <b>4.57</b>    |
| 6       | <b>0.7179</b> | <b>4.27</b>    | <b>1.6114</b> | <b>2.13</b>    | <b>0.8848</b> | <b>6.00</b>    | <b>1.1992</b> | <b>3.63</b>    |
| 7       | <b>0.7455</b> | <b>4.08</b>    | 1.6943        | 1.85           | <b>1.0875</b> | <b>4.26</b>    | <b>1.2732</b> | <b>3.20</b>    |
| 8       | <b>0.7593</b> | <b>3.99</b>    | 1.9447        | 1.21           | <b>1.1370</b> | <b>3.92</b>    | <b>1.3071</b> | <b>3.02</b>    |
| 9       | <b>0.7882</b> | <b>3.80</b>    | 1.9647        | 1.17           | 1.5600        | 1.92           | <b>1.3906</b> | <b>2.63</b>    |
| 10      | <b>0.8082</b> | <b>3.67</b>    | 2.4925        | 0.48           | 1.5669        | 1.90           | 1.6146        | 1.80           |
| 11      | <b>0.8327</b> | <b>3.52</b>    | 2.5232        | 0.46           | 2.0745        | 0.81           | 1.7206        | 1.50           |
| 12      | <b>0.9111</b> | <b>3.08</b>    | 2.5803        | 0.42           | 2.0877        | 0.79           | 1.7539        | 1.42           |
| 13      | <b>0.9720</b> | <b>2.78</b>    | 2.6004        | 0.40           | 2.1342        | 0.73           | 1.9848        | 0.96           |
| 14      | <b>1.0680</b> | <b>2.37</b>    | 2.8332        | 0.27           | 2.2145        | 0.64           | 2.0783        | 0.82           |
| 15      | <b>1.0831</b> | <b>2.31</b>    | 2.8752        | 0.25           | 2.6136        | 0.32           | 2.1505        | 0.73           |
| 16      | 1.1841        | 1.95           | 3.0403        | 0.19           | 2.6663        | 0.30           | 2.1605        | 0.72           |
| 17      | 1.3473        | 1.48           | 3.1168        | 0.17           | 2.7372        | 0.26           | 2.1630        | 0.71           |
| 18      | 1.3642        | 1.44           | 3.2147        | 0.14           | 3.0008        | 0.17           | 2.1712        | 0.70           |
| 19      | 1.3811        | 1.40           | 3.3045        | 0.12           | 3.0729        | 0.15           | 2.2396        | 0.63           |
| 20      | 1.4703        | 1.20           | 3.3114        | 0.12           | 3.1457        | 0.13           | 2.2935        | 0.57           |
| 21      | 1.4847        | 1.17           | 3.3189        | 0.12           | 3.2919        | 0.10           | 2.3168        | 0.55           |
| 22      | 1.5299        | 1.09           | 3.3202        | 0.12           | 3.2988        | 0.10           | 2.3475        | 0.52           |
| 23      | 1.5405        | 1.07           | 3.4162        | 0.10           | 3.3559        | 0.09           | 2.5201        | 0.39           |
| 24      | 1.6171        | 0.94           | 3.4438        | 0.10           | 3.6383        | 0.06           | 2.5339        | 0.38           |
| 25      | 1.7495        | 0.75           | 3.4745        | 0.09           | 3.8215        | 0.04           | 2.5753        | 0.36           |
| 26      | 1.8348        | 0.65           | 3.5649        | 0.08           | 3.9125        | 0.04           | 2.6493        | 0.31           |
| 27      | 1.8367        | 0.65           | 3.6101        | 0.07           | 4.1391        | 0.02           | 2.7636        | 0.26           |
| 28      | 1.9064        | 0.57           | 3.6163        | 0.07           | 4.1673        | 0.02           | 2.7686        | 0.26           |
| 29      | 1.9183        | 0.56           | 3.7067        | 0.06           | 4.2727        | 0.02           | 2.7692        | 0.26           |
| 30      | 1.9559        | 0.53           | 3.7851        | 0.05           | 4.7226        | 0.01           | 2.8062        | 0.24           |
| 31      | 1.9823        | 0.51           | 3.7971        | 0.05           | 4.7433        | 0.01           | 2.8752        | 0.21           |
| 32      | 1.9848        | 0.50           | 3.8686        | 0.05           | 4.7647        | 0.01           | 2.9750        | 0.18           |
| 33      | 2.0080        | 0.48           | 3.9577        | 0.04           | 4.8858        | 0.01           | 2.9819        | 0.18           |
| 34      | 2.0269        | 0.47           | 4.1428        | 0.03           | 5.0383        | 0.01           | 3.0240        | 0.17           |
| 35      | 2.0733        | 0.43           | 4.1434        | 0.03           | 5.1230        | 0.00           | 3.1482        | 0.14           |
| 36      | 2.1197        | 0.40           | 4.1623        | 0.03           | 5.2328        | 0.00           | 3.2078        | 0.12           |
| 37      | 2.1260        | 0.40           | 4.2231        | 0.03           | 5.3163        | 0.00           | 3.2662        | 0.11           |
| 38      | 2.1693        | 0.37           | 4.3009        | 0.02           | 5.3301        | 0.00           | 3.3540        | 0.10           |
| 39      | 2.1919        | 0.36           | 4.3072        | 0.02           | 5.4236        | 0.00           | 3.5699        | 0.07           |
| 40      | 2.1988        | 0.35           | 4.4798        | 0.02           | 5.6049        | 0.00           | 3.6709        | 0.06           |
| 41      | 2.2710        | 0.31           | 4.5143        | 0.02           | 5.6388        | 0.00           | 3.7989        | 0.05           |
| 42      | 2.3274        | 0.28           | 4.6053        | 0.01           | 6.4891        | 0.00           | 3.8755        | 0.04           |
| 43      | 2.3362        | 0.28           | 4.6260        | 0.01           | 7.0814        | 0.00           | 3.9006        | 0.04           |
| 44      | 2.4542        | 0.23           | 4.6561        | 0.01           | 7.1185        | 0.00           | 4.0148        | 0.03           |
| 45      | 2.5163        | 0.21           | 4.8306        | 0.01           | 7.1706        | 0.00           | 4.1491        | 0.02           |
| 46      | 2.5477        | 0.19           | 5.0471        | 0.01           | 7.5665        | 0.00           | 4.3016        | 0.02           |



| Conf. # | SRRR         |                | SRSR         |                | SSRR         |                | SSSR         |                |
|---------|--------------|----------------|--------------|----------------|--------------|----------------|--------------|----------------|
|         | $\Delta G^b$ | % <sup>c</sup> |
| 47      | 2.5998       | 0.18           | 5.5811       | 0.00           | 9.1541       | 0.00           | 4.3179       | 0.02           |
| 48      | 2.7604       | 0.14           | 5.9093       | 0.00           | 9.3555       | 0.00           | 4.3298       | 0.02           |
| 49      | 2.7930       | 0.13           | 6.0417       | 0.00           |              |                | 4.3675       | 0.02           |
| 50      | 2.8200       | 0.12           | 6.5016       | 0.00           |              |                | 4.6524       | 0.01           |
| 51      | 2.8282       | 0.12           | 6.5895       | 0.00           |              |                | 4.6655       | 0.01           |
| 52      | 2.8495       | 0.12           | 7.2785       | 0.00           |              |                | 4.6662       | 0.01           |
| 53      | 2.9744       | 0.09           | 7.6958       | 0.00           |              |                | 4.8174       | 0.01           |
| 54      | 2.9957       | 0.09           | 9.7634       | 0.00           |              |                | 4.9467       | 0.01           |
| 55      | 3.0403       | 0.08           | 10.7417      | 0.00           |              |                | 4.9542       | 0.01           |
| 56      | 3.1244       | 0.07           |              |                |              |                | 5.0627       | 0.01           |
| 57      | 3.1369       | 0.07           |              |                |              |                | 5.0734       | 0.01           |
| 58      | 3.1608       | 0.07           |              |                |              |                | 5.1625       | 0.00           |
| 59      | 3.4563       | 0.04           |              |                |              |                | 5.1744       | 0.00           |
| 60      | 3.6264       | 0.03           |              |                |              |                | 5.2297       | 0.00           |
| 61      | 3.7851       | 0.02           |              |                |              |                | 5.3200       | 0.00           |
| 62      | 3.8316       | 0.02           |              |                |              |                | 5.4267       | 0.00           |
| 63      | 3.9113       | 0.02           |              |                |              |                | 5.4367       | 0.00           |
| 64      | 4.0217       | 0.02           |              |                |              |                | 5.4838       | 0.00           |
| 65      | 4.0349       | 0.02           |              |                |              |                | 5.5177       | 0.00           |
| 66      | 4.2790       | 0.01           |              |                |              |                | 5.6237       | 0.00           |
| 67      | 4.9096       | 0.00           |              |                |              |                | 5.6997       | 0.00           |
| 68      | 5.1675       | 0.00           |              |                |              |                | 5.7172       | 0.00           |
| 69      | 5.2730       | 0.00           |              |                |              |                | 5.7210       | 0.00           |
| 70      | 6.4815       | 0.00           |              |                |              |                | 5.9745       | 0.00           |
| 71      | 8.4959       | 0.00           |              |                |              |                | 6.3353       | 0.00           |
| 72      | 8.5536       | 0.00           |              |                |              |                | 6.4094       | 0.00           |
| 73      |              |                |              |                |              |                | 6.6836       | 0.00           |
| 74      |              |                |              |                |              |                | 7.0143       | 0.00           |
| 75      |              |                |              |                |              |                | 7.0846       | 0.00           |
| 76      |              |                |              |                |              |                | 7.4404       | 0.00           |
| 77      |              |                |              |                |              |                | 7.5640       | 0.00           |
| 78      |              |                |              |                |              |                | 7.7322       | 0.00           |
| 79      |              |                |              |                |              |                | 7.7654       | 0.00           |
| 80      |              |                |              |                |              |                | 8.1896       | 0.00           |
| 81      |              |                |              |                |              |                | 8.4444       | 0.00           |
| 82      |              |                |              |                |              |                | 8.7280       | 0.00           |
| 83      |              |                |              |                |              |                | 9.1259       | 0.00           |
| 84      |              |                |              |                |              |                | 9.2966       | 0.00           |
| 85      |              |                |              |                |              |                | 9.4214       | 0.00           |
| 86      |              |                |              |                |              |                | 12.0940      | 0.00           |
| 87      |              |                |              |                |              |                | 13.7519      | 0.00           |
| 88      |              |                |              |                |              |                | 13.9602      | 0.00           |
| 89      |              |                |              |                |              |                | 14.9818      | 0.00           |
| 90      |              |                |              |                |              |                | 15.1958      | 0.00           |

<sup>a</sup> Conformers in bold were deemed significant and were selected for the computation of the UV and ECD spectra and optical rotations. <sup>b</sup> Relative Free energy in kcal mol<sup>-1</sup> calculated at the B3LYP/6-31G\* level of theory. <sup>c</sup> Room temperature Boltzmann population in %.

**Figure S5.** Comparison of Experimental (red) and calculated (blue) ECD Spectra for All Possible Stereoisomers of Trichospirolide C (**3**)

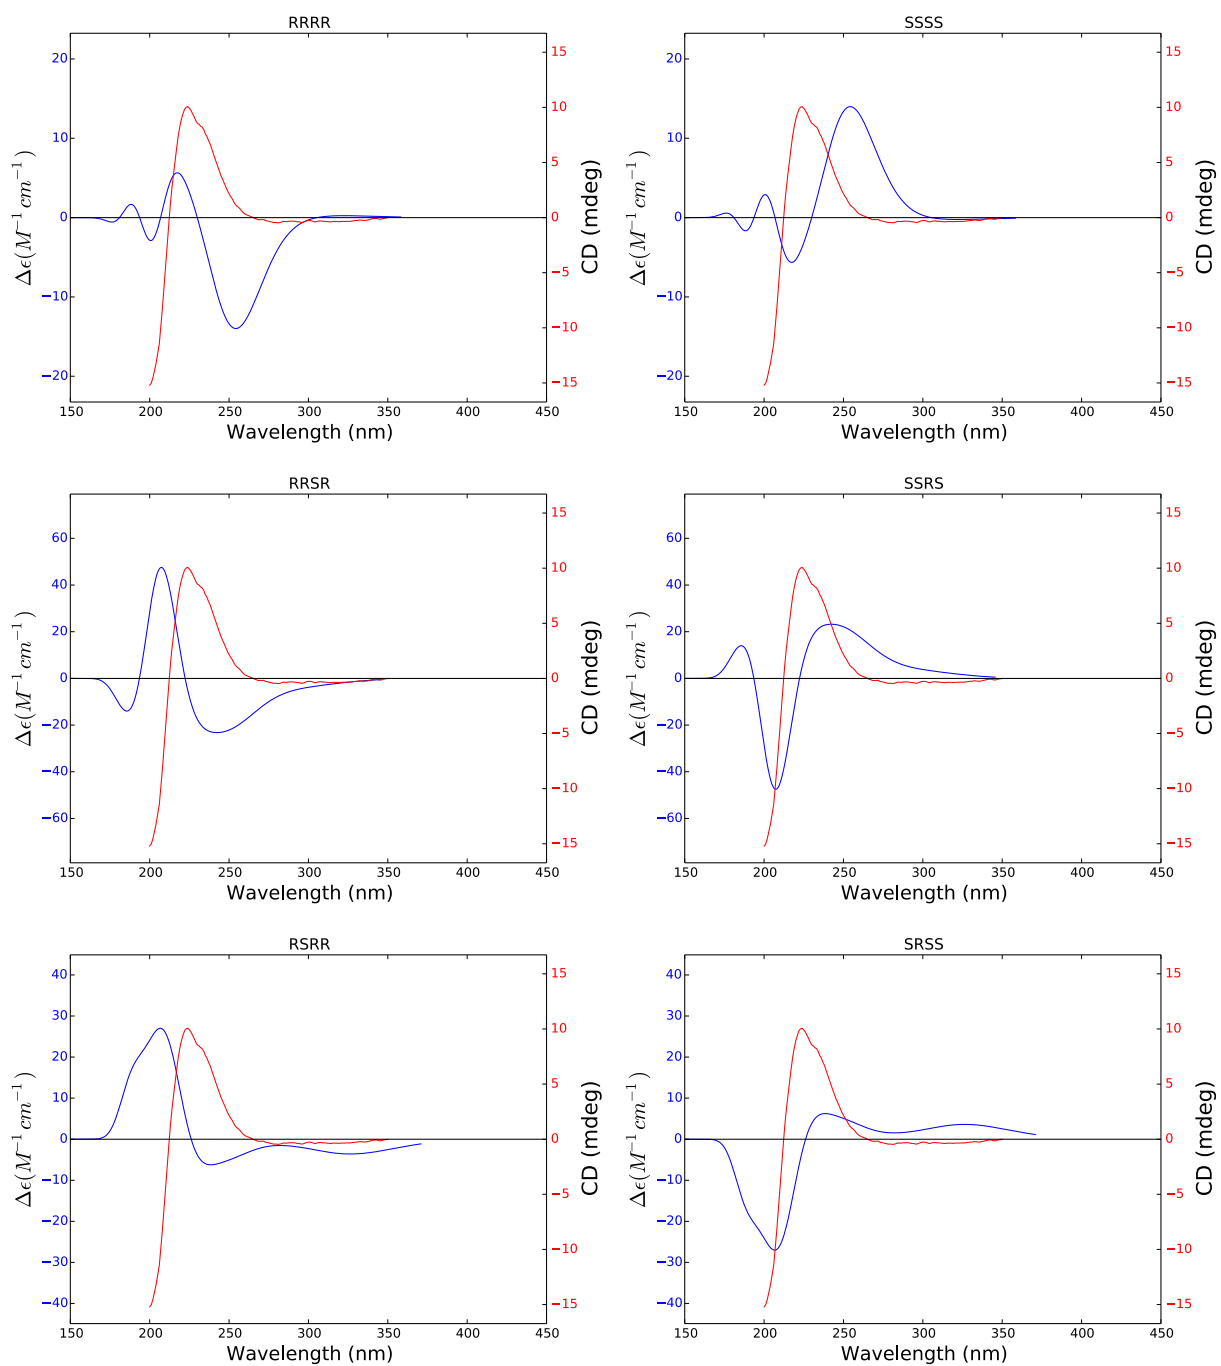

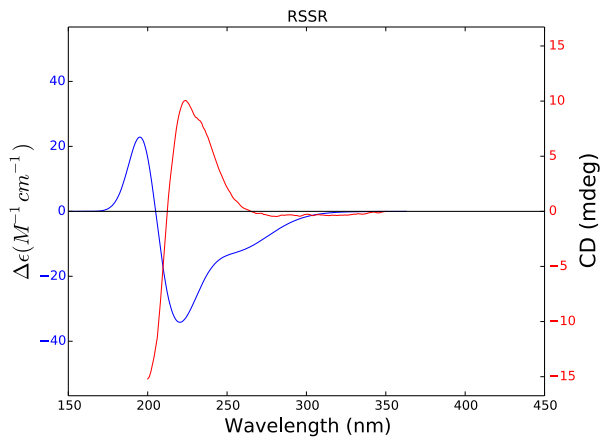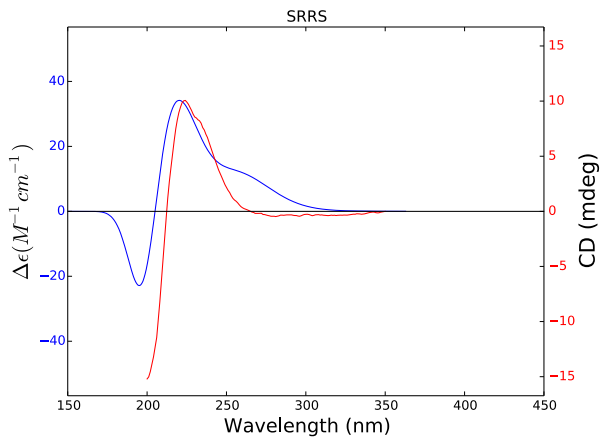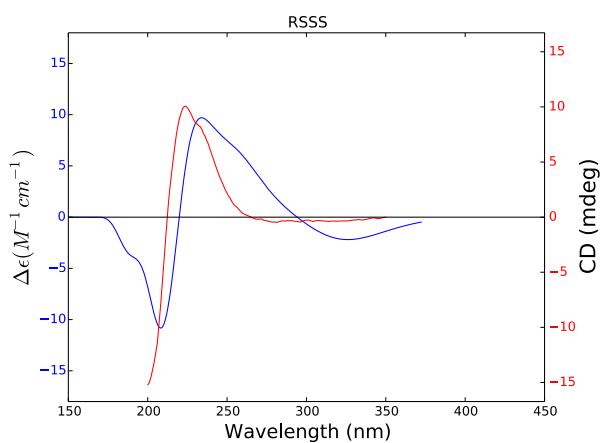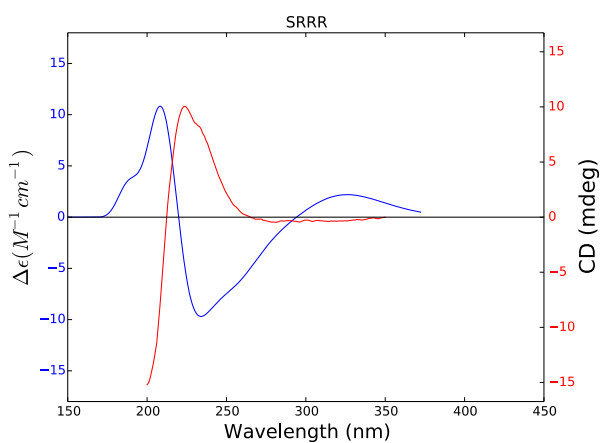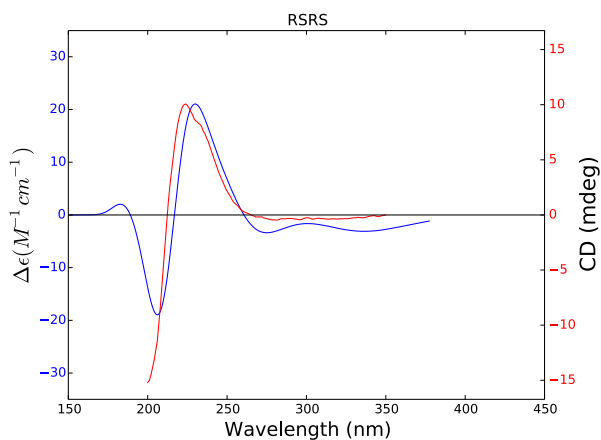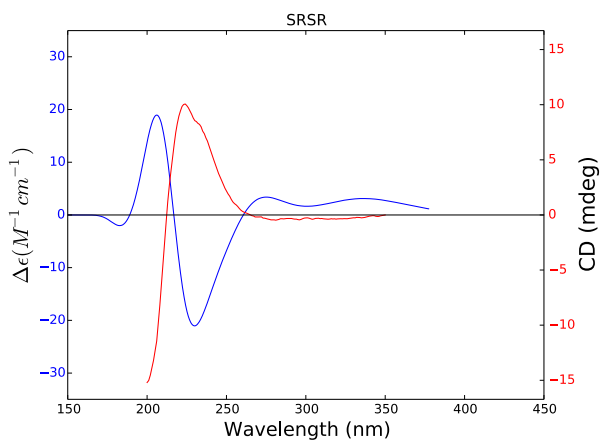

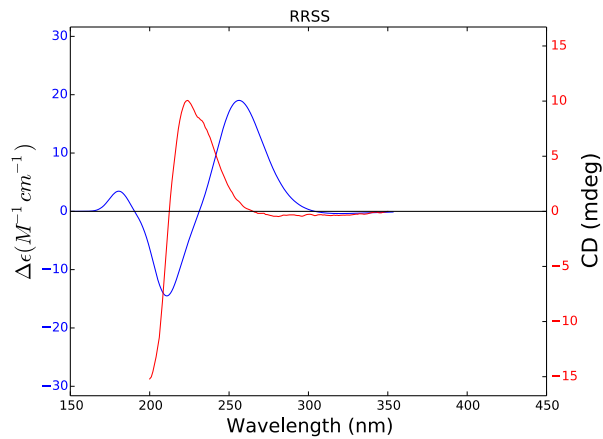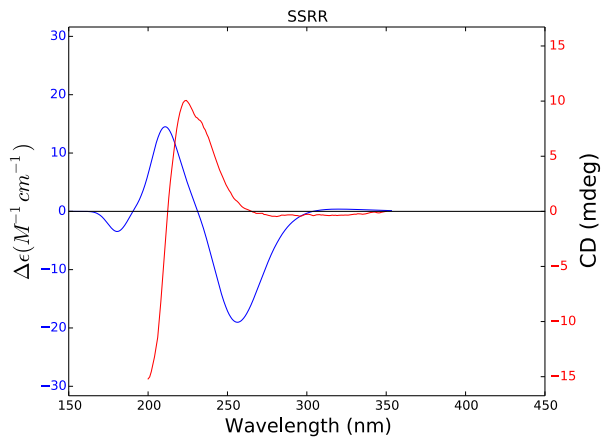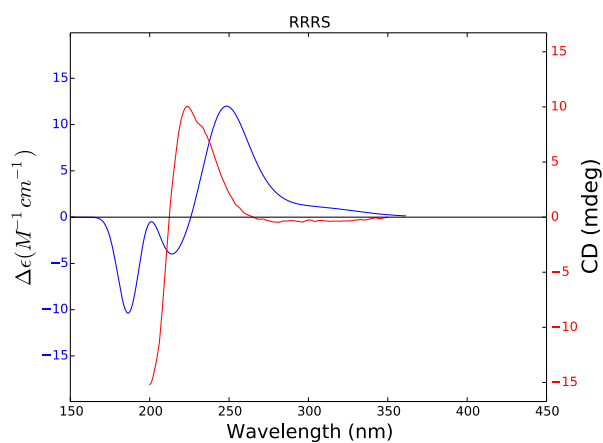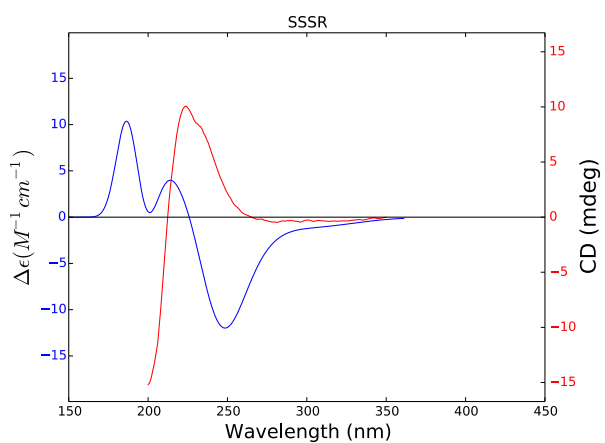

**Figure S6.** Comparison of Experimental (red) and calculated (blue) UV Spectra for Enantiomerically Unique Stereoisomers of Trichospirolide C (**3**)

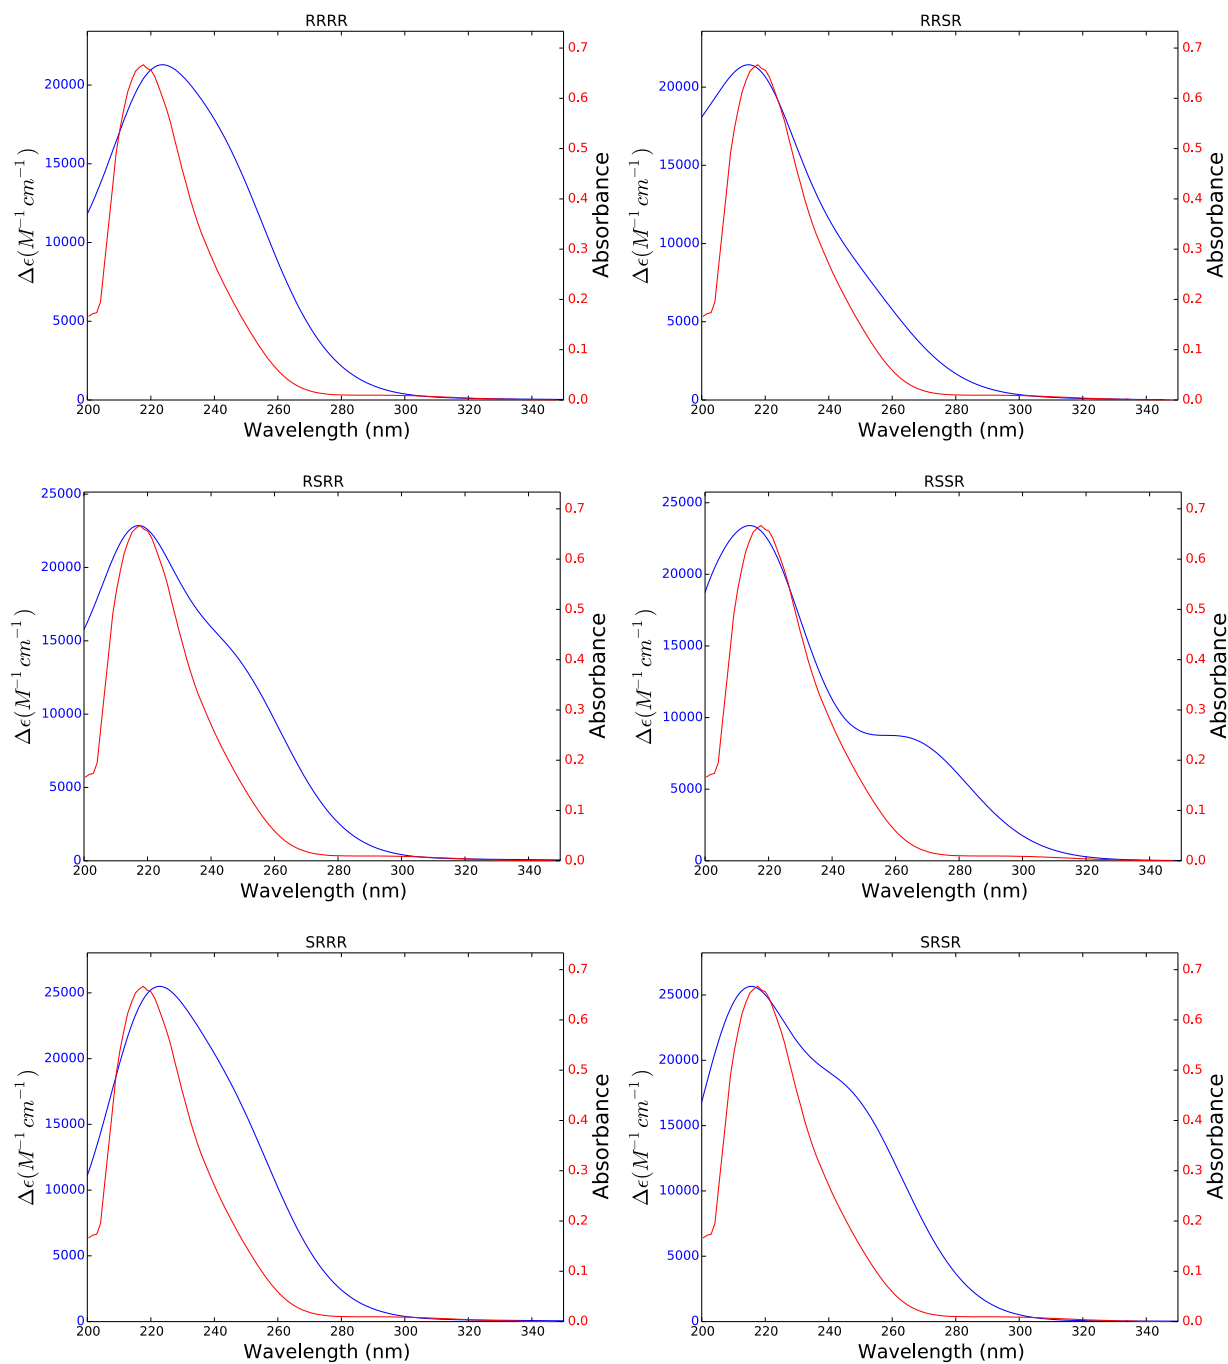

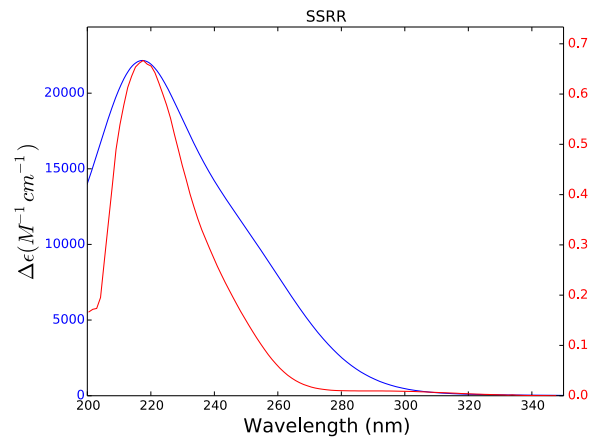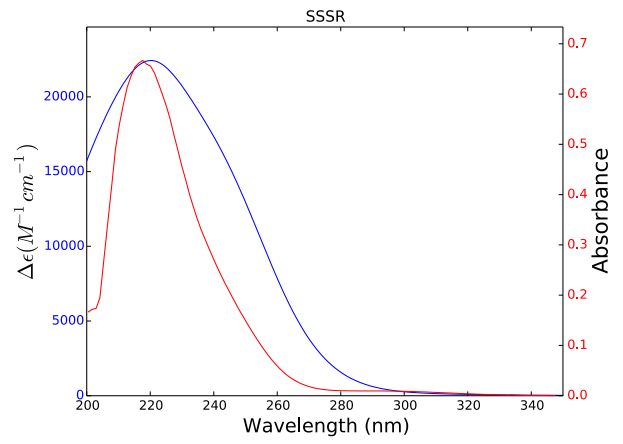

**Table S7.** Calculated Weighted Average Internuclear Distances for Enantiomerically Unique Stereoisomers of Trichospirolide C (**3**)

| Proton Pair | RRRR<br>WA Distance<br>(Å) <sup>a</sup> | RRSR<br>WA Distance<br>(Å) <sup>a</sup> | RSRR<br>WA Distance<br>(Å) <sup>a</sup> | RSSR<br>WA Distance<br>(Å) <sup>a</sup> | NOESY<br>Signal |
|-------------|-----------------------------------------|-----------------------------------------|-----------------------------------------|-----------------------------------------|-----------------|
| H1-H14      | 3.07                                    | 3.08                                    | 3.07                                    | 3.07                                    | medium          |
| H1-H3a      | 2.53                                    | 2.76                                    | 3.12                                    | 2.56                                    | medium          |
| H1-H3b      | 3.59                                    | 3.82                                    | 3.81                                    | 3.77                                    | medium          |
| H8-H15      | 5.58                                    | 5.69                                    | 5.97                                    | 5.30                                    | strong          |
| H6-H15      | 4.62                                    | 3.07                                    | 4.78                                    | 4.70                                    | strong          |
| H3a-H15     | 3.92                                    | 3.96                                    | 3.96                                    | 3.01                                    | strong          |
| H3b-H5      | 3.71                                    | 3.72                                    | 4.31                                    | 3.92                                    | strong          |

  

| Proton Pair | SRRR<br>WA Distance<br>(Å) <sup>a</sup> | SRSR<br>WA Distance<br>(Å) <sup>a</sup> | SSRR<br>WA Distance<br>(Å) <sup>a</sup> | SSSR<br>WA Distance<br>(Å) <sup>a</sup> | NOESY<br>Signal |
|-------------|-----------------------------------------|-----------------------------------------|-----------------------------------------|-----------------------------------------|-----------------|
| H1-H14      | 3.03                                    | 3.01                                    | 3.09                                    | 3.06                                    | medium          |
| H1-H3a      | 3.65                                    | 4.09                                    | 2.68                                    | 2.78                                    | medium          |
| H1-H3b      | 3.81                                    | 3.84                                    | 3.83                                    | 3.73                                    | medium          |
| H8-H15      | 4.65                                    | 3.80                                    | 3.15                                    | 5.76                                    | strong          |
| H6-H15      | 4.44                                    | 4.80                                    | 3.09                                    | 4.63                                    | strong          |
| H3a-H15     | 3.16                                    | 3.32                                    | 2.99                                    | 2.95                                    | strong          |
| H3b-H5      | 3.81                                    | 3.82                                    | 2.69                                    | 2.79                                    | strong          |

<sup>a</sup> Weighted average internuclear distances are reported. In the case of methyl hydrogens, a simple average of the three individual weighted average distances is reported.

**Table S8.** Relative Free Energies and Room Temperature Boltzmann Population for Conformers of Enantiomerically Unique Stereoisomers of Trichospirolide D (**4**)<sup>a</sup>

| Conf. # | RRRR          |                | RRSR          |                | RSRR          |                | RSSR          |                |
|---------|---------------|----------------|---------------|----------------|---------------|----------------|---------------|----------------|
|         | $\Delta G^b$  | % <sup>c</sup> |
| 1       | <b>0.0000</b> | <b>23.20</b>   | <b>0.0000</b> | <b>39.08</b>   | <b>0.0000</b> | <b>42.34</b>   | <b>0.0000</b> | <b>33.59</b>   |
| 2       | <b>0.0646</b> | <b>20.80</b>   | <b>0.3790</b> | <b>20.61</b>   | <b>0.4474</b> | <b>19.90</b>   | <b>0.5622</b> | <b>13.01</b>   |
| 3       | <b>0.2736</b> | <b>14.62</b>   | <b>0.6476</b> | <b>13.10</b>   | <b>0.9808</b> | <b>8.09</b>    | <b>0.6231</b> | <b>11.74</b>   |
| 4       | <b>0.3263</b> | <b>13.37</b>   | <b>1.6610</b> | <b>2.37</b>    | <b>0.9852</b> | <b>8.03</b>    | <b>0.8967</b> | <b>7.40</b>    |
| 5       | <b>0.7467</b> | <b>6.58</b>    | <b>1.7075</b> | <b>2.19</b>    | <b>1.2249</b> | <b>5.36</b>    | <b>0.9325</b> | <b>6.96</b>    |
| 6       | <b>0.8509</b> | <b>5.52</b>    | <b>1.7100</b> | <b>2.18</b>    | <b>1.3466</b> | <b>4.36</b>    | <b>0.9388</b> | <b>6.89</b>    |
| 7       | <b>1.0680</b> | <b>3.82</b>    | 1.7696        | 1.97           | <b>1.3749</b> | <b>4.16</b>    | <b>1.0467</b> | <b>5.74</b>    |
| 8       | <b>1.2318</b> | <b>2.90</b>    | 1.8304        | 1.78           | <b>1.7169</b> | <b>2.33</b>    | <b>1.0931</b> | <b>5.31</b>    |
| 9       | <b>1.3429</b> | <b>2.40</b>    | 1.9164        | 1.54           | 1.8894        | 1.74           | <b>1.2111</b> | <b>4.35</b>    |
| 10      | <b>1.3755</b> | <b>2.28</b>    | 1.9227        | 1.52           | 1.9472        | 1.58           | <b>1.3485</b> | <b>3.45</b>    |
| 11      | <b>1.4357</b> | <b>2.06</b>    | 1.9359        | 1.49           | 2.2691        | 0.92           | 1.8160        | 1.57           |
| 12      | 1.4715        | 1.94           | 2.1222        | 1.09           | 2.4987        | 0.62           | 8.0980        | 0.00           |
| 13      | 2.6657        | 0.26           | 2.1323        | 1.07           | 2.9305        | 0.30           | 8.8153        | 0.00           |
| 14      | 2.6770        | 0.25           | 2.1762        | 0.99           | 3.0547        | 0.24           | 8.9131        | 0.00           |
| 15      | 5.2956        | 0.00           | 2.1881        | 0.97           | 5.1299        | 0.01           | 8.9269        | 0.00           |
| 16      | 5.3012        | 0.00           | 2.2314        | 0.90           | 5.4637        | 0.00           | 8.9684        | 0.00           |
| 17      | 5.3715        | 0.00           | 2.2496        | 0.88           | 5.7781        | 0.00           | 9.2068        | 0.00           |
| 18      | 5.3752        | 0.00           | 2.3770        | 0.71           | 6.0141        | 0.00           | 9.2112        | 0.00           |
| 19      | 5.7386        | 0.00           | 2.4159        | 0.66           | 6.2048        | 0.00           | 9.2576        | 0.00           |
| 20      | 6.1170        | 0.00           | 2.4310        | 0.65           | 6.9691        | 0.00           | 9.3850        | 0.00           |
| 21      | 6.1239        | 0.00           | 2.5006        | 0.57           | 7.1881        | 0.00           | 9.5369        | 0.00           |
| 22      | 6.2776        | 0.00           | 2.5006        | 0.57           | 7.2377        | 0.00           | 9.5400        | 0.00           |
| 23      | 6.4232        | 0.00           | 2.5402        | 0.54           | 8.9483        | 0.00           | 9.8337        | 0.00           |
| 24      | 6.5801        | 0.00           | 2.5483        | 0.53           | 9.0650        | 0.00           | 10.1004       | 0.00           |
| 25      | 6.9045        | 0.00           | 2.6644        | 0.44           | 9.0744        | 0.00           | 10.3602       | 0.00           |
| 26      | 6.9271        | 0.00           | 2.7008        | 0.41           | 9.1478        | 0.00           | 10.5315       | 0.00           |
| 27      | 8.1319        | 0.00           | 2.7328        | 0.39           | 9.2043        | 0.00           | 10.5629       | 0.00           |
| 28      | 8.3452        | 0.00           | 2.9957        | 0.25           | 9.3744        | 0.00           | 10.6313       | 0.00           |
| 29      | 8.5078        | 0.00           | 3.0215        | 0.24           | 9.4986        | 0.00           | 10.8766       | 0.00           |
| 30      | 8.9050        | 0.00           | 3.0830        | 0.21           | 9.5413        | 0.00           | 10.9155       | 0.00           |
| 31      | 9.0142        | 0.00           | 4.4152        | 0.02           | 9.9316        | 0.00           | 10.9249       | 0.00           |
| 32      | 9.0292        | 0.00           | 4.4177        | 0.02           | 9.9423        | 0.00           | 11.1948       | 0.00           |
| 33      | 9.1679        | 0.00           | 4.6323        | 0.02           | 10.4462       | 0.00           | 11.2098       | 0.00           |
| 34      | 10.3589       | 0.00           | 4.7069        | 0.01           | 10.6275       | 0.00           | 11.2575       | 0.00           |
| 35      | 10.9871       | 0.00           | 5.3426        | 0.00           | 11.8750       | 0.00           | 11.2839       | 0.00           |
| 36      | 11.1019       | 0.00           | 5.5478        | 0.00           | 16.0919       | 0.00           | 11.2876       | 0.00           |
| 37      | 11.1370       | 0.00           | 5.7505        | 0.00           | 31.5531       | 0.00           | 11.3328       | 0.00           |
| 38      | 11.4420       | 0.00           | 5.7800        | 0.00           | 37.0921       | 0.00           | 11.4012       | 0.00           |
| 39      | 11.4797       | 0.00           | 5.8001        | 0.00           |               |                | 11.4822       | 0.00           |
| 40      | 11.6146       | 0.00           | 5.8973        | 0.00           |               |                | 11.5732       | 0.00           |
| 41      | 11.8505       | 0.00           | 6.3586        | 0.00           |               |                | 12.3249       | 0.00           |
| 42      | 11.9384       | 0.00           | 6.4194        | 0.00           |               |                | 12.5075       | 0.00           |
| 43      | 15.6846       | 0.00           | 6.4596        | 0.00           |               |                | 16.0322       | 0.00           |
| 44      | 17.6876       | 0.00           | 6.5907        | 0.00           |               |                | 17.3362       | 0.00           |
| 45      |               |                | 8.5950        | 0.00           |               |                |               |                |
| 46      |               |                | 8.9521        | 0.00           |               |                |               |                |



| Conf. # | RRRR         |                | RRSR         |                | RSRR         |                | RSSR         |                |
|---------|--------------|----------------|--------------|----------------|--------------|----------------|--------------|----------------|
|         | $\Delta G^b$ | % <sup>c</sup> |
| 47      |              |                | 11.5807      | 0.00           |              |                |              |                |

<sup>a</sup> Conformers in bold were deemed significant and were selected for the computation of the UV and ECD spectra and optical rotations. <sup>b</sup> Relative Free energy in kcal mol<sup>-1</sup> calculated at the B3LYP/6-31G\* level of theory. <sup>c</sup> Room temperature Boltzmann population in %.

**Table S9.** Relative Free Energies and Room Temperature Boltzmann Population for Conformers of Enantiomerically Unique Stereoisomers of Trichospirolide D (**4**)<sup>a</sup>

| Conf. # | SRRR          |                | SRSR          |                | SSRR          |                | SSSR          |                |
|---------|---------------|----------------|---------------|----------------|---------------|----------------|---------------|----------------|
|         | $\Delta G^b$  | % <sup>c</sup> |
| 1       | <b>0.0000</b> | <b>37.19</b>   | <b>0.0000</b> | <b>19.06</b>   | <b>0.0000</b> | <b>30.63</b>   | <b>0.0000</b> | <b>33.31</b>   |
| 2       | <b>0.5880</b> | <b>13.79</b>   | <b>0.0232</b> | <b>18.33</b>   | <b>0.1355</b> | <b>24.37</b>   | <b>0.4123</b> | <b>16.61</b>   |
| 3       | <b>0.8158</b> | <b>9.39</b>    | <b>0.1399</b> | <b>15.05</b>   | <b>0.4807</b> | <b>13.61</b>   | <b>0.7656</b> | <b>9.15</b>    |
| 4       | <b>0.8566</b> | <b>8.76</b>    | <b>0.3313</b> | <b>10.90</b>   | <b>0.6633</b> | <b>10.00</b>   | <b>0.7743</b> | <b>9.02</b>    |
| 5       | <b>1.0172</b> | <b>6.68</b>    | <b>0.4826</b> | <b>8.44</b>    | <b>0.9149</b> | <b>6.54</b>    | <b>1.0398</b> | <b>5.76</b>    |
| 6       | <b>1.2098</b> | <b>4.83</b>    | <b>0.4970</b> | <b>8.24</b>    | <b>1.2550</b> | <b>3.68</b>    | <b>1.0894</b> | <b>5.30</b>    |
| 7       | <b>1.2613</b> | <b>4.43</b>    | <b>0.5692</b> | <b>7.29</b>    | <b>1.3761</b> | <b>3.00</b>    | <b>1.3630</b> | <b>3.34</b>    |
| 8       | <b>1.3567</b> | <b>3.77</b>    | <b>0.6451</b> | <b>6.42</b>    | <b>1.4508</b> | <b>2.65</b>    | <b>1.3956</b> | <b>3.16</b>    |
| 9       | <b>1.5424</b> | <b>2.75</b>    | <b>1.2720</b> | <b>2.23</b>    | 2.2597        | 0.68           | <b>1.4634</b> | <b>2.82</b>    |
| 10      | <b>1.6108</b> | <b>2.45</b>    | <b>1.2883</b> | <b>2.17</b>    | 2.2747        | 0.66           | <b>1.6271</b> | <b>2.14</b>    |
| 11      | 1.8417        | 1.66           | 1.8173        | 0.89           | 2.3143        | 0.62           | 1.7991        | 1.60           |
| 12      | 1.9767        | 1.32           | 1.8267        | 0.87           | 2.3688        | 0.56           | 1.8700        | 1.42           |
| 13      | 2.0174        | 1.24           | 3.7870        | 0.03           | 2.3883        | 0.54           | 2.1473        | 0.89           |
| 14      | 2.2979        | 0.77           | 3.9778        | 0.02           | 2.4103        | 0.52           | 2.2879        | 0.70           |
| 15      | 2.4034        | 0.64           | 4.3298        | 0.01           | 2.4818        | 0.46           | 2.3638        | 0.62           |
| 16      | 2.8031        | 0.33           | 4.4578        | 0.01           | 2.8414        | 0.25           | 2.4862        | 0.50           |
| 17      | 9.0230        | 0.00           | 4.7496        | 0.01           | 2.9443        | 0.21           | 2.4969        | 0.49           |
| 18      | 10.7467       | 0.00           | 4.8431        | 0.01           | 3.0472        | 0.18           | 2.5489        | 0.45           |
| 19      | 12.2239       | 0.00           | 5.2974        | 0.00           | 3.0478        | 0.18           | 2.8219        | 0.28           |
| 20      | 12.2766       | 0.00           | 5.3727        | 0.00           | 3.0942        | 0.17           | 2.8527        | 0.27           |
| 21      | 12.6368       | 0.00           | 5.5666        | 0.00           | 3.1137        | 0.16           | 2.9192        | 0.24           |
| 22      | 12.6914       | 0.00           | 5.5742        | 0.00           | 3.3672        | 0.10           | 2.9480        | 0.23           |
| 23      | 13.0434       | 0.00           | 5.6564        | 0.00           | 3.7029        | 0.06           | 2.9957        | 0.21           |
| 24      | 13.0453       | 0.00           | 6.1151        | 0.00           | 4.1284        | 0.03           | 3.0001        | 0.21           |
| 25      | 13.0817       | 0.00           | 6.1383        | 0.00           | 4.3875        | 0.02           | 3.0415        | 0.20           |
| 26      | 13.1275       | 0.00           | 6.2174        | 0.00           | 4.4352        | 0.02           | 3.0986        | 0.18           |
| 27      | 13.3942       | 0.00           | 7.2013        | 0.00           | 4.4886        | 0.02           | 3.1106        | 0.17           |
| 28      | 13.4149       | 0.00           | 7.2182        | 0.00           | 4.5683        | 0.01           | 3.1495        | 0.16           |
| 29      | 13.7418       | 0.00           | 7.2597        | 0.00           | 4.6160        | 0.01           | 3.2988        | 0.13           |
| 30      | 15.2780       | 0.00           | 7.5000        | 0.00           | 4.7841        | 0.01           | 3.4337        | 0.10           |
| 31      | 29.6448       | 0.00           | 7.7516        | 0.00           | 4.8626        | 0.01           | 3.4595        | 0.10           |
| 32      |               |                | 7.8570        | 0.00           | 4.9015        | 0.01           | 3.9671        | 0.04           |
| 33      |               |                | 8.0058        | 0.00           | 4.9567        | 0.01           | 4.0167        | 0.04           |
| 34      |               |                | 8.1495        | 0.00           | 5.0835        | 0.01           | 4.3675        | 0.02           |
| 35      |               |                | 8.2442        | 0.00           | 5.1079        | 0.01           | 4.3857        | 0.02           |
| 36      |               |                | 8.2856        | 0.00           | 5.1970        | 0.00           | 4.4014        | 0.02           |
| 37      |               |                | 8.5153        | 0.00           | 5.2912        | 0.00           | 4.5582        | 0.02           |
| 38      |               |                | 8.6358        | 0.00           | 5.4148        | 0.00           | 4.5883        | 0.01           |
| 39      |               |                | 13.3164       | 0.00           | 5.8377        | 0.00           | 4.9021        | 0.01           |
| 40      |               |                | 13.9439       | 0.00           | 5.8622        | 0.00           | 4.9115        | 0.01           |
| 41      |               |                |               |                | 6.2180        | 0.00           | 5.0232        | 0.01           |
| 42      |               |                |               |                | 6.4521        | 0.00           | 5.0339        | 0.01           |
| 43      |               |                |               |                | 7.1655        | 0.00           | 5.0602        | 0.01           |
| 44      |               |                |               |                | 9.1516        | 0.00           | 5.0904        | 0.01           |
| 45      |               |                |               |                | 9.1604        | 0.00           | 5.1456        | 0.01           |
| 46      |               |                |               |                | 9.5858        | 0.00           | 5.2554        | 0.00           |

| Conf. # | SRRR         |                | SRSR         |                | SSRR         |                | SSSR         |                |
|---------|--------------|----------------|--------------|----------------|--------------|----------------|--------------|----------------|
|         | $\Delta G^b$ | % <sup>c</sup> |
| 47      |              |                |              |                | 15.4054      | 0.00           | 5.2679       | 0.00           |
| 48      |              |                |              |                |              |                | 5.2698       | 0.00           |
| 49      |              |                |              |                |              |                | 5.3891       | 0.00           |
| 50      |              |                |              |                |              |                | 5.5089       | 0.00           |
| 51      |              |                |              |                |              |                | 5.5585       | 0.00           |
| 52      |              |                |              |                |              |                | 5.8440       | 0.00           |
| 53      |              |                |              |                |              |                | 5.9864       | 0.00           |
| 54      |              |                |              |                |              |                | 6.5819       | 0.00           |
| 55      |              |                |              |                |              |                | 8.7048       | 0.00           |
| 56      |              |                |              |                |              |                | 11.3912      | 0.00           |

<sup>a</sup> Conformers in bold were deemed significant and were selected for the computation of the UV and ECD spectra and optical rotations. <sup>b</sup> Relative Free energy in kcal mol<sup>-1</sup> calculated at the B3LYP/6-31G\* level of theory. <sup>c</sup> Room temperature Boltzmann population in %.

**Figure S7.** Comparison of Experimental (red) and calculated (blue) ECD Spectra for All Possible Stereoisomers of Trichospirolide D (**4**)

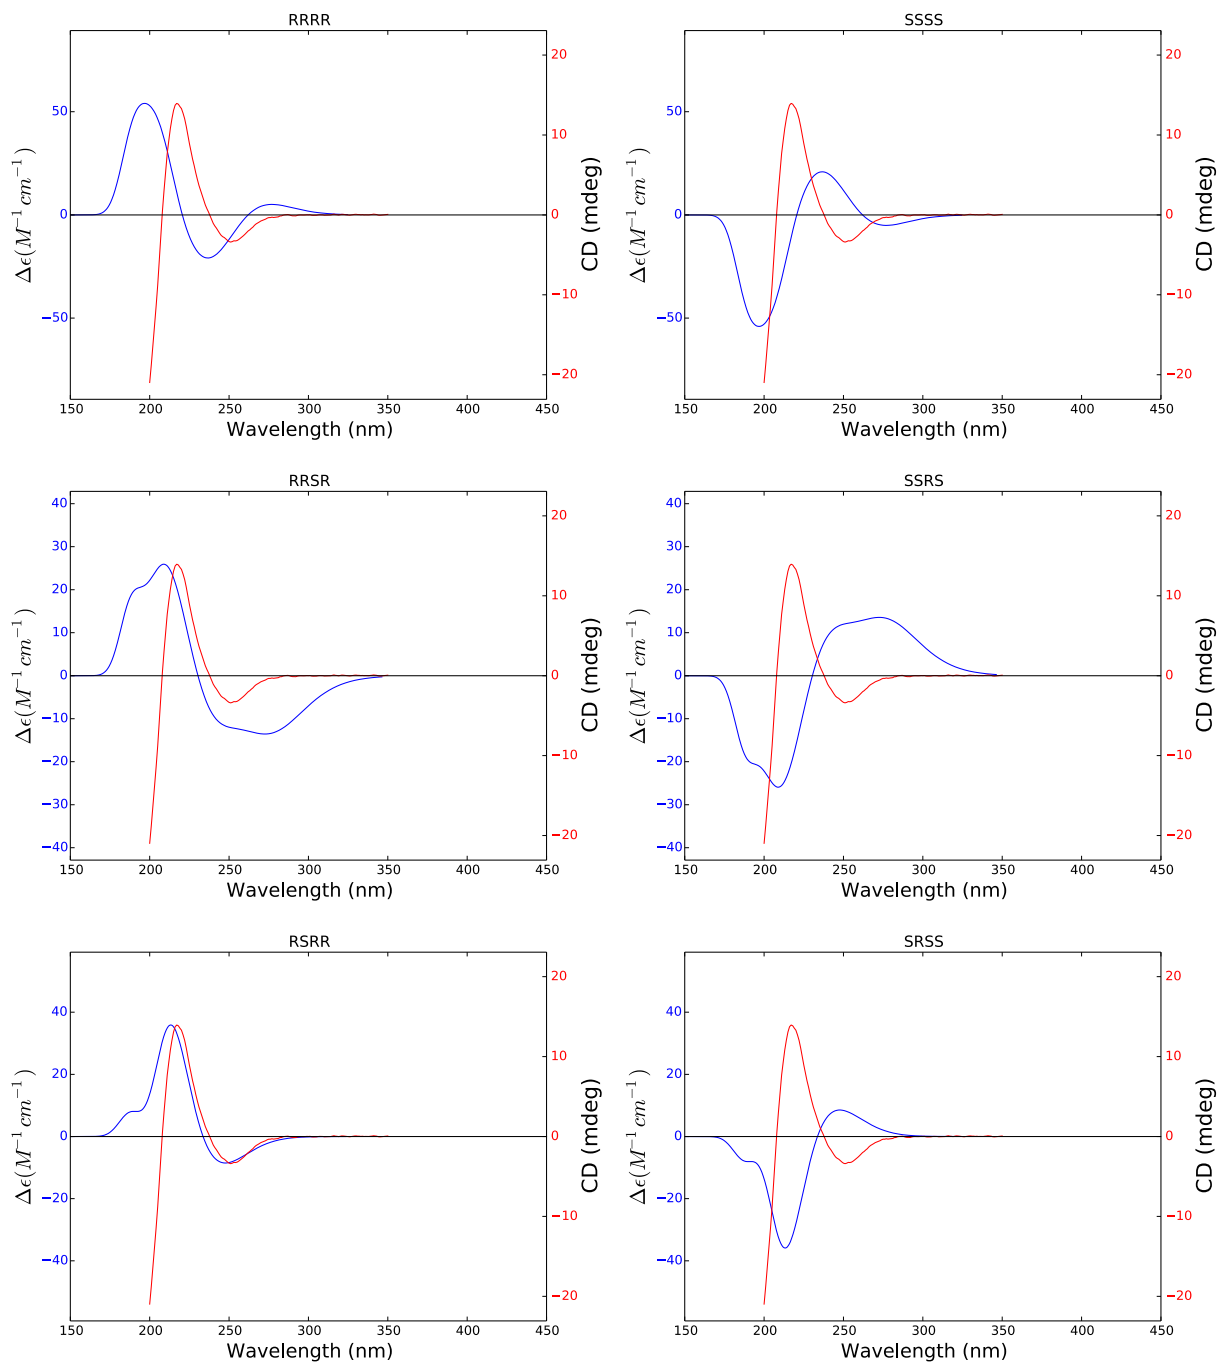

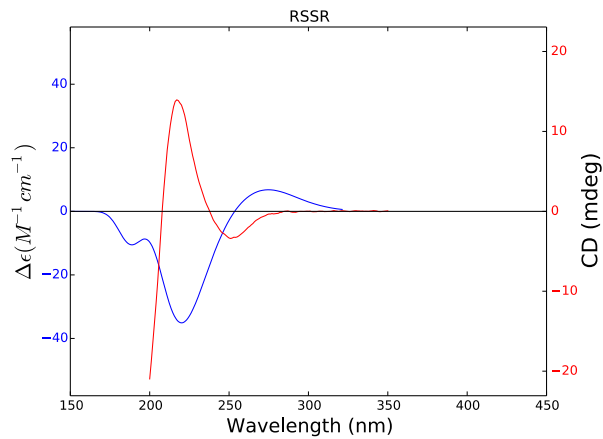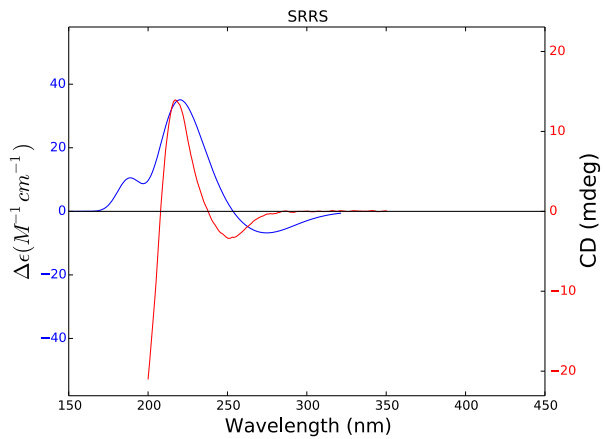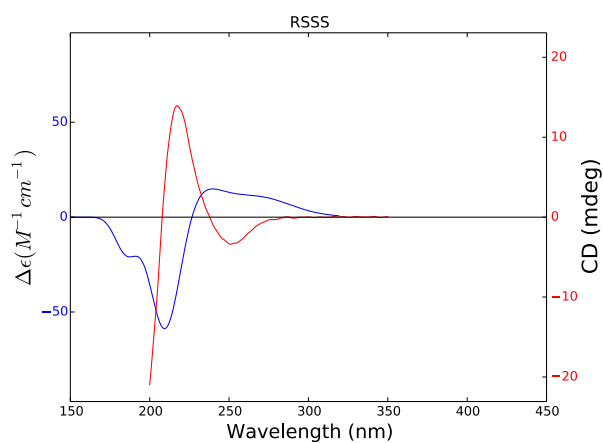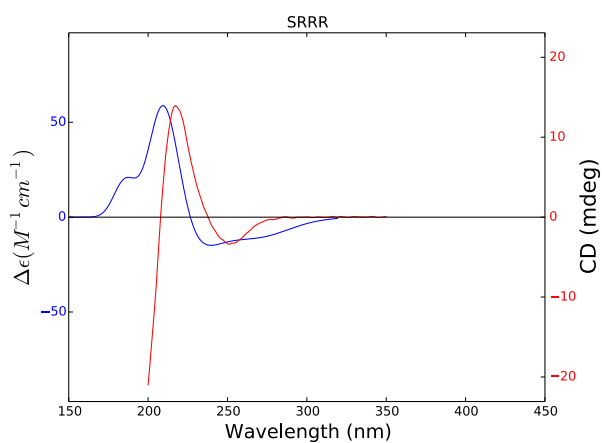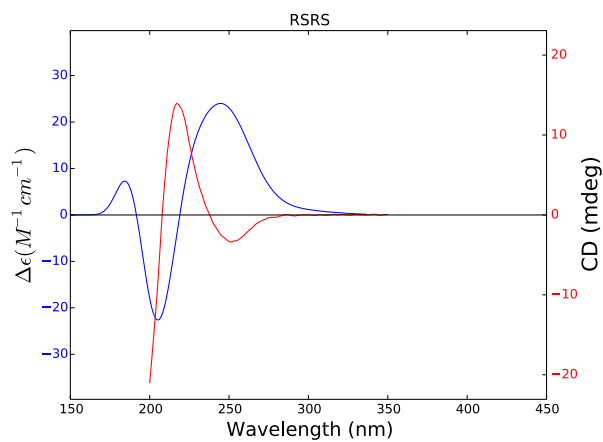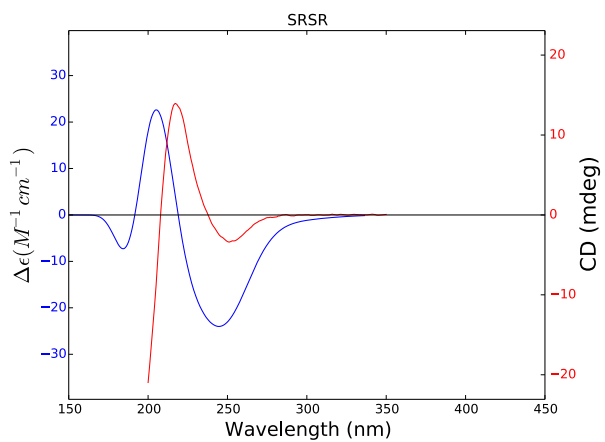

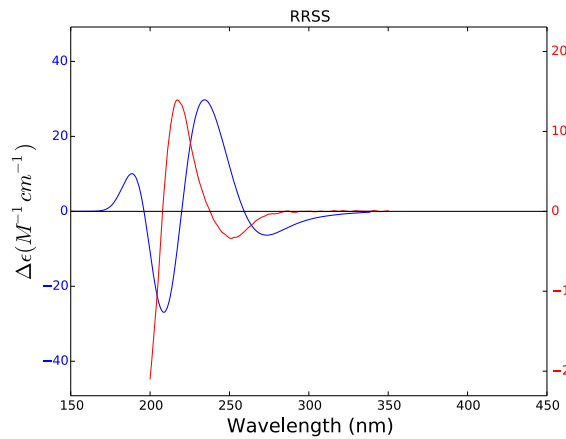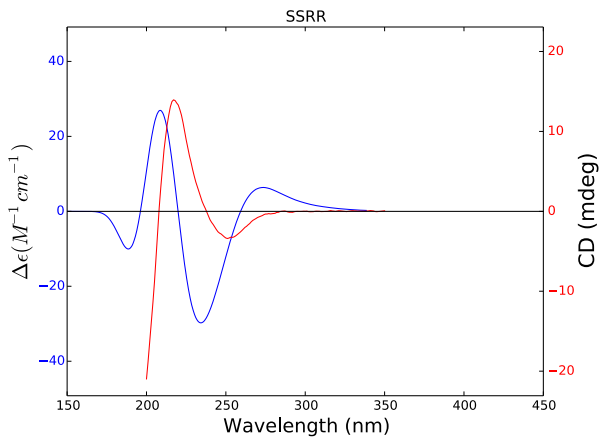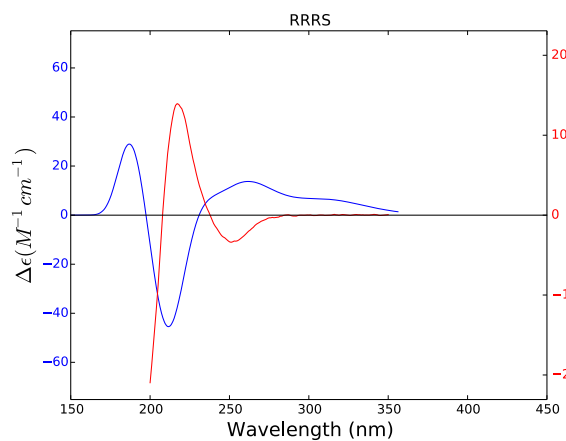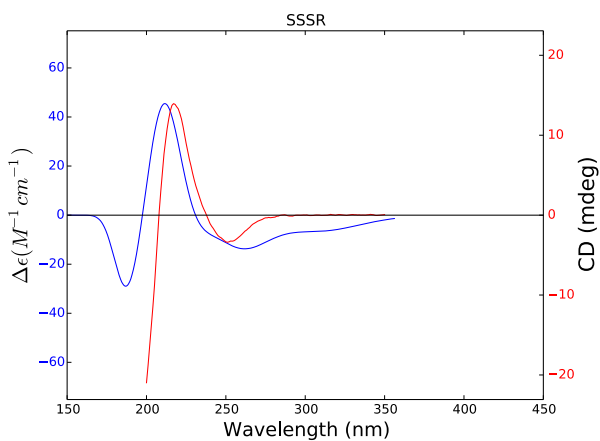

**Figure S8.** Comparison of Experimental (red) and Calculated (blue) UV Spectra for Enantiomerically Unique Stereoisomers of Trichospirolide D (**4**)

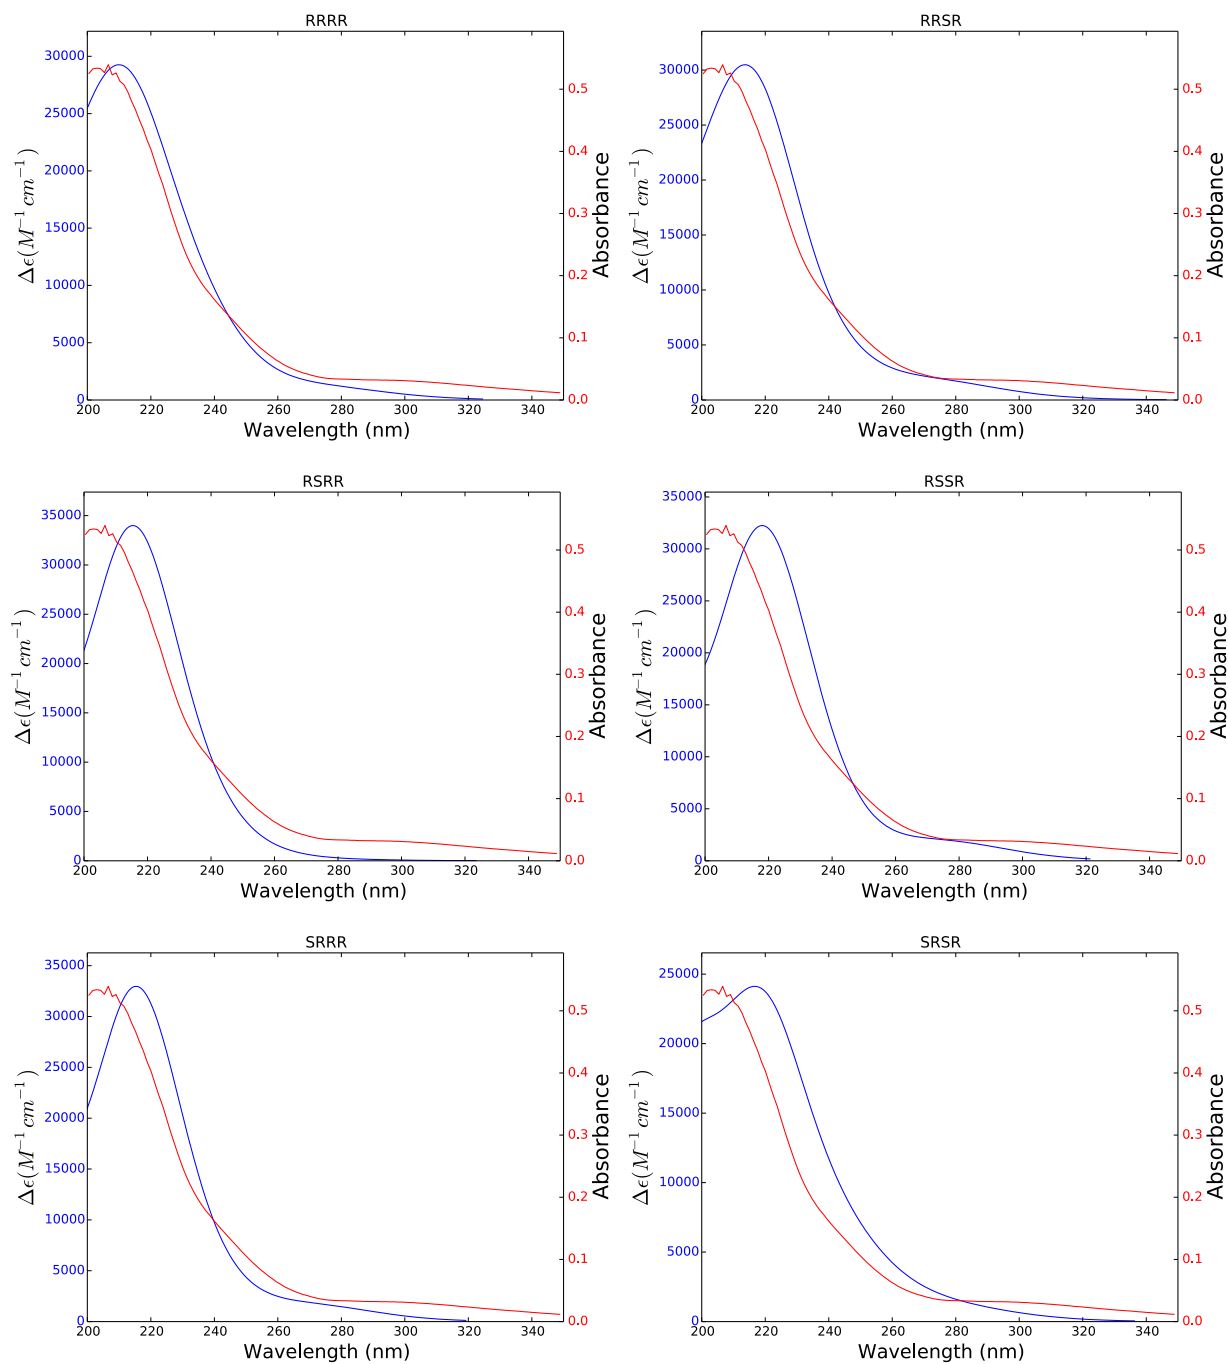

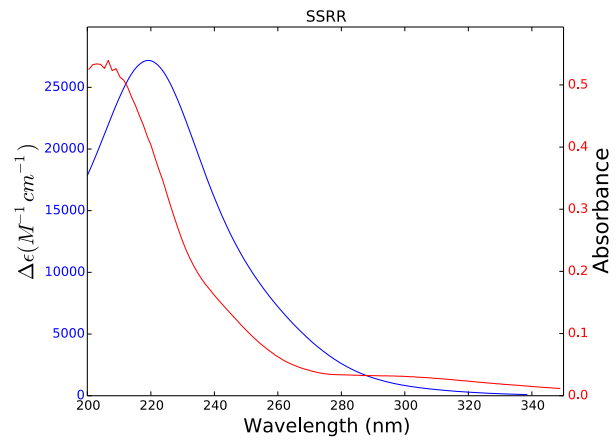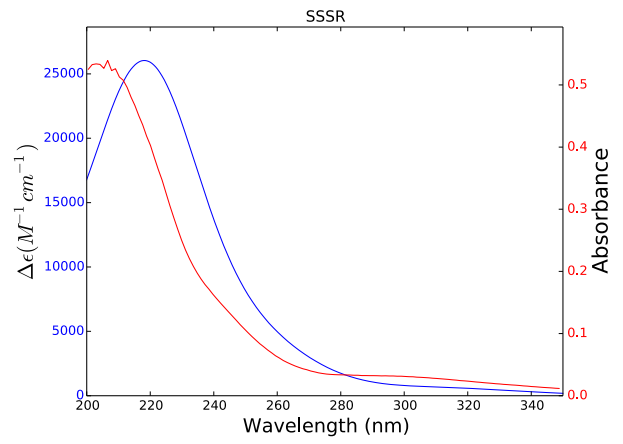



**Table S10.** Calculated Weighted Average Internuclear Distances for Enantiomerically Unique Stereoisomers of Trichospirolide D (**4**)<sup>a</sup>

| Proton Pair | RRRR<br>WA Distance<br>(Å) <sup>a</sup> | RRSR<br>WA Distance<br>(Å) <sup>a</sup> | RSRR<br>WA Distance<br>(Å) <sup>a</sup> | RSSR<br>WA Distance<br>(Å) <sup>a</sup> | NOESY<br>Signal |
|-------------|-----------------------------------------|-----------------------------------------|-----------------------------------------|-----------------------------------------|-----------------|
| H1-H14      | 3.07                                    | 3.04                                    | 2.94                                    | 3.02                                    | medium          |
| H3'b-H4'    | 3.15                                    | 3.16                                    | 3.16                                    | 3.15                                    | medium          |
| H3-H15      | 3.33                                    | 3.36                                    | 3.40                                    | 3.40                                    | medium          |
| H3-H9a      | 2.94                                    | 2.90                                    | 6.07                                    | 5.27                                    | medium          |
| H5-H15      | 3.38                                    | 3.33                                    | 3.53                                    | 3.55                                    | medium          |

  

| Proton Pair | SRRR<br>WA Distance<br>(Å) <sup>a</sup> | SRSR<br>WA Distance<br>(Å) <sup>a</sup> | SSRR<br>WA Distance<br>(Å) <sup>a</sup> | SSSR<br>WA Distance<br>(Å) <sup>a</sup> | NOESY<br>Signal |
|-------------|-----------------------------------------|-----------------------------------------|-----------------------------------------|-----------------------------------------|-----------------|
| H1-H14      | 3.03                                    | 3.06                                    | 3.05                                    | 3.03                                    | medium          |
| H3'b-H4'    | 3.15                                    | 3.15                                    | 3.16                                    | 3.15                                    | medium          |
| H3-H15      | 3.40                                    | 3.38                                    | 3.37                                    | 3.32                                    | medium          |
| H3-H9a      | 5.26                                    | 5.53                                    | 5.03                                    | 4.99                                    | medium          |
| H5-H15      | 3.54                                    | 3.33                                    | 3.35                                    | 3.35                                    | medium          |

<sup>a</sup> Weighted average internuclear distances are reported. In the case of methyl hydrogens, a simple average of the three individual weighted average distances is reported.
